# Supplementary material for: Ruthenium(ii)-catalyzed olefination via carbonyl reductive cross-coupling
Source: PubMed Central journal article supplement (PMC5855968; doi:10.1039/c7sc04207h), 2017-10-09
Supplement: SC-008-C7SC04207H-s001.pdf [file SC-008-C7SC04207H-s001.pdf]

## Supplementary Information

### **Ruthenium(II)-catalyzed olefination *via* carbonyl reductive cross-coupling**

Wei Wei,<sup>a,b†</sup> Xi-Jie Dai,<sup>a†</sup> Haining Wang,<sup>a</sup> Chenchen Li,<sup>a</sup> Xiaobo Yang,<sup>a</sup> and Chao-Jun Li<sup>a\*</sup>

<sup>a</sup> *Department of Chemistry, FQRNT Center for Green Chemistry and Catalysis, McGill University, 801 Sherbrooke Street West, Montreal, Quebec H3A 0B8, Canada*

<sup>b</sup> *School of Chemistry and Chemical Engineering, Qufu Normal University, Qufu 273165, Shandong, China.*

<sup>†</sup> *These authors contributed equally to this work.*

*Email: cj.li@mcgill.ca*

#### **TABLE OF CONTENTS**

|                                                                      |     |
|----------------------------------------------------------------------|-----|
| 1. General information .....                                         | S2  |
| 2. Optimization of the reaction conditions .....                     | S3  |
| 3. General reaction procedure .....                                  | S6  |
| 4. Mechanism investigation.....                                      | S7  |
| 5. Characterization data of products <b>3a–4s</b> .....              | S8  |
| 6. Copies of NMR spectra for <b>3a–4s</b> .....                      | S25 |
| 7. Copies of crude <sup>1</sup> H NMR and HRMS for cross azines..... | S93 |

## 1. General information

**Chemicals:** All catalysts, ligands, bases and additives that are commercially available (Aldrich), were used without further purification: hydrazine hydrate (reagent grade, 64-65% wt), mesitylene, anhydrous sodium sulfate. All liquid carbonyls were distilled and solid ones were recrystallized prior to use.

**Solvents:** Tetrahydrofuran (THF), dimethyl sulfoxide (DMSO) and toluene were taken directly from the *Pure Solvent MD-7* purification system (Innovative Technology). Reaction solvent *tert*-butanol (*t*-BuOH) (ACS grade) was distilled over CaH<sub>2</sub> prior to use. Solvents for filtration, transfers, chromatography and recrystallization were hexane (Fisher, ACS grade), pentane (ACS grade) and dichloromethane (CH<sub>2</sub>Cl<sub>2</sub>)(ACS grade, amylene stabilized).

**NMR Spectroscopy:** Nuclear magnetic resonance (<sup>1</sup>H and <sup>13</sup>C NMR) spectra were recorded on a Bruker AV500 equipped with a 60-position SampleXpress sample changer (<sup>1</sup>H, 500 MHz; <sup>13</sup>C, 125 MHz), or Bruker AV400 spectrometer (<sup>1</sup>H, 400 MHz; <sup>13</sup>C, 100 MHz). Chemical shifts for both <sup>1</sup>H NMR and <sup>13</sup>C NMR spectra are expressed in parts per million (ppm) units downfield from TMS, with the solvent residue peak as the reference (CDCl<sub>3</sub>: δ 7.26 ppm in <sup>1</sup>H NMR; δ 77.0 ppm in <sup>13</sup>C NMR). Data are reported as following: chemical shift, multiplicity (s = singlet, d = doublet, dd = doublet of doublets, t = triplet, td = triplet of doublets, dt = doublet of triplets, q = quartet, quin = quintet, sep = septet, m = multiplet, br = broad singlet), coupling constants *J* (Hz), and integration.

**Mass Spectrometry:** Mass spectrometry (MS) was performed by the McGill Chemistry Department Mass Spectrometry Facility. High Resolution Mass spectra were recorded using electrospray ionization (ESI+) and/or atmospheric pressure chemical ionization APCI (+/-), performed either on an "Exactive Plus Orbitrap" Thermo Scientific high resolution accurate mass (HR/AM) FT mass spectrometer, or a Bruker Daltonics Maxis Impact quadrupole-time of flight (QTOF) mass spectrometer.

**Reaction Setup:** All reactions were carried out in flamed-dried V-shaped microwave reaction vials, covered by aluminum seals with PTFE-faced silicone septa, under an atmosphere of nitrogen unless otherwise stated. All reported reaction temperatures correspond to oil bath temperatures. All air and moisture sensitive catalysts, ligands, and reagents were stored and charged in MBRAUN UNIlab Pro Glove Box Workstation.

**Purifications:** All work-up and purification procedures were carried out with reagent grade solvents. Analytical thin-layer chromatography (TLC) was performed using E. Merck silica gel 60 F254 pre-coated plates (0.25 mm). Flash column chromatography was performed with E. Merck silica gel P60 (40-63 μm particle size, 230-00 mesh) (SiO<sub>2</sub>). Unless otherwise specified, "SiO<sub>2</sub>" refers to P60 grade silica gel. Automated flash column chromatography was performed on Biotage Isolera™ Spektra Systems with ACI™.

## 2. Optimization of the reaction conditions

Table S1. The effect of catalysts<sup>[a]</sup>

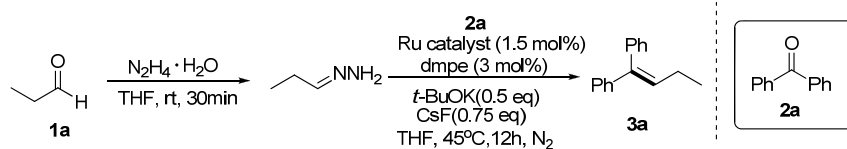

| Entry | Catalyst                                                                      | Yield(%) <sup>[b]</sup> | Entry | Catalyst                                                     | Yield(%) <sup>[b]</sup> |
|-------|-------------------------------------------------------------------------------|-------------------------|-------|--------------------------------------------------------------|-------------------------|
| 1     | ---                                                                           | 0                       | 8     | Chlorocyclopentadienyl-bis(triphenylphosphine)-ruthenium(II) | 22                      |
| 2     | $[(\text{C}_5\text{H}_5)\text{Ru}(\text{CH}_3\text{CN})_3]\text{PF}_6$        | 2                       | 9     | dichloro(pentamethylcyclopentadienyl)ruthenium(III) polymer  | 2                       |
| 3     | $[(\text{C}_6\text{H}_5)_3\text{P}]_3\text{Ru}(\text{CO})(\text{Cl})\text{H}$ | 3                       | 10    | $\text{Ru}_3(\text{CO})_{12}$                                | 0                       |
| 4     | $[\text{Ru}(p\text{-cymene})\text{Cl}_2]_2$                                   | 84                      | 11    | bis(cyclopentadienyl)-ruthenium(II)                          | 0                       |
| 5     | $\text{RuCl}_2(\text{PPh}_3)_3$                                               | 74                      | 12    | $\text{Ru}_2(\text{C}_6\text{H}_6)_2\text{Cl}_4$             | 68                      |
| 6     | $[\text{Ru}(\text{COD})\text{Cl}_2]_n$                                        | 78                      | 13    | $[\text{Ru}(\text{CO})_3\text{Cl}_2]_2$                      | 16                      |
| 7     | $\text{RuCl}_3$                                                               | 2                       |       |                                                              |                         |

[a] **1a** (0.28 mmol, 1.4 equiv.),  $\text{N}_2\text{H}_4 \cdot \text{H}_2\text{O}$  (0.3 mmol, 1.5 equiv.), THF (0.14 mL), r.t., 30 min; **2a** (0.20 mmol, 1.0 equiv.), Ru catalyst (0.003 mmol, 1.5 mol%), dmpe (0.006 mmol, 3.0 mol%), *t*-BuOK (0.1 mmol, 50 mol%), CsF (0.15 mmol, 75 mol%), 45°C, 12 h, under  $\text{N}_2$ . [b] Yields were determined by crude  $^1\text{H}$  NMR using mesitylene as an internal standard.

Table S2. The effect of ligands<sup>[a]</sup>

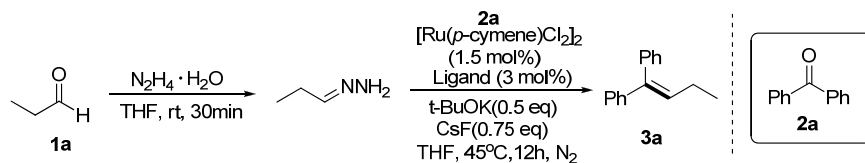

| Entry | Ligand                                                | Yield(%) <sup>[b]</sup> | Entry | Ligand                               | Yield(%) <sup>[b]</sup> |
|-------|-------------------------------------------------------|-------------------------|-------|--------------------------------------|-------------------------|
| 1     | ---                                                   | 0                       | 8     | $\text{P}(p\text{-tolyl})_3$         | 4                       |
| 2     | dppe                                                  | 10                      | 9     | $\text{Ph}_4\text{P}^+\text{BF}_4^-$ | 2                       |
| 3     | dppb                                                  | 11                      | 10    | trimesitylphosphine                  | 0                       |
| 4     | dppp                                                  | 15                      | 11    | 1,4-bis(dicyclohexylphosphino)butane | 10                      |
| 5     | dppm                                                  | 4                       | 12    | dicyclohexylphenylphosphine          | 8                       |
| 6     | dmpe                                                  | 84                      | 13    | DavePhos                             | 2                       |
| 7     | <i>trans</i> - $\text{PPh}_2\text{CH}=\text{CHPPh}_2$ | 3                       | 14    | BrettPhos                            | 0                       |

[a] **1a** (0.28 mmol, 1.4 equiv.),  $\text{N}_2\text{H}_4 \cdot \text{H}_2\text{O}$  (0.3 mmol, 1.5 equiv.), THF (0.14 mL), r.t., 30 min; **2a** (0.20 mmol, 1.0 equiv.),  $[\text{Ru}(p\text{-cymene})\text{Cl}_2]_2$  (0.003 mmol, 1.5 mol%), ligand (0.006 mmol, 3.0 mol%), *t*-BuOK (0.1 mmol, 50 mol%), CsF (0.15 mmol, 75 mol%), 45°C, 12 h, under  $\text{N}_2$ . [b] Yields were determined by crude  $^1\text{H}$  NMR using mesitylene as an internal standard.

**Table S3. The effect of bases<sup>[a]</sup>**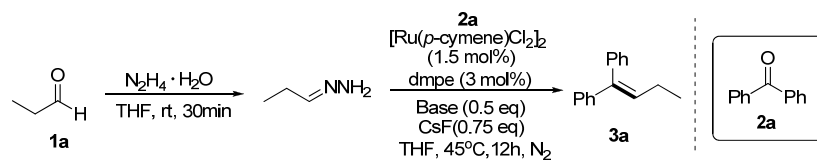

| Entry | Base                            | Yield(%) <sup>[b]</sup> | Entry | Base              | Yield(%) <sup>[b]</sup> |
|-------|---------------------------------|-------------------------|-------|-------------------|-------------------------|
| 1     | ---                             | 0                       | 7     | NaOH              | 78                      |
| 2     | K <sub>3</sub> PO <sub>4</sub>  | 51                      | 8     | <i>t</i> -BuOK    | 84                      |
| 3     | K <sub>2</sub> CO <sub>3</sub>  | 4                       | 9     | <i>t</i> -BuONa   | 80                      |
| 4     | Na <sub>2</sub> CO <sub>3</sub> | 0                       | 10    | CsOH              | 82                      |
| 5     | Cs <sub>2</sub> CO <sub>3</sub> | 21                      | 11    | DBU               | 0                       |
| 6     | KOH                             | 78                      | 12    | Et <sub>3</sub> N | 0                       |

[a] **1a** (0.28 mmol, 1.4 equiv.), N<sub>2</sub>H<sub>4</sub>·H<sub>2</sub>O (0.3 mmol, 1.5 equiv.), THF (0.14 mL), r.t., 30 min; **2a** (0.20 mmol, 1.0 equiv.), [Ru(*p*-cymene)Cl<sub>2</sub>]<sub>2</sub> (0.003 mmol, 1.5 mol%), dmpe (0.006 mmol, 3.0 mol%), base (0.1 mmol, 50 mol%), additive: CsF (0.15 mmol, 75 mol%), 45°C, 12 h, under N<sub>2</sub>.  
 [b] Yields were determined by crude <sup>1</sup>H NMR using mesitylene as an internal standard.

**Table S4. The effect of loading of base<sup>[a]</sup>**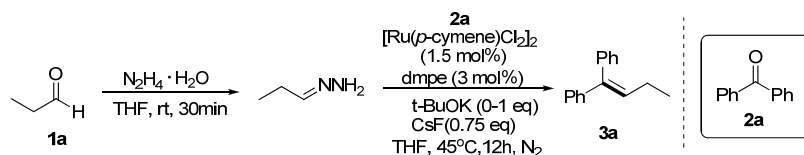

| Entry | <i>t</i> -BuOK(equiv) | Yield(%) <sup>[b]</sup> | Entry | <i>t</i> -BuOK(equiv) | Yield(%) <sup>[b]</sup> |
|-------|-----------------------|-------------------------|-------|-----------------------|-------------------------|
| 1     | 0                     | 0                       | 4     | 0.5                   | 84                      |
| 2     | 0.125                 | 41                      | 5     | 0.75                  | 84                      |
| 3     | 0.25                  | 74                      | 6     | 1                     | 58                      |

[a] **1a** (0.28 mmol, 1.4 equiv.), N<sub>2</sub>H<sub>4</sub>·H<sub>2</sub>O (0.3 mmol, 1.5 equiv.), THF (0.14 mL), r.t., 30 min; **2a** (0.20 mmol, 1.0 equiv.), [Ru(*p*-cymene)Cl<sub>2</sub>]<sub>2</sub> (0.003 mmol, 1.5 mol%), dmpe (0.006 mmol, 3.0 mol%), *t*-BuOK (0-1eq), additive: CsF (0.15 mmol, 75 mol%), 45°C, 12 h, under N<sub>2</sub>. [b] Yields were determined by crude <sup>1</sup>H NMR using mesitylene as an internal standard.

**Table S5. The effect of solvents<sup>[a]</sup>**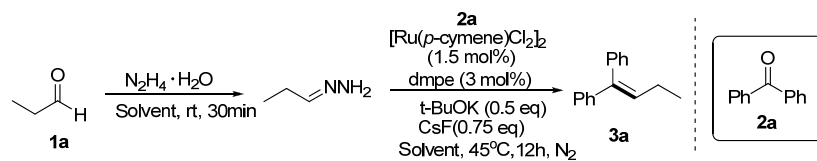

| Entry | Solvent         | Yield(%) <sup>[b]</sup> | Entry | Solvent                | Yield(%) <sup>[b]</sup> |
|-------|-----------------|-------------------------|-------|------------------------|-------------------------|
| 1     | THF             | 84                      | 6     | DMSO                   | 0                       |
| 2     | 1,4-dioxane     | 67                      | 7     | $\text{CH}_3\text{CN}$ | 0                       |
| 3     | DME             | 76                      | 8     | DCE                    | 0                       |
| 4     | toluene         | 7                       | 9     | DMF                    | 0                       |
| 5     | $t\text{-BuOH}$ | 12                      | 10    | EtOH                   | 0                       |

[a] **1a** (0.28 mmol, 1.4 equiv.),  $\text{N}_2\text{H}_4 \cdot \text{H}_2\text{O}$  (0.3 mmol, 1.5 equiv.), solvent (0.14 mL), rt., 30 min; **2a** (0.20 mmol, 1.0 equiv.),  $[\text{Ru}(p\text{-cymene})\text{Cl}_2]_2$  (0.003 mmol, 1.5 mol%),  $\text{dmpe}$  (0.006 mmol, 3.0 mol%),  $t\text{-BuOK}$  (0.1 mmol, 50 mol%), additive:  $\text{CsF}$  (0.15 mmol, 75 mol%), 45°C, 12 h, under  $\text{N}_2$ . [b] Yields were determined by crude  $^1\text{H}$  NMR using mesitylene as an internal standard.

**Table S6. The effect of loading of CsF<sup>[a]</sup>**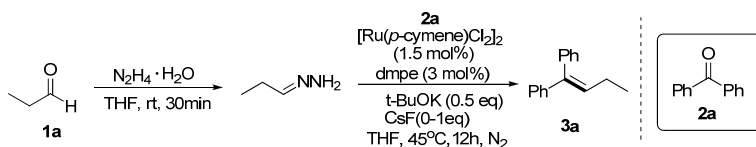

| Entry | CsF(equiv) | Yield(%) <sup>[b]</sup> | Entry | CsF(equiv) | Yield(%) <sup>[b]</sup> |
|-------|------------|-------------------------|-------|------------|-------------------------|
| 1     | 0          | 52                      | 4     | 0.75       | 84                      |
| 2     | 0.25       | 60                      | 5     | 1          | 76                      |
| 3     | 0.5        | 69                      |       |            |                         |

[a] **1a** (0.28 mmol, 1.4 equiv.),  $\text{N}_2\text{H}_4 \cdot \text{H}_2\text{O}$  (0.3 mmol, 1.5 equiv.), THF (0.14 mL), rt., 30 min; **2a** (0.20 mmol, 1.0 equiv.),  $[\text{Ru}(p\text{-cymene})\text{Cl}_2]_2$  (0.003 mmol, 1.5 mol%),  $\text{dmpe}$  (0.006 mmol, 3.0 mol%),  $\text{KO}^t\text{Bu}$  (0.1 mmol, 50 mol%), additive:  $\text{CsF}$  (0-1 equiv.), 45°C, 12 h, under  $\text{N}_2$ . [b] Yields were determined by crude  $^1\text{H}$  NMR using mesitylene as an internal standard.

**Table S7. The effect of temperature<sup>[a]</sup>**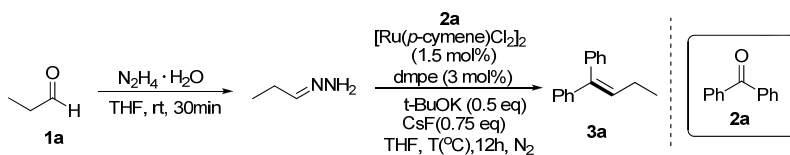

| Entry | T(°C) | Yield(%) <sup>[b]</sup> | Entry | T(°C) | Yield(%) <sup>[b]</sup> |
|-------|-------|-------------------------|-------|-------|-------------------------|
| 1     | 25    | 48                      | 4     | 55    | 70                      |
| 2     | 35    | 80                      | 5     | 65    | 77                      |
| 3     | 45    | 84                      |       |       |                         |

[a] **1a** (0.28 mmol, 1.4 equiv.),  $\text{N}_2\text{H}_4 \cdot \text{H}_2\text{O}$  (0.3 mmol, 1.5 equiv.), THF (0.14 mL), rt., 30 min; **2a** (0.20 mmol, 1.0 equiv.),  $[\text{Ru}(p\text{-cymene})\text{Cl}_2]_2$  (0.003 mmol, 1.5 mol%),  $\text{dmpe}$  (0.006 mmol, 3.0 mol%),  $t\text{-BuOK}$  (0.1 mmol, 50 mol%), additive:  $\text{CsF}$  (0.15 mmol, 75 mol%), 25-65°C, 12 h, under  $\text{N}_2$ . [b] Yields were determined by crude  $^1\text{H}$  NMR using mesitylene as an internal standard.

**Table S8. The scope of other substrates** <sup>[a,b]</sup>

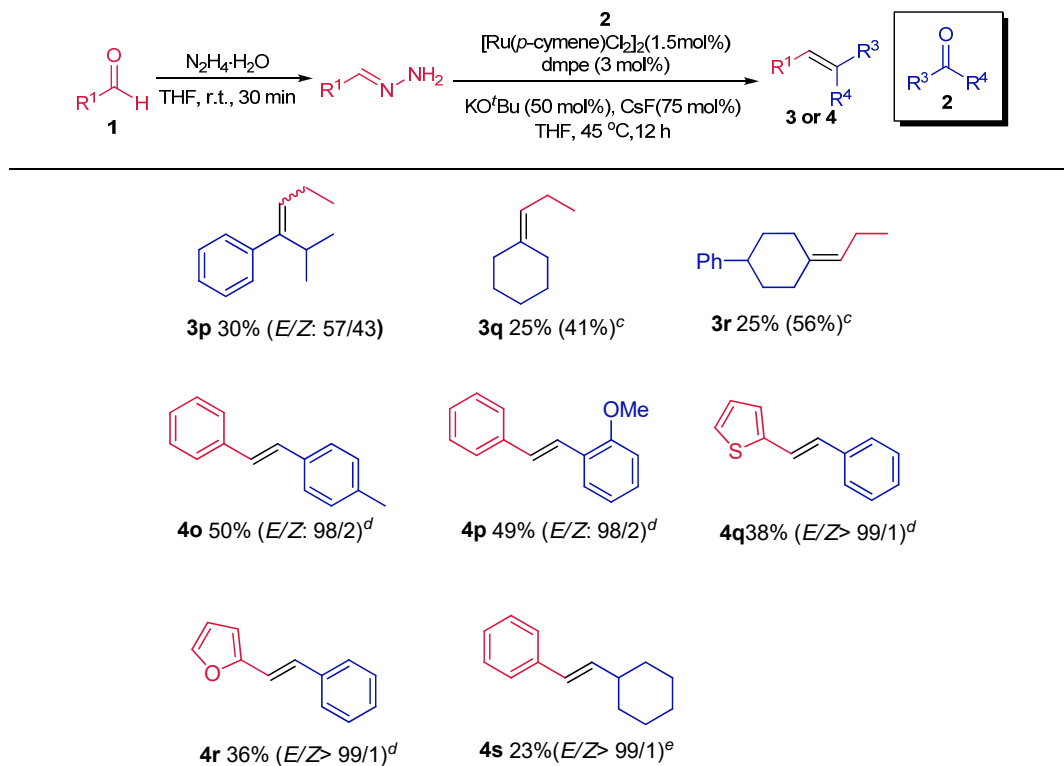

<sup>[a]</sup> **1** (0.28 mmol, 1.4 equiv.),  $\text{N}_2\text{H}_4\cdot\text{H}_2\text{O}$  (0.3 mmol, 1.5 equiv.), THF (0.14 mL), r.t., 30 min; **2** (0.20 mmol, 1.0 equiv.),  $[\text{Ru}(p\text{-cymene)Cl}_2]_2$  (0.003 mmol, 1.5 mol%), dmpe (0.006 mmol, 3.0 mol%), *t*-BuOK (0.1 mmol, 50 mol%); additive: CsF (0.15 mmol, 75 mol%), 45 °C, 12 h, under  $\text{N}_2$ . <sup>[b]</sup> Isolated yields and the ratio of *E/Z* isomers were determined by crude  $^1\text{H}$  NMR analysis. <sup>[c]</sup> Yields were determined by crude  $^1\text{H}$  NMR using mesitylene as an internal standard. <sup>[d]</sup>  $\text{K}_2\text{CO}_3$  (0.1 mmol, 50 mol%), 120 °C, 24 h. <sup>[e]</sup>  $\text{K}_3\text{PO}_4$  (0.1 mmol, 50 mol%), 12h.

### 3. General reaction procedure

#### 3.1 The general procedure for intermolecular olefination via carbonyl cross-coupling

A flamed-dried V-shape microwave reaction vial (10 cm<sup>3</sup>) equipped with a magnetic stir bar was charged with  $[\text{Ru}(p\text{-cymene)Cl}_2]_2$  (1.8 mg, 0.003 mmol, 1.5 mol%) and KO<sup>t</sup>Bu (11.2 mg, 0.1 mmol, 50 mol%). The reaction vial was then transferred into the glovebox and charged with dmpe (1.0 μL, 0.006 mmol, 3 mol%) and CsF (22.8 mg, 0.15 mmol, 75 mol%), before being sealed with a rubber septum. The reaction vial was then moved out of the glovebox and sequentially charged with ketones or aldehydes (0.2 mmol, 1.0 equiv) and the **hydrazone solution** (0.28 mmol). The reaction mixture was then heated to 45 °C in an oil bath. Upon stirring for 12 h,

the reaction mixture was filtered through a plug of silica gel with CH<sub>2</sub>Cl<sub>2</sub> (10 mL) as eluent, concentrated and purified by flash chromatography (hexane as eluent) to give the corresponding alkenes.

**Hydrazone solution:** A mixture of carbonyls (0.28 mmol, 1.4 equiv) and hydrazine monohydrate (17.5  $\mu$ L, 0.3 mmol, 64-65 wt%, 1.5 equiv) in THF (0.14 mL) solution was stirred at room temperature for 30 min. Prior to the injection of this hydrazone solution into reaction mixture, a small amount of anhydrous Na<sub>2</sub>SO<sub>4</sub> was added.

### 3.2 The general procedure for intramolecular olefination via carbonyl cross-coupling

A flamed-dried V-shape microwave reaction vial (10 cm<sup>3</sup>) equipped with a magnetic stir bar was charged with [Ru(*p*-cymene)Cl<sub>2</sub>]<sub>2</sub> (1.8 mg, 0.003 mmol, 1.5 mol%) and KO<sup>t</sup>Bu (11.2 mg, 0.1 mmol, 50 mol%). The reaction vial was then transferred into the glovebox and charged with dmpe (1.0  $\mu$ L, 0.006 mmol, 3 mol%) and CsF (22.8 mg, 0.15 mmol, 75 mol%), before being sealed with a rubber septum. The reaction vial was then moved out of the glovebox and charged with the **hydrazone solution** (0.2 mmol). The reaction mixture was then heated to 45 °C in an oil bath. Upon stirring for 12 h, the reaction mixture was filtered through a plug of silica gel with CH<sub>2</sub>Cl<sub>2</sub> (10 mL) as eluent, concentrated and purified by flash chromatography (hexane as eluent) to give the corresponding cyclic alkenes.

**Hydrazone solution:** A mixture of carbonyls (0.2 mmol, 1 equiv) and hydrazine monohydrate (15  $\mu$ L, 0.26 mmol, 64-65 wt%, 1.3 equiv) in THF (0.15 mL) solution was stirred at room temperature for 30 min. Prior to the injection of this hydrazone solution into reaction mixture, a small amount of anhydrous Na<sub>2</sub>SO<sub>4</sub> was added.

## 4. Mechanism investigation

### 4.1 Olefin production from asymmetric azine

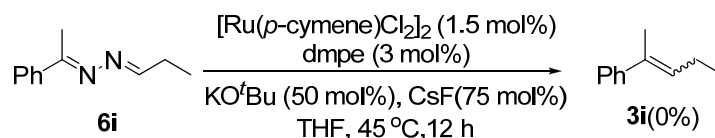

A flamed-dried V-shape microwave reaction vial (10 cm<sup>3</sup>) equipped with a magnetic stir bar was charged with [Ru(*p*-cymene)Cl<sub>2</sub>]<sub>2</sub> (1.8 mg, 0.003 mmol, 1.5 mol%) and KO<sup>t</sup>Bu (11.2 mg, 0.1 mmol, 50 mol%). The reaction vial was then transferred into the glovebox and charged with dmpe (1.0 μL, 0.006 mmol, 3 mol%) and CsF (22.8 mg, 0.15 mmol, 75 mol%), before being sealed with a rubber septum. The reaction vial was then moved out of the glovebox and sequentially charged with presynthesized azine **6i** (0.2 mmol, 1.0 equiv) and THF (140 μL). The reaction mixture was then heated to 45 °C in an oil bath. Upon stirring for 12 h, the reaction mixture was analyzed by <sup>1</sup>H NMR using mesitylene as an internal standard. No desired alkene **3i** was detected.

#### 4.2 Olefin production from alcohol

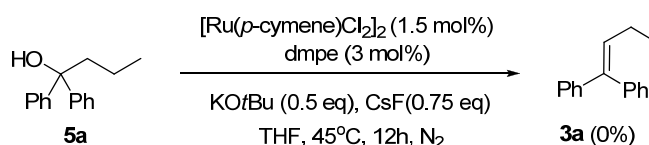

A flamed-dried V-shape microwave reaction vial (10 cm<sup>3</sup>) equipped with a magnetic stir bar was charged with [Ru(*p*-cymene)Cl<sub>2</sub>]<sub>2</sub> (1.8 mg, 0.003 mmol, 1.5 mol%) and KO<sup>t</sup>Bu (11.2 mg, 0.1 mmol, 50 mol%). The reaction vial was then transferred into the glovebox and charged with dmpe (1.0 μL, 0.006 mmol, 3 mol%) and CsF (22.8 mg, 0.15 mmol, 75 mol%), before being sealed with a rubber septum. The reaction vial was then moved out of the glovebox and sequentially charged with 1,1-diphenylbutan-1-ol **5a** (0.2 mmol, 1.0 equiv) and THF (140 μL). The reaction mixture was then heated to 45 °C in an oil bath. Upon stirring for 12 h, the reaction mixture was analyzed by <sup>1</sup>H NMR using mesitylene as an internal standard. No desired alkene **3a** was detected.

#### 5. Characterization data of products 3a-4s

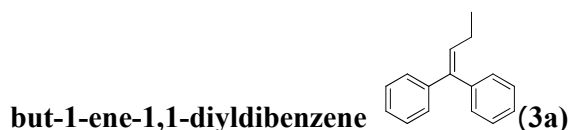

Colorless oil; The spectroscopic data correspond to those previously reported in the literature.<sup>[1]</sup> <sup>1</sup>H NMR (CDCl<sub>3</sub>, 500 MHz, ppm): δ 7.43-7.40 (m, 2H), 7.34 (tt, *J*<sub>1</sub> = 1.4



Hz,  $J_2 = 7.5$  Hz, 1H), 7.32-7.22 (m, 7H), 6.12 (t,  $J = 7.5$  Hz, 1H), 2.17 (quint,  $J = 7.5$  Hz, 2H), 1.09 (t,  $J = 7.5$  Hz, 3H);  $^{13}\text{C}$  NMR ( $\text{CDCl}_3$ , 125 MHz, ppm):  $\delta$  142.9, 141.0, 140.3, 131.8, 129.9, 128.1, 128.0, 127.2, 126.9, 126.8, 23.2, 14.6; MS (EI)  $m/z$ : 208.1, 193.1, 178.1, 165.1, 129.1.

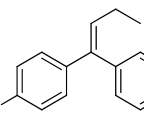

**4,4'-(but-1-ene-1,1-diyl)bis(phenoxybenzene)**  $\text{PhO}$    **(3b)**

Colorless oil;  $^1\text{H}$  NMR ( $\text{CDCl}_3$ , 500 MHz, ppm):  $\delta$  7.41-7.34 (m, 4H), 7.23 (d,  $J = 8.7$  Hz, 2H), 7.18-7.09 (m, 6H), 7.06-7.03 (m, 4H), 6.94 (d,  $J = 8.7$  Hz, 2H), 6.04 (t,  $J = 7.5$  Hz, 1H), 2.18 (quint,  $J = 7.5$  Hz, 2H), 1.08 (t,  $J = 7.5$  Hz, 3H);  $^{13}\text{C}$  NMR ( $\text{CDCl}_3$ , 125 MHz, ppm):  $\delta$  157.3, 157.1, 156.3, 156.2, 139.6, 138.1, 135.1, 131.2, 131.2, 129.8, 129.7, 128.5, 123.4, 123.2, 119.1, 118.8, 118.5, 118.3, 23.3, 14.6; HRMS calc. for  $\text{C}_{28}\text{H}_{25}\text{O}_2$  ( $\text{M}+\text{H}$ ) $^+$ , 393.18491; found, 393.18478.

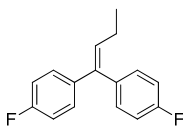

**4,4'-(but-1-ene-1,1-diyl)bis(fluorobenzene)**  $\text{F}$    **(3c)**

Colorless oil;  $^1\text{H}$  NMR ( $\text{CDCl}_3$ , 500 MHz, ppm):  $\delta$  7.20-7.14 (m, 4H), 7.09 (tt,  $J_1 = 2.7$  Hz,  $J_2 = 8.8$  Hz, 2H), 6.98 (tt,  $J_1 = 3.1$  Hz,  $J_2 = 8.7$  Hz, 2H), 6.03 (t,  $J = 7.5$  Hz, 1H), 2.13 (quint,  $J = 7.5$  Hz, 2H), 1.07 (t,  $J = 7.5$  Hz, 3H);  $^{13}\text{C}$  NMR ( $\text{CDCl}_3$ , 125 MHz, ppm):  $\delta$  162.9 (d,  $J = 15.2$  Hz), 160.9 (d,  $J = 15.0$  Hz), 139.0, 138.8 (d,  $J = 3.2$  Hz), 135.9 (d,  $J = 3.3$  Hz), 131.9, 131.4 (d,  $J = 7.9$  Hz), 128.7 (d,  $J = 7.8$  Hz), 115.1 (d,  $J = 21.2$  Hz), 114.9 (d,  $J = 21.2$  Hz), 23.2, 14.5; HRMS calc. for  $\text{C}_{16}\text{H}_{15}\text{F}_2$  ( $\text{M}+\text{H}$ ) $^+$ , 245.11363; found, 245.11323.

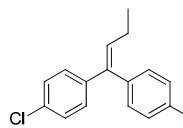

**4,4'-(but-1-ene-1,1-diyl)bis(chlorobenzene)**  $\text{Cl}$    **(3d)**

Colorless oil;  $^1\text{H}$  NMR ( $\text{CDCl}_3$ , 500 MHz, ppm):  $\delta$  7.37 (d,  $J = 8.4$  Hz, 2H), 7.25 (d,  $J = 8.6$  Hz, 2H), 7.14 (d,  $J = 8.6$  Hz, 2H), 7.11 (d,  $J = 8.4$  Hz, 2H), 6.08 (t,  $J = 7.5$  Hz, 1H), 2.13 (quint,  $J = 7.5$  Hz, 2H), 1.06 (t,  $J = 7.5$  Hz, 3H);  $^{13}\text{C}$  NMR ( $\text{CDCl}_3$ , 125 MHz, ppm):  $\delta$  140.9, 138.9, 138.2, 133.0, 132.8, 132.7, 131.2, 128.5, 128.4, 128.3, 23.2, 14.4; HRMS calc. for  $\text{C}_{16}\text{H}_{15}\text{Cl}_2$  ( $\text{M}+\text{H}$ ) $^+$ , 277.05453; found, 277.05431.

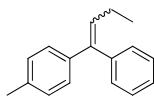

**1-methyl-4-(1-phenylbut-1-enyl)benzene**   **(E/Z) (3e)**

Colorless oil;  $^1\text{H}$  NMR ( $\text{CDCl}_3$ , 500 MHz, ppm):  $\delta$  7.41-7.38 (m, 2H), 7.34-7.20 (m, 10H), 7.16-7.14 (m, 2H), 7.11-7.09 (m, 4H), 6.09-6.06 (m, 2H), 2.42 (s, 3H), 2.36 (s, 3H), 2.20-2.11 (m, 4H), 1.08-1.05 (m, 6H);  $^{13}\text{C}$  NMR ( $\text{CDCl}_3$ , 125 MHz, ppm):  $\delta$  143.1, 140.9, 140.8, 140.5, 140.1, 137.3, 136.5, 136.4, 131.6, 130.9, 129.9, 129.8, 128.8, 128.8, 128.1, 128.0, 127.3, 127.1, 126.8, 126.7, 23.3, 23.2, 21.3, 21.1, 14.6; HRMS calc. for  $\text{C}_{17}\text{H}_{19}$  ( $\text{M}+\text{H}$ ) $^+$ , 223.14813; found, 223.14783.

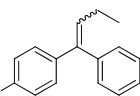

**1-fluoro-4-(1-phenylbut-1-enyl)benzene<sup>F</sup> (E/Z)(3f)**

Colorless oil; <sup>1</sup>H NMR (CDCl<sub>3</sub>, 500 MHz, ppm): δ 7.41-7.38 (m, 1.83H), 7.35-7.27 (m, 3.49H), 7.26-7.16 (m, 8.65H), 7.08 (tt, *J*<sub>1</sub> = 2.2 Hz, *J*<sub>2</sub> = 6.6 Hz, 2H), 6.97 (tt, *J*<sub>1</sub> = 2.2 Hz, *J*<sub>2</sub> = 6.6 Hz, 1.84H), 6.10 (t, *J* = 7.5 Hz, 1H), 6.03 (t, *J* = 7.5 Hz, 0.92H), 2.17-2.11 (m, 3.88H), 1.08-1.05 (m, 5.76H); <sup>13</sup>C NMR (CDCl<sub>3</sub>, 125 MHz, ppm): δ 161.9 (d, *J* = 244.2 Hz), 161.8 (d, *J* = 244.2 Hz), 142.7, 140.1, 140.0, 140.0, 139.0 (d, *J* = 3.2 Hz), 136.1 (d, *J* = 3.4 Hz), 132.1, 131.6, 131.6, 131.5 (d, *J* = 7.8 Hz), 129.8, 128.7 (d, *J* = 7.8 Hz), 128.2 (d, *J* = 10.3 Hz), 127.2, 126.9 (d, *J* = 10.6 Hz), 115.0 (d, *J* = 21.1 Hz), 114.8 (d, *J* = 21.1 Hz), 23.2, 14.5, 14.5; HRMS calc. for C<sub>16</sub>H<sub>16</sub>F (M+H)<sup>+</sup>, 227.12306; found, 227.12267.

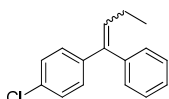

**1-chloro-4-(1-phenylbut-1-enyl)benzene (E/Z)(3g)**

Colorless oil; <sup>1</sup>H NMR (CDCl<sub>3</sub>, 500 MHz, ppm): δ 7.41-7.33 (m, 5H), 7.29-7.21 (m, 7H), 7.19-7.13 (m, 6H), 6.10 (t, *J* = 7.5 Hz, 1H), 6.08 (t, *J* = 7.5 Hz, 1H), 2.17-2.10 (m, 4H), 1.08-1.04 (m, 6H); <sup>13</sup>C NMR (CDCl<sub>3</sub>, 125 MHz, ppm): δ 142.4, 141.3, 140.0, 139.9, 139.8, 138.7, 132.8, 132.6, 132.3, 132.2, 131.3, 129.8, 128.5, 128.4, 128.3, 128.2, 128.2, 127.2, 127.1, 127.0, 23.2, 23.2, 14.5; HRMS calc. for C<sub>16</sub>H<sub>16</sub>Cl (M+H)<sup>+</sup>, 243.09350; found, 243.09303.

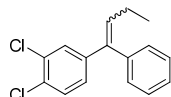

**1,2-dichloro-4-(1-phenylbut-1-enyl)benzene (E/Z)(3h)**

Colorless oil; <sup>1</sup>H NMR (CDCl<sub>3</sub>, 500 MHz, ppm): δ 7.46 (d, *J* = 8.2 Hz, 0.56H), 7.41 (d, *J* = 7.0 Hz, 0.9H), 7.37-7.26 (m, 3.68H), 7.22-7.20 (m, 1.12H), 7.17-7.16 (m, 0.9H), 7.05 (dd, *J*<sub>1</sub> = 2.0 Hz, *J*<sub>2</sub> = 8.2 Hz, 1H), 6.13-6.08 (m, 1H), 2.14 (quint, *J* = 7.5 Hz, 2H), 1.09-1.05 (m, 3H); <sup>13</sup>C NMR (CDCl<sub>3</sub>, 125 MHz, ppm): δ 143.0, 141.8, 140.3, 139.1, 138.9, 133.4, 133.0, 132.3, 132.2, 131.7, 131.0, 130.6, 130.2, 129.9, 129.8, 129.4, 129.0, 128.4, 128.3, 127.3, 127.2, 127.2, 126.6, 23.3, 23.2, 14.4, 14.4; HRMS calc. for C<sub>16</sub>H<sub>15</sub>Cl<sub>2</sub> (M+H)<sup>+</sup>, 277.05453; found, 277.05406.

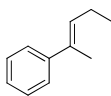

**(E)-pent-2-en-2-ylbenzene E-(3i)**

Colorless oil; The spectroscopical data correspond to those previously reported in the literature.<sup>[1a]</sup> <sup>1</sup>H NMR (CDCl<sub>3</sub>, 500 MHz, ppm): δ 7.44-7.42 (m, 2H), 7.35 (t, *J* = 7.4 Hz, 2H), 7.26 (tt, *J*<sub>1</sub> = 1.3 Hz, *J*<sub>2</sub> = 7.3 Hz, 1H), 5.83 (tq, *J*<sub>1</sub> = 1.3 Hz, *J*<sub>2</sub> = 7.5 Hz, 1H), 2.26 (quint, *J* = 7.5 Hz, 2H), 2.08 (d, *J* = 1.2 Hz, 3H), 1.11 (t, *J* = 7.5 Hz, 3H); <sup>13</sup>C NMR (CDCl<sub>3</sub>, 125 MHz, ppm): δ 144.0, 134.1, 130.3, 128.2, 126.4, 125.6, 22.1, 15.6, 14.1; MS (EI) *m/z*: 146.1, 131.1, 115.0, 91.1.

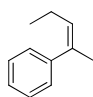

**(Z)-pent-2-en-2-ylbenzene Z-(3i)**

Colorless oil; <sup>1</sup>H NMR (CDCl<sub>3</sub>, 500 MHz, ppm): δ 7.35 (t, *J* = 7.4 Hz, 2H), 7.25 (tt, *J*

= 1.3 Hz,  $J_2 = 7.5$  Hz, 1H), 7.22-7.20 (m, 2H), 5.48 (td,  $J_1 = 1.3$  Hz,  $J_2 = 7.4$  Hz, 1H), 2.05 (d,  $J = 1.7$  Hz, 3H), 2.01 (quintd,  $J_1 = 1.1$  Hz,  $J_2 = 7.4$  Hz, 2H), 0.96 (t,  $J = 7.4$  Hz, 3H);  $^{13}\text{C}$  NMR ( $\text{CDCl}_3$ , 125 MHz, ppm):  $\delta$  142.2, 135.4, 129.5, 128.0, 127.9, 126.4, 25.5, 22.4, 14.7; HRMS calc. for  $\text{C}_{11}\text{H}_{15}$  ( $\text{M}+\text{H}$ ) $^+$ , 147.11683; found, 147.11686.

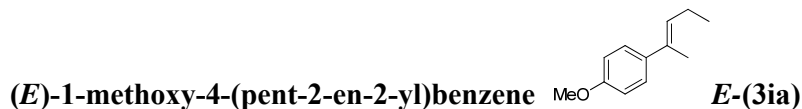

Colorless oil;  $^1\text{H}$  NMR ( $\text{CDCl}_3$ , 500 MHz, ppm):  $\delta$  7.34 (dt,  $J_1 = 3.1$  Hz,  $J_2 = 8.9$  Hz, 2H), 6.87 (dt,  $J_1 = 3.1$  Hz,  $J_2 = 8.9$  Hz, 2H), 5.72 (td,  $J_1 = 1.3$  Hz,  $J_2 = 7.5$  Hz, 1H), 3.83 (s, 3H), 2.22 (quint,  $J = 7.5$  Hz, 2H), 2.03 (d,  $J = 1.0$  Hz, 3H), 1.08 (t,  $J = 7.5$  Hz, 3H);  $^{13}\text{C}$  NMR ( $\text{CDCl}_3$ , 125 MHz, ppm):  $\delta$  158.3, 136.6, 133.3, 128.7, 126.6, 113.5, 55.3, 22.0, 15.7, 14.2; HRMS calc. for  $\text{C}_{12}\text{H}_{17}\text{O}$  ( $\text{M}+\text{H}$ ) $^+$ , 177.12739; found, 177.12710.

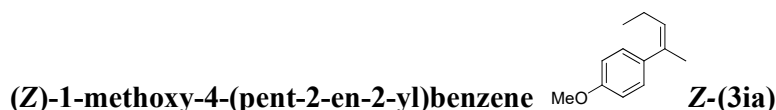

Colorless oil;  $^1\text{H}$  NMR ( $\text{CDCl}_3$ , 500 MHz, ppm):  $\delta$  7.15 (dt,  $J_1 = 2.9$  Hz,  $J_2 = 8.8$  Hz, 2H), 6.89 (dt,  $J_1 = 2.9$  Hz,  $J_2 = 8.8$  Hz, 2H), 5.44 (tq,  $J_1 = 1.4$  Hz,  $J_2 = 7.5$  Hz, 1H), 3.84 (s, 3H), 2.05-1.99 (m, 5H), 0.96 (t,  $J = 7.5$  Hz, 3H);  $^{13}\text{C}$  NMR ( $\text{CDCl}_3$ , 125 MHz, ppm):  $\delta$  158.1, 134.8, 134.5, 129.2, 129.0, 113.4, 55.2, 25.6, 22.5, 14.8; HRMS calc. for  $\text{C}_{12}\text{H}_{17}\text{O}$  ( $\text{M}+\text{H}$ ) $^+$ , 177.12739; found, 177.12712.

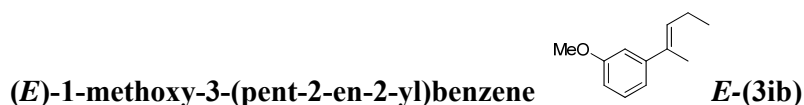

Colorless oil;  $^1\text{H}$  NMR ( $\text{CDCl}_3$ , 500 MHz, ppm):  $\delta$  7.25 (t,  $J = 8.0$  Hz, 1H), 7.03-7.00 (m, 1H), 6.95 (t,  $J = 2.4$  Hz, 1H), 6.81-6.79 (m, 1H), 5.72 (td,  $J_1 = 1.3$  Hz,  $J_2 = 7.1$  Hz, 1H), 3.85 (s, 3H), 2.24 (quint,  $J = 7.5$  Hz, 2H), 2.05 (d,  $J = 1.1$  Hz, 3H), 1.09 (t,  $J = 7.5$  Hz, 3H);  $^{13}\text{C}$  NMR ( $\text{CDCl}_3$ , 125 MHz, ppm):  $\delta$  159.5, 145.6, 133.9, 130.5, 129.0, 118.2, 111.7, 111.6, 55.2, 22.0, 15.7, 14.1; HRMS calc. for  $\text{C}_{12}\text{H}_{17}\text{O}$  ( $\text{M}+\text{H}$ ) $^+$ , 177.12739; found, 177.12717.

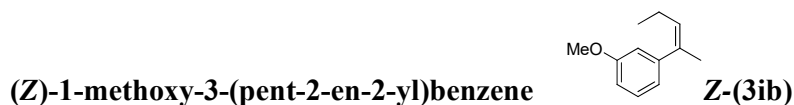

Colorless oil;  $^1\text{H}$  NMR ( $\text{CDCl}_3$ , 500 MHz, ppm):  $\delta$  7.27 (t,  $J = 7.9$  Hz, 1H), 6.82-6.79 (m, 2H), 6.76 (t,  $J = 1.7$  Hz, 1H), 5.44 (td,  $J_1 = 1.4$  Hz,  $J_2 = 7.5$  Hz, 1H), 3.84 (s, 3H), 2.04-1.98 (m, 5H), 0.96 (t,  $J = 7.5$  Hz, 3H);  $^{13}\text{C}$  NMR ( $\text{CDCl}_3$ , 125 MHz, ppm):  $\delta$  159.3, 143.7, 135.3, 129.6, 129.0, 120.5, 113.7, 111.7, 55.2, 25.5, 22.5, 14.7; HRMS calc. for  $\text{C}_{12}\text{H}_{17}\text{O}$  ( $\text{M}+\text{H}$ ) $^+$ , 177.12739; found, 177.12706.

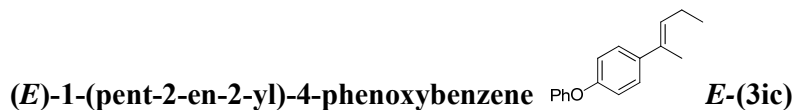

Colorless oil;  $^1\text{H}$  NMR ( $\text{CDCl}_3$ , 500 MHz, ppm):  $\delta$  7.40-7.34 (m, 4H), 7.18 (tt,  $J_1 = 2.8$  Hz,  $J_2 = 7.4$  Hz, 1H), 7.05-7.03 (m, 2H), 6.99 (d,  $J = 8.8$  Hz, 2H), 5.78 (tq,  $J_1 = 1.2$

Hz,  $J_2 = 7.2$  Hz, 1H), 2.24 (quint,  $J = 7.5$  Hz, 2H), 2.05 (d,  $J = 1.2$  Hz, 3H), 1.09 (t,  $J = 7.5$  Hz, 3H);  $^{13}\text{C}$  NMR ( $\text{CDCl}_3$ , 125 MHz, ppm):  $\delta$  157.5, 155.7, 139.2, 133.3, 129.7, 129.7, 126.8, 123.0, 118.7, 118.6, 22.1, 15.7, 14.2; HRMS calc.  $\text{C}_{17}\text{H}_{19}\text{O}$  ( $\text{M}+\text{H}$ ) $^+$ , 239.14304; found, 239.14258.

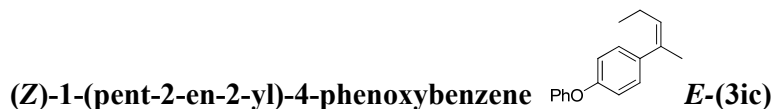

Colorless oil;  $^1\text{H}$  NMR ( $\text{CDCl}_3$ , 500 MHz, ppm):  $\delta$  7.38-7.35 (m, 2H), 7.18 (dt,  $J_1 = 2.8$  Hz,  $J_2 = 8.7$  Hz, 2H), 7.14-7.11 (m, 1H), 7.07-7.05 (m, 2H), 6.99 (dt,  $J_1 = 2.8$  Hz,  $J_2 = 8.7$  Hz, 2H), 5.47 (td,  $J_1 = 1.5$  Hz,  $J_2 = 7.4$  Hz, 1H), 2.07-2.01 (m, 5H), 0.98 (t,  $J = 7.5$  Hz, 3H);  $^{13}\text{C}$  NMR ( $\text{CDCl}_3$ , 125 MHz, ppm):  $\delta$  157.3, 155.7, 137.1, 134.6, 129.7, 129.6, 129.3, 123.2, 118.9, 118.3, 25.5, 22.5, 14.7; HRMS calc.  $\text{C}_{17}\text{H}_{19}\text{O}$  ( $\text{M}+\text{H}$ ) $^+$ , 239.14304; found, 239.14264.

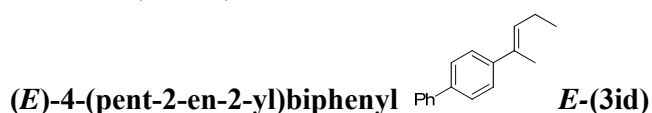

White solid;  $^1\text{H}$  NMR ( $\text{CDCl}_3$ , 500 MHz, ppm):  $\delta$  7.63 (d,  $J = 8.4$  Hz, 2H), 7.58 (d,  $J = 8.4$  Hz, 2H), 7.51-7.45 (m, 4H), 7.36 (t,  $J = 7.4$  Hz, 1H), 5.89 (td,  $J_1 = 1.2$  Hz,  $J_2 = 7.1$  Hz, 1H), 2.28 (quint,  $J = 7.1$  Hz, 2H), 2.10 (s, 3H), 1.12 (t,  $J = 7.5$  Hz, 3H);  $^{13}\text{C}$  NMR ( $\text{CDCl}_3$ , 125 MHz, ppm):  $\delta$  142.9, 140.9, 139.2, 133.6, 130.4, 128.7, 127.1, 127.0, 126.9, 125.9, 22.1, 15.6, 14.1; HRMS calc.  $\text{C}_{17}\text{H}_{19}$  ( $\text{M}+\text{H}$ ) $^+$ , 223.14813; found, 223.14774.

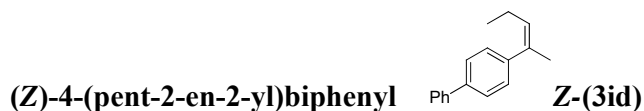

Colorless oil;  $^1\text{H}$  NMR ( $\text{CDCl}_3$ , 500 MHz, ppm):  $\delta$  7.64 (d,  $J = 8.4$  Hz, 2H), 7.58 (d,  $J = 8.4$  Hz, 2H), 7.47 (t,  $J = 7.5$  Hz, 2H), 7.37 (t,  $J = 7.4$  Hz, 1H), 7.30 (d,  $J = 8.3$  Hz, 2H), 5.52 (td,  $J_1 = 1.4$  Hz,  $J_2 = 7.4$  Hz, 1H), 2.11-2.06 (m, 5H), 1.00 (t,  $J = 7.5$  Hz, 3H);  $^{13}\text{C}$  NMR ( $\text{CDCl}_3$ , 125 MHz, ppm):  $\delta$  141.1, 141.0, 139.2, 134.9, 129.9, 128.7, 128.4, 127.1, 127.0, 126.7, 25.4, 22.6, 14.8; HRMS calc.  $\text{C}_{17}\text{H}_{19}$  ( $\text{M}+\text{H}$ ) $^+$ , 223.14813; found, 223.14760.

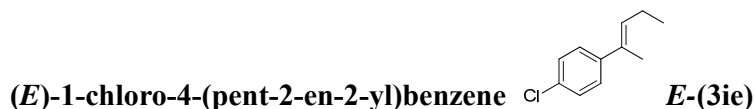

Colorless oil;  $^1\text{H}$  NMR ( $\text{CDCl}_3$ , 500 MHz, ppm):  $\delta$  7.33 (dt,  $J_1 = 2.3$  Hz,  $J_2 = 8.8$  Hz, 2H), 7.29 (dt,  $J_1 = 2.3$  Hz,  $J_2 = 8.8$  Hz, 2H), 5.79 (tq,  $J_1 = 1.3$  Hz,  $J_2 = 7.1$  Hz, 1H), 2.23 (quint,  $J = 7.5$  Hz, 2H), 2.03 (d,  $J = 1.3$  Hz, 3H), 1.09 (t,  $J = 7.5$  Hz, 3H);  $^{13}\text{C}$  NMR ( $\text{CDCl}_3$ , 125 MHz, ppm):  $\delta$  142.4, 133.0, 132.1, 130.8, 128.2, 126.9, 22.1, 15.6, 14.0; HRMS calc. for  $\text{C}_{11}\text{H}_{14}\text{Cl}$  ( $\text{M}+\text{H}$ ) $^+$ , 181.07785; found, 181.07753.

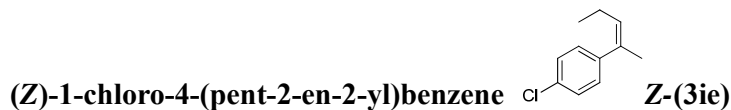

Colorless oil;  $^1\text{H}$  NMR ( $\text{CDCl}_3$ , 500 MHz, ppm):  $\delta$  7.31 (dt,  $J_1 = 2.5$  Hz,  $J_2 = 8.5$  Hz, 2H), 7.13 (dt,  $J_1 = 2.5$  Hz,  $J_2 = 8.5$  Hz, 2H), 5.49 (td,  $J_1 = 1.3$  Hz,  $J_2 = 7.4$  Hz, 1H),

2.02 (d,  $J = 1.3$  Hz, 3H), 1.98 (quint,  $J = 7.5$  Hz, 2H), 0.95 (t,  $J = 7.5$  Hz, 3H);  $^{13}\text{C}$  NMR ( $\text{CDCl}_3$ , 125 MHz, ppm):  $\delta$  140.5, 134.2, 132.1, 130.2, 129.3, 128.2, 25.3, 22.4, 14.6; HRMS calc. for  $\text{C}_{11}\text{H}_{14}\text{Cl}$  ( $\text{M}+\text{H}$ ) $^+$ , 181.07785; found, 181.07769.

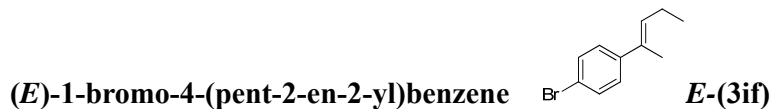

Colorless oil;  $^1\text{H}$  NMR ( $\text{CDCl}_3$ , 500 MHz, ppm):  $\delta$  7.44 (dt,  $J_1 = 2.6$  Hz,  $J_2 = 8.7$  Hz, 2H), 7.27 (dt,  $J_1 = 2.6$  Hz,  $J_2 = 8.7$  Hz, 2H), 5.79 (tq,  $J_1 = 1.3$  Hz,  $J_2 = 7.1$  Hz, 1H), 2.22 (quint,  $J = 7.6$  Hz, 2H), 2.02 (d,  $J = 1.2$  Hz, 3H), 1.08 (t,  $J = 7.6$  Hz, 3H);  $^{13}\text{C}$  NMR ( $\text{CDCl}_3$ , 125 MHz, ppm):  $\delta$  142.8, 133.1, 131.1, 130.9, 127.2, 120.2, 22.1, 15.5, 14.0; HRMS calc. for  $\text{C}_{11}\text{H}_{14}\text{Br}$  ( $\text{M}+\text{H}$ ) $^+$ , 225.02734; found, 225.02725.

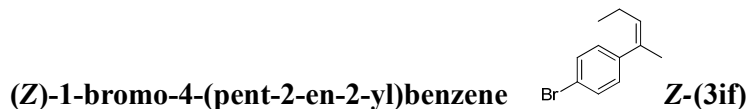

Colorless oil;  $^1\text{H}$  NMR ( $\text{CDCl}_3$ , 500 MHz, ppm):  $\delta$  7.47 (dt,  $J_1 = 2.5$  Hz,  $J_2 = 8.5$  Hz, 2H), 7.08 (dt,  $J_1 = 2.5$  Hz,  $J_2 = 8.4$  Hz, 2H), 5.49 (td,  $J_1 = 1.4$  Hz,  $J_2 = 7.4$  Hz, 1H), 2.01 (d,  $J = 1.4$  Hz, 3H), 2.00-1.94 (m, 2H), 0.95 (t,  $J = 7.5$  Hz, 3H);  $^{13}\text{C}$  NMR ( $\text{CDCl}_3$ , 125 MHz, ppm):  $\delta$  141.0, 134.3, 131.1, 130.2, 129.7, 120.2, 25.3, 22.4, 14.6; HRMS calc. for  $\text{C}_{11}\text{H}_{14}\text{Br}$  ( $\text{M}+\text{H}$ ) $^+$ , 225.02734; found, 225.02727.

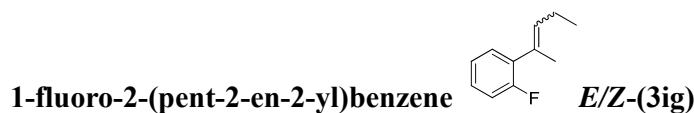

Colorless oil;  $^1\text{H}$  NMR ( $\text{CDCl}_3$ , 500 MHz, ppm):  $\delta$  7.28-7.19 (m, 2.41H), 7.17-7.01 (m, 3.37H), 5.63-5.58 (m, 1.45H), 2.23 (quint,  $J = 7.4$  Hz, 2.04H), 2.03 (s, 4.39H), 1.89 (quint,  $J = 7.4$  Hz, 0.9H), 1.09 (t,  $J = 7.5$  Hz, 3H), 0.95 (t,  $J = 7.5$  Hz, 1.37H);  $^{13}\text{C}$  NMR ( $\text{CDCl}_3$ , 125 MHz, ppm):  $\delta$  159.9 (d,  $J = 244.8$  Hz), 159.5 (d,  $J = 243.4$  Hz), 133.5 (d,  $J = 2.0$  Hz), 132.8 (d,  $J = 14.1$  Hz), 131.7, 130.7, 130.4 (d,  $J = 4.6$  Hz), 129.9, 129.7 (d,  $J = 4.7$  Hz), 129.5 (d,  $J = 16.9$  Hz), 128.2 (d,  $J = 8.0$  Hz), 127.9 (d,  $J = 8.2$  Hz), 123.8 (d,  $J = 3.5$  Hz), 123.7 (d,  $J = 3.5$  Hz), 115.6 (d,  $J = 22.7$  Hz), 115.5 (d,  $J = 22.6$  Hz), 24.7 (d,  $J = 1.6$  Hz), 22.7, 21.7, 16.7 (d,  $J = 3.7$  Hz), 14.2, 13.9; HRMS calc.  $\text{C}_{11}\text{H}_{14}\text{F}$  ( $\text{M}+\text{H}$ ) $^+$ , 165.10741; found, 165.10719.

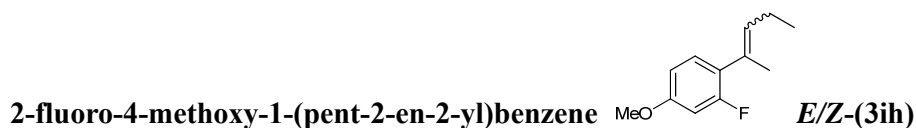

Colorless oil;  $^1\text{H}$  NMR ( $\text{CDCl}_3$ , 500 MHz, ppm):  $\delta$  7.15 (t,  $J = 8.7$  Hz, 0.66H), 7.04 (t,  $J = 8.4$  Hz, 0.34H), 6.71-6.59 (m, 2H), 5.56 (t,  $J = 7.4$  Hz, 1H), 3.82 (s, 1.02H), 3.81 (s, 1.98H), 2.21 (quint,  $J = 7.5$  Hz, 1.32H), 2.00 (s, 3H), 1.88 (quint,  $J = 7.5$  Hz, 0.68H), 1.07 (t,  $J = 7.5$  Hz, 1.98H), 0.94 (t,  $J = 7.5$  Hz, 1.02H);  $^{13}\text{C}$  NMR ( $\text{CDCl}_3$ , 125 MHz, ppm):  $\delta$  160.4 (d,  $J = 244.9$  Hz), 159.9 (d,  $J = 243.9$  Hz), 159.5 (d,  $J = 10.6$  Hz), 159.4 (d,  $J = 10.8$  Hz), 132.6 (d,  $J = 2.2$  Hz), 131.6, 130.6 (d,  $J = 6.6$  Hz), 130.2 (d,  $J = 1.1$  Hz), 130.0 (d,  $J = 6.6$  Hz), 129.6, 125.1 (d,  $J = 14.5$  Hz), 121.5 (d,  $J = 17.5$  Hz), 109.6 (d,  $J = 3.1$  Hz), 109.5 (d,  $J = 2.8$  Hz), 101.7 (d,  $J = 26.7$  Hz), 101.6 (d,  $J = 26.4$  Hz), 55.53, 55.50, 24.8 (d,  $J = 1.7$  Hz), 22.7, 21.7, 16.8 (d,  $J = 3.6$  Hz), 14.2, 14.0;

HRMS calc. C<sub>12</sub>H<sub>16</sub>OF (M+H)<sup>+</sup>, 195.11797, found, 195.11792.

**(E)-methyl(4-(pent-2-en-2-yl)phenyl)sulfane**

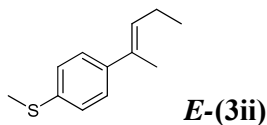

Colorless oil; <sup>1</sup>H NMR (CDCl<sub>3</sub>, 500 MHz, ppm): δ 7.34 (d, *J* = 8.5 Hz, 2H), 7.14 (d, *J* = 8.5 Hz, 2H), 5.79 (dt, *J*<sub>1</sub> = 1.4 Hz, *J*<sub>2</sub> = 7.2 Hz, 1H), 2.51 (s, 3H), 2.23 (quint, *J* = 7.5 Hz, 2H), 2.03 (d, *J* = 1.2 Hz, 3H), 1.08 (t, *J* = 7.5 Hz, 3H); <sup>13</sup>C NMR (CDCl<sub>3</sub>, 125 MHz, ppm): δ 141.0, 136.1, 133.4, 130.0, 126.7, 126.0, 22.1, 16.2, 15.5, 14.1; HRMS calc. C<sub>12</sub>H<sub>16</sub>S (M+H)<sup>+</sup>, 193.10455, found, 193.10444.

**(Z)-methyl(4-(pent-2-en-2-yl)phenyl)sulfane**

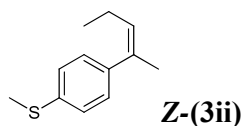

Colorless oil; <sup>1</sup>H NMR (CDCl<sub>3</sub>, 500 MHz, ppm): δ 7.25 (d, *J* = 8.4 Hz, 2H), 7.14 (d, *J* = 8.4 Hz, 2H), 5.47 (dt, *J*<sub>1</sub> = 1.8 Hz, *J*<sub>2</sub> = 7.5 Hz, 1H), 2.52 (s, 3H), 2.04-1.98 (m, 5H), 0.96 (t, *J* = 7.5 Hz, 3H); <sup>13</sup>C NMR (CDCl<sub>3</sub>, 125 MHz, ppm): δ 139.1, 136.1, 134.7, 129.8, 128.5, 126.4, 25.3, 22.5, 16.0, 14.7; HRMS calc. C<sub>12</sub>H<sub>16</sub>S (M+H)<sup>+</sup>, 193.10455, found, 193.10449.

**2-(4-(pent-2-en-2-yl)phenyl)propan-2-ol**

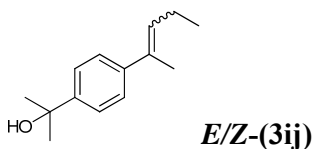

Colorless oil; <sup>1</sup>H NMR (CDCl<sub>3</sub>, 500 MHz, ppm): δ 7.48-7.44 (m, 3.14H), 7.39 (d, *J* = 8.5 Hz, 2H), 7.19 (d, *J* = 8.3 Hz, 1.14H), 5.82 (t, *J*<sub>1</sub> = 1.4 Hz, *J*<sub>2</sub> = 7.2 Hz, 1H), 5.48 (t, *J*<sub>1</sub> = 1.4 Hz, *J*<sub>2</sub> = 7.4 Hz, 0.57H), 2.24 (quint, *J* = 7.5 Hz, 2H), 2.06-2.00 (m, 5.75H), 1.77 (brs, 1.58H), 1.63 (s, 3.42H), 1.61 (s, 6H), 1.08 (t, *J* = 7.5 Hz, 3H), 0.97 (t, *J* = 7.5 Hz, 1.71H); <sup>13</sup>C NMR (CDCl<sub>3</sub>, 125 MHz, ppm): δ 147.3, 147.1, 142.4, 140.5, 135.0, 133.6, 130.2, 129.7, 127.8, 125.4, 124.2, 124.1, 72.4, 72.4, 31.7, 25.4, 22.5, 22.1, 15.6, 14.7, 14.1; HRMS calc. C<sub>14</sub>H<sub>20</sub>ONa(M+Na)<sup>+</sup>, 227.14064, found, 227.14064.

**1-(1-methoxyethyl)-4-(pent-2-en-2-yl)benzene**

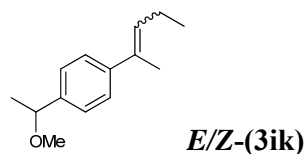

Colorless oil; <sup>1</sup>H NMR (CDCl<sub>3</sub>, 500 MHz, ppm): δ 7.39 (d, *J* = 8.3 Hz, 2H), 7.29-7.26 (m, 2.88H), 7.19 (d, *J* = 8.1 Hz, 0.88H), 5.82 (t, *J*<sub>1</sub> = 1.4 Hz, *J*<sub>2</sub> = 7.2 Hz, 1H), 5.47 (t, *J*<sub>1</sub> = 1.4 Hz, *J*<sub>2</sub> = 7.4 Hz, 0.44H), 4.34-4.29 (m, 1.44H), 3.27 (s, 1.32H), 3.25 (s, 3H), 2.24 (quint, *J* = 7.5 Hz, 2H), 2.06-2.01 (m, 5.07H), 1.48-1.45 (m, 4.34H), 1.08 (t, *J* = 7.5 Hz, 3H), 0.97 (t, *J* = 7.5 Hz, 1.32H); <sup>13</sup>C NMR (CDCl<sub>3</sub>, 125 MHz, ppm): δ 143.2, 141.6, 141.5, 141.3, 135.1, 133.7, 130.2, 129.6, 128.0, 126.0, 125.8, 125.6, 79.5, 79.4, 56.5, 56.4, 25.5, 23.8, 23.7, 22.5, 22.1, 15.6, 14.7, 14.1; HRMS calc. C<sub>14</sub>H<sub>20</sub>ONa(M+Na)<sup>+</sup>, 227.14064, found, 227.14060.

**(E)-1-(4-(pent-2-en-2-yl)phenyl)piperidine**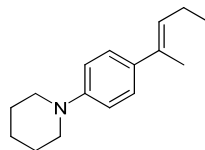**E-(3il)**

Colorless oil;  $^1\text{H}$  NMR ( $\text{CDCl}_3$ , 500 MHz, ppm):  $\delta$  7.32 (d,  $J = 8.8$  Hz, 2H), 7.50 (d,  $J = 8.8$  Hz, 2H), 5.73 (dt,  $J_1 = 1.4$  Hz,  $J_2 = 7.2$  Hz, 1H), 3.17 (t,  $J = 5.5$  Hz, 4H), 2.22 (quint,  $J = 7.5$  Hz, 2H), 2.06 (d,  $J = 1.2$  Hz, 3H), 1.76-1.72 (m, 4H), 1.62-1.58 (m, 2H), 1.08 (t,  $J = 7.5$  Hz, 3H);  $^{13}\text{C}$  NMR ( $\text{CDCl}_3$ , 125 MHz, ppm):  $\delta$  150.9, 134.7, 133.4, 127.9, 126.1, 116.2, 50.7, 25.9, 24.3, 22.0, 15.5, 14.3; HRMS calc.  $\text{C}_{16}\text{H}_{24}\text{N}$  ( $\text{M}+\text{H}$ ) $^+$ , 230.19033, found, 230.19014.

**(Z)-1-(4-(pent-2-en-2-yl)phenyl)piperidine**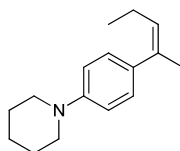**Z-(3il)**

Colorless oil;  $^1\text{H}$  NMR ( $\text{CDCl}_3$ , 500 MHz, ppm):  $\delta$  7.12 (d,  $J = 8.7$  Hz, 2H), 6.92 (d,  $J = 8.8$  Hz, 2H), 5.41 (dt,  $J_1 = 1.4$  Hz,  $J_2 = 7.2$  Hz, 1H), 3.18 (t,  $J = 5.5$  Hz, 4H), 2.08-2.04 (m, 2H), 2.03 (d,  $J = 1.4$  Hz, 3H), 1.76-1.72 (m, 4H), 1.62-1.59 (m, 2H), 0.96 (t,  $J = 7.5$  Hz, 3H);  $^{13}\text{C}$  NMR ( $\text{CDCl}_3$ , 125 MHz, ppm):  $\delta$  150.6, 134.9, 132.7, 128.8, 128.6, 115.8, 50.6, 25.9, 25.4, 24.3, 22.5, 14.8; HRMS calc.  $\text{C}_{16}\text{H}_{24}\text{N}$  ( $\text{M}+\text{H}$ ) $^+$ , 230.19033, found, 230.19012.

**(E)-1-(pent-2-en-2-yl)-4-(phenylethynyl)benzene**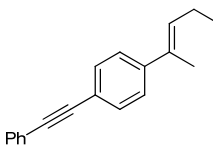**E-(3im)**

Colorless oil;  $^1\text{H}$  NMR ( $\text{CDCl}_3$ , 500 MHz, ppm):  $\delta$  7.57-7.55 (m, 2H), 7.50 (d,  $J = 8.4$  Hz, 2H), 7.42-7.35 (m, 5H), 5.88 (dt,  $J_1 = 1.4$  Hz,  $J_2 = 7.2$  Hz, 1H), 2.26 (quint,  $J = 7.5$  Hz, 2H), 2.06 (d,  $J = 1.2$  Hz, 3H), 1.10 (t,  $J = 7.5$  Hz, 3H);  $^{13}\text{C}$  NMR ( $\text{CDCl}_3$ , 125 MHz, ppm):  $\delta$  143.7, 133.5, 131.6, 131.4, 131.2, 128.3, 128.1, 125.4, 123.5, 121.1, 89.6, 89.5, 22.2, 15.4, 14.0; HRMS calc.  $\text{C}_{19}\text{H}_{19}$  ( $\text{M}+\text{H}$ ) $^+$ , 247.14813, found, 247.14718.

**(Z)-1-(pent-2-en-2-yl)-4-(phenylethynyl)benzene**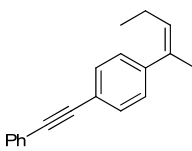**Z-(3im)**

Colorless oil;  $^1\text{H}$  NMR ( $\text{CDCl}_3$ , 500 MHz, ppm):  $\delta$  7.57-7.55 (m, 2H), 7.52 (d,  $J = 8.3$  Hz, 2H), 7.39-7.35 (m, 3H), 7.20 (d,  $J = 8.3$  Hz, 2H), 5.51 (dt,  $J_1 = 1.5$  Hz,  $J_2 = 7.4$  Hz, 1H), 2.05 (d,  $J = 1.4$  Hz, 3H), 2.04-1.99 (m, 2H), 0.97 (t,  $J = 7.5$  Hz, 3H);  $^{13}\text{C}$  NMR ( $\text{CDCl}_3$ , 125 MHz, ppm):  $\delta$  142.3, 134.8, 131.6, 131.3, 130.3, 128.3, 128.2, 128.0, 123.4, 121.2, 89.5, 89.2, 25.2, 22.5, 14.7; HRMS calc.  $\text{C}_{19}\text{H}_{19}$  ( $\text{M}+\text{H}$ ) $^+$ , 247.14813, found, 247.14729.

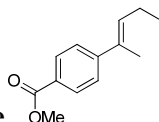

**(E)-methyl 4-(pent-2-en-2-yl)benzoate** **E-(3in)**

Colorless oil;  $^1\text{H NMR}$  ( $\text{CDCl}_3$ , 500 MHz, ppm):  $\delta$  7.99 (d,  $J = 8.7$  Hz, 2H), 7.46 (d,  $J = 8.7$  Hz, 2H), 5.92 (td,  $J_1 = 1.4$  Hz,  $J_2 = 7.2$  Hz, 1H), 3.93 (s, 3H), 2.26 (quint,  $J = 7.5$  Hz, 2H), 2.06 (d,  $J = 1.2$  Hz, 3H), 1.10 (t,  $J = 7.5$  Hz, 3H);  $^{13}\text{C NMR}$  ( $\text{CDCl}_3$ , 125 MHz, ppm):  $\delta$  167.1, 148.4, 133.4, 132.5, 129.5, 128.0, 125.4, 52.0, 22.2, 15.4, 13.9; HRMS calc. for  $\text{C}_{13}\text{H}_{16}\text{O}_2\text{Na}$  ( $\text{M}+\text{Na}$ ) $^+$ , 227.1043; found, 227.1047.

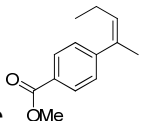

**(Z)-methyl 4-(pent-2-en-2-yl)benzoate** **Z-(3in)**

Colorless oil;  $^1\text{H NMR}$  ( $\text{CDCl}_3$ , 500 MHz, ppm):  $\delta$  8.02 (d,  $J = 8.2$  Hz, 2H), 7.27 (d,  $J = 8.2$  Hz, 2H), 5.53 (td,  $J_1 = 1.3$  Hz,  $J_2 = 7.4$  Hz, 1H), 3.94 (s, 3H), 2.05 (d,  $J = 1.1$  Hz, 3H), 1.99 (quint,  $J = 7.5$  Hz, 2H), 0.96 (t,  $J = 7.5$  Hz, 3H);  $^{13}\text{C NMR}$  ( $\text{CDCl}_3$ , 125 MHz, ppm):  $\delta$  167.1, 147.2, 134.6, 130.8, 129.4, 128.2, 128.0, 52.0, 25.1, 22.5, 14.6; HRMS calc. for  $\text{C}_{13}\text{H}_{16}\text{O}_2\text{Na}$  ( $\text{M}+\text{Na}$ ) $^+$ , 227.1043; found, 227.1045.

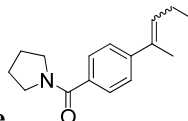

**(4-(pent-2-en-2-yl)phenyl)(pyrrolidin-1-yl)methanone** **Z/E-(3io)**

Colorless oil;  $^1\text{H NMR}$  ( $\text{CDCl}_3$ , 500 MHz, ppm):  $\delta$  7.51-7.48 (m, 2.75H), 7.41 (d,  $J = 8.1$  Hz, 2H), 7.21 (d,  $J = 7.4$  Hz, 0.82H), 5.84 (t,  $J = 7.4$  Hz, 1H), 5.50 (t,  $J = 7.4$  Hz, 0.41H), 3.69-3.65 (m, 2.82H), 3.51-3.46 (m, 2.82H), 2.24 (quint,  $J = 7.5$  Hz, 2H), 2.04 (s, 3H), 2.03 (s, 1.22H), 2.00-1.95 (m, 3.45H), 1.92-1.86 (m, 2.89H), 1.08 (t,  $J = 7.5$  Hz, 1H), 0.95 (t,  $J = 7.4$  Hz, 1.24H);  $^{13}\text{C NMR}$  ( $\text{CDCl}_3$ , 125 MHz, ppm):  $\delta$  169.67, 169.66, 145.39, 143.85, 135.21, 135.08, 134.75, 133.47, 131.36, 130.28, 127.80, 127.16, 126.95, 125.27, 49.65, 46.21, 26.45, 25.26, 24.48, 22.42, 22.12, 15.50, 14.64, 14.02; HRMS calc. for  $\text{C}_{16}\text{H}_{22}\text{ON}$  ( $\text{M}+\text{H}$ ) $^+$ , 244.16959; found, 244.17014.

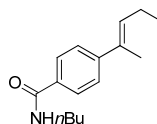

**(E)-N-butyl-4-(pent-2-en-2-yl)benzamide** **E-(3ip)**

Colorless oil;  $^1\text{H NMR}$  ( $\text{CDCl}_3$ , 500 MHz, ppm):  $\delta$  7.72 (d,  $J = 8.5$  Hz, 2H), 7.44 (d,  $J = 8.5$  Hz, 2H), 6.14 (s, 1H), 5.87 (td,  $J_1 = 1.4$  Hz,  $J_2 = 7.5$  Hz, 1H), 3.50-3.46 (m, 2H), 2.25 (quint,  $J = 7.5$  Hz, 2H), 2.05 (d,  $J = 1.2$  Hz, 2H), 1.65-1.59 (m, 2H), 1.47-1.40 (m, 2H), 1.09 (t,  $J = 7.5$  Hz, 3H), 0.98 (t,  $J = 7.5$  Hz, 3H);  $^{13}\text{C NMR}$  ( $\text{CDCl}_3$ , 125 MHz, ppm):  $\delta$  167.3, 146.9, 133.3, 132.6, 131.9, 126.7, 125.6, 39.8, 31.8, 22.2, 20.2, 15.5, 14.0, 13.8; HRMS calc. for  $\text{C}_{16}\text{H}_{24}\text{ON}$  ( $\text{M}+\text{H}$ ) $^+$ , 246.18524; found, 246.18564.

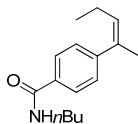

**(Z)-N-butyl-4-(pent-2-en-2-yl)benzamide** **Z-(3ip)**



Colorless oil;  $^1\text{H}$  NMR ( $\text{CDCl}_3$ , 500 MHz, ppm):  $\delta$  7.74 (d,  $J = 8.3$  Hz, 2H), 7.26 (d,  $J = 8.3$  Hz, 2H), 6.12 (s, 1H), 5.52 (td,  $J_1 = 1.4$  Hz,  $J_2 = 7.5$  Hz, 1H), 3.51-3.47 (m, 2H), 2.04 (d,  $J = 1.4$  Hz, 2H), 1.97 (quintd,  $J_1 = 1.3$  Hz,  $J_2 = 7.5$  Hz, 2H), 1.66-1.60 (m, 2H), 1.48-1.41 (m, 2H), 0.99 (t,  $J = 7.5$  Hz, 3H), 0.95 (t,  $J = 7.5$  Hz, 3H);  $^{13}\text{C}$  NMR ( $\text{CDCl}_3$ , 125 MHz, ppm):  $\delta$  167.4, 145.5, 134.6, 132.9, 130.5, 128.2, 126.6, 39.8, 31.8, 25.2, 22.4, 20.2, 14.6, 13.8; HRMS calc. for  $\text{C}_{16}\text{H}_{24}\text{ON}$  ( $\text{M}+\text{H}$ ) $^+$ , 246.18524; found, 246.18578.

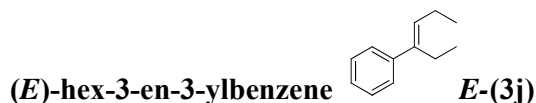

Colorless oil;  $^1\text{H}$  NMR ( $\text{CDCl}_3$ , 500 MHz, ppm):  $\delta$  7.39 (d,  $J = 7.7$  Hz, 2H), 7.33 (t,  $J = 7.4$  Hz, 2H), 7.24 (t,  $J = 7.4$  Hz, 1H), 5.67 (t,  $J = 7.2$  Hz, 1H), 2.55 (quint,  $J = 7.5$  Hz, 2H), 2.25 (quint,  $J = 7.5$  Hz, 2H), 1.10 (t,  $J = 7.5$  Hz, 3H), 1.02 (t,  $J = 7.5$  Hz, 3H);  $^{13}\text{C}$  NMR ( $\text{CDCl}_3$ , 125 MHz, ppm):  $\delta$  143.1, 140.9, 130.0, 128.1, 126.4, 126.3, 22.9, 21.7, 14.5, 13.7; HRMS calc. for  $\text{C}_{12}\text{H}_{17}$  ( $\text{M}+\text{H}$ ) $^+$ , 161.13248; found, 161.13263.

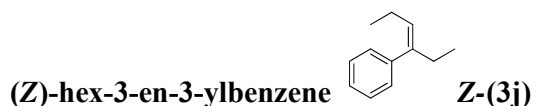

Colorless oil;  $^1\text{H}$  NMR ( $\text{CDCl}_3$ , 500 MHz, ppm):  $\delta$  7.35 (t,  $J = 7.4$  Hz, 2H), 7.26 (tt,  $J_1 = 1.3$  Hz,  $J_2 = 7.5$  Hz, 1H), 7.18-7.16 (m, 2H), 5.45 (t,  $J = 7.4$  Hz, 1H), 2.36 (q,  $J = 7.5$  Hz, 2H), 1.96 (quint,  $J = 7.5$  Hz, 2H), 0.99 (t,  $J = 7.5$  Hz, 3H), 0.95 (t,  $J = 7.5$  Hz, 3H);  $^{13}\text{C}$  NMR ( $\text{CDCl}_3$ , 125 MHz, ppm):  $\delta$  142.0, 141.6, 128.4, 127.9, 127.7, 126.3, 32.0, 22.2, 14.8, 13.1; HRMS calc. for  $\text{C}_{12}\text{H}_{17}$  ( $\text{M}+\text{H}$ ) $^+$ , 161.13248; found, 161.13280.

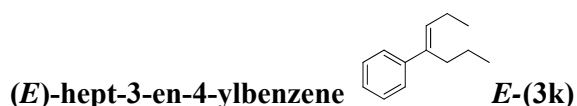

Colorless oil;  $^1\text{H}$  NMR ( $\text{CDCl}_3$ , 500 MHz, ppm):  $\delta$  7.39-7.37 (m, 2H), 7.34-7.31 (m, 2H), 7.24 (tt,  $J_1 = 1.3$  Hz,  $J_2 = 7.2$  Hz, 1H), 5.69 (t,  $J = 7.2$  Hz, 1H), 2.51 (t,  $J = 7.5$  Hz, 2H), 2.25 (quint,  $J = 7.5$  Hz, 2H), 1.44-1.37 (m, 2H), 1.09 (t,  $J = 7.5$  Hz, 3H), 0.92 (t,  $J = 7.4$  Hz, 3H);  $^{13}\text{C}$  NMR ( $\text{CDCl}_3$ , 125 MHz, ppm):  $\delta$  143.4, 139.4, 130.9, 128.1, 126.4, 126.3, 31.6, 21.9, 21.8, 14.5, 13.9; HRMS calc. for  $\text{C}_{13}\text{H}_{19}$  ( $\text{M}+\text{H}$ ) $^+$ , 175.14813; found, 175.14864.

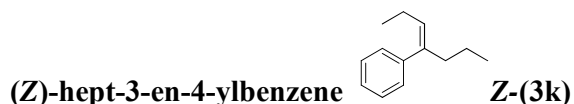

Colorless oil;  $^1\text{H}$  NMR ( $\text{CDCl}_3$ , 500 MHz, ppm):  $\delta$  7.36-7.32 (m, 2H), 7.25 (tt,  $J_1 = 1.3$  Hz,  $J_2 = 7.4$  Hz, 1H), 7.17-7.15 (m, 2H), 5.45 (t,  $J = 7.4$  Hz, 1H), 2.32 (t,  $J = 7.5$  Hz, 2H), 1.96 (quint,  $J = 7.5$  Hz, 2H), 1.37-1.31 (m, 2H), 0.95 (t,  $J = 7.5$  Hz, 3H), 0.89 (t,  $J = 7.4$  Hz, 3H);  $^{13}\text{C}$  NMR ( $\text{CDCl}_3$ , 125 MHz, ppm):  $\delta$  141.5, 140.2, 129.1, 128.4, 127.9, 126.2, 41.3, 22.2, 21.2, 14.8, 13.6; HRMS calc. for  $\text{C}_{13}\text{H}_{19}$  ( $\text{M}+\text{H}$ ) $^+$ , 175.14813; found, 175.14834.

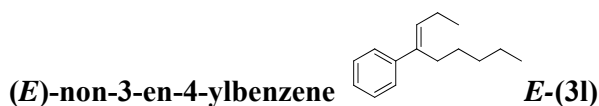

Colorless oil;  $^1\text{H}$  NMR ( $\text{CDCl}_3$ , 500 MHz, ppm):  $\delta$  7.38-7.36 (m, 2H), 7.34-7.30 (m, 2H), 7.24 (tt,  $J_1 = 1.3$  Hz,  $J_2 = 7.2$  Hz, 1H), 5.67 (t,  $J = 7.2$  Hz, 1H), 2.51 (t,  $J = 7.2$  Hz, 2H), 2.24 (quint,  $J = 7.5$  Hz, 2H), 1.39-1.34 (m, 2H), 1.31-1.29 (m, 4H), 1.08 (t,  $J = 7.5$  Hz, 3H), 0.88 (t,  $J = 7.0$  Hz, 3H);  $^{13}\text{C}$  NMR ( $\text{CDCl}_3$ , 125 MHz, ppm):  $\delta$  143.4, 139.6, 130.6, 128.1, 126.4, 126.3, 31.8, 29.7, 28.5, 22.5, 21.9, 14.5, 14.1; HRMS calc. for  $\text{C}_{15}\text{H}_{23}$  ( $\text{M}+\text{H}$ ) $^+$ , 203.17943; found, 203.17949.

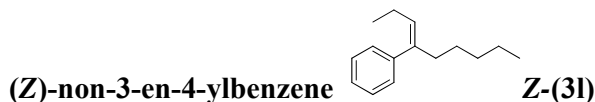

Colorless oil;  $^1\text{H}$  NMR ( $\text{CDCl}_3$ , 500 MHz, ppm):  $\delta$  7.36-7.33 (m, 2H), 7.26 (tt,  $J_1 = 1.3$  Hz,  $J_2 = 7.4$  Hz, 1H), 7.17-7.16 (m, 2H), 5.45 (t,  $J = 7.4$  Hz, 1H), 2.34 (t,  $J = 7.4$  Hz, 2H), 1.96 (quint,  $J = 7.5$  Hz, 2H), 1.34-1.31 (m, 2H), 1.29-1.27 (m, 4H), 0.95 (t,  $J = 7.5$  Hz, 3H), 0.88 (t,  $J = 7.0$  Hz, 3H);  $^{13}\text{C}$  NMR ( $\text{CDCl}_3$ , 125 MHz, ppm):  $\delta$  141.6, 140.5, 128.8, 128.4, 127.9, 126.2, 39.2, 31.4, 27.9, 22.5, 22.2, 14.8, 14.1; HRMS calc. for  $\text{C}_{15}\text{H}_{23}$  ( $\text{M}+\text{H}$ ) $^+$ , 203.17943; found, 203.17951.

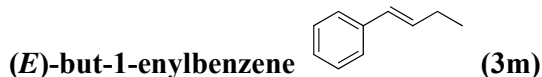

Colorless oil; The spectroscopic data correspond to those previously reported in the literature.<sup>[4]</sup>  $^1\text{H}$  NMR ( $\text{CDCl}_3$ , 500 MHz, ppm):  $\delta$  7.38-7.36 (m, 2H), 7.31 (t,  $J = 7.5$  Hz, 2H), 7.21 (t,  $J = 7.3$  Hz, 1H), 6.41(d,  $J = 15.9$  Hz, 1H), 6.31 (dt,  $J_1 = 6.4$  Hz,  $J_2 = 15.9$  Hz, 1H), 2.26 (quint,  $J = 7.5$  Hz, 2H), 1.12 (t,  $J = 7.5$  Hz, 3H);  $^{13}\text{C}$  NMR ( $\text{CDCl}_3$ , 125 MHz, ppm):  $\delta$  137.9, 132.7, 128.8, 128.5, 126.7, 125.9, 26.1, 13.7; MS (EI)  $m/z$ : 132.1, 117.1, 91.1.

**(5S,8R,9S,10S,13R,14S,17R)-10,13-dimethyl-17-((R)-6-methylheptan-2-yl)-3-propylidenehexadecahydro-1H-cyclopenta[a]phenanthrene**

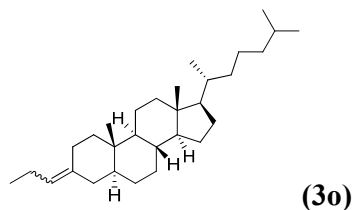

Colorless oil;  $^1\text{H}$  NMR ( $\text{CDCl}_3$ , 500 MHz, ppm):  $\delta$  5.08 (t,  $J = 7.0$  Hz, 1H), 2.22-2.16 (m, 1H), 2.03-1.96 (m, 4H), 1.87-1.65 (m, 5H), 1.59-1.49 (m, 3H), 1.38-1.24 (m, 9H), 1.17-0.98 (m, 10H), 0.95 (t,  $J = 7.5$  Hz, 3H), 0.92 (d,  $J = 6.5$  Hz, 3H), 0.91-0.88 (m, 10H), 0.68 (s, 3H);  $^{13}\text{C}$  NMR ( $\text{CDCl}_3$ , 125 MHz, ppm):  $\delta$  138.8, 138.7, 122.9, 122.7, 56.6, 56.3, 54.53, 54.49, 48.4, 47.6, 42.62, 42.61, 40.13, 40.11, 39.54, 39.50, 39.46, 36.53, 36.49, 36.2, 35.8, 35.5, 32.5, 32.1, 32.0, 31.2, 29.2, 28.9, 28.3, 28.0, 24.2, 24.1, 23.8, 22.8, 22.6, 21.1, 21.0, 20.3, 18.7, 14.90, 14.87, 12.1, 11.82, 11.80; HRMS calc. for  $\text{C}_{30}\text{H}_{53}$  ( $\text{M}+\text{H}$ ) $^+$ , 413.41418; found, 413.41460.

**(2-methylhex-3-en-3-yl)benzene** 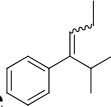 **Z/E-(3p)**

Colorless oil;  $^1\text{H}$  NMR ( $\text{CDCl}_3$ , 500 MHz, ppm):  $\delta$  7.36-7.32 (m, 2H), 7.30-7.23 (m, 3.5H), 7.20-7.18 (m, 1.5H), 7.11-7.09 (m, 2H), 5.42 (t,  $J_1 = 1.2$  Hz,  $J_2 = 7.3$  Hz, 1H), 5.28 (t,  $J = 7.3$  Hz, 0.75H), 3.10-3.02 (m, 0.75H), 2.58-2.53 (m, 1H), 2.23 (quint,  $J = 7.4$  Hz, 1.5H), 1.84 (quint,  $J = 7.2$  Hz, 2H), 1.08-1.05 (m, 6.75H), 1.02 (d,  $J = 6.8$  Hz, 6H), 0.91 (d,  $J = 7.5$  Hz, 3H);  $^{13}\text{C}$  NMR ( $\text{CDCl}_3$ , 125 MHz, ppm):  $\delta$  146.7, 146.2, 143.5, 141.5, 130.7, 128.9, 128.6, 127.7, 127.4, 126.3, 126.1, 126.0, 35.7, 29.2, 22.1, 21.9, 21.8, 21.0, 14.7, 14.6; HRMS calc. for  $\text{C}_{13}\text{H}_{19}$  ( $\text{M}+\text{H}$ ) $^+$ , 175.14813; found, 175.14786.

**propylidenecyclohexane**  **(3q)**

Colorless oil;  $^1\text{H}$  NMR ( $\text{CDCl}_3$ , 500 MHz, ppm):  $\delta$  5.09 (t,  $J = 7.2$  Hz, 1H), 2.14 (t,  $J = 6.2$  Hz, 2H), 2.08 (t,  $J = 6.0$  Hz, 2H), 2.01 (quint,  $J = 7.5$  Hz, 2H), 1.57-1.50 (m, 6H), 0.95 (t,  $J = 7.5$  Hz, 3H);  $^{13}\text{C}$  NMR ( $\text{CDCl}_3$ , 125 MHz, ppm):  $\delta$  139.0, 123.1, 37.1, 28.7, 28.6, 27.9, 27.0, 20.3, 14.9; HRMS calc. for  $\text{C}_9\text{H}_{17}$  ( $\text{M}+\text{H}$ ) $^+$ , 125.13248; found, 125.13276.

**(4-propylidenecyclohexyl)benzene** 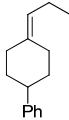 **(3r)**

Colorless oil;  $^1\text{H}$  NMR ( $\text{CDCl}_3$ , 500 MHz, ppm):  $\delta$  7.32 (t,  $J = 8.0$  Hz, 2H), 7.25-7.19 (m, 3H), 5.19 (t,  $J = 7.3$  Hz, 1H), 2.78-2.68 (m, 2H), 2.34-2.29 (m, 1H), 2.25-2.19 (m, 1H), 2.10-2.03 (m, 2H), 2.02-1.96 (m, 2H), 1.93-1.86 (m, 1H), 1.59-1.43 (m, 2H), 1.00 (t,  $J = 7.5$  Hz, 3H);  $^{13}\text{C}$  NMR ( $\text{CDCl}_3$ , 125 MHz, ppm):  $\delta$  147.2, 137.6, 128.3, 126.9, 125.9, 124.0, 44.9, 36.8, 35.9, 35.2, 28.3, 20.5, 14.9; HRMS calc. for  $\text{C}_{15}\text{H}_{21}$  ( $\text{M}+\text{H}$ ) $^+$ , 201.16378; found, 201.16400.

**prop-1-ene-1,1-diyl dibenzene**  **(4a)**

White solid, mp. 50-50.8°C, The spectroscopic data correspond to those previously reported in the literature.<sup>[5]</sup>  $^1\text{H}$  NMR ( $\text{CDCl}_3$ , 500 MHz, ppm):  $\delta$  7.42 (t,  $J = 7.2$  Hz, 2H), 7.34 (t,  $J = 7.4$  Hz, 1H), 7.31-7.22 (m, 7H), 6.22 (q,  $J = 7.0$  Hz, 1H), 1.80 (d,  $J = 7.0$  Hz, 3H);  $^{13}\text{C}$  NMR ( $\text{CDCl}_3$ , 125 MHz, ppm):  $\delta$  143.0, 142.4, 140.0, 130.1, 128.2, 128.1, 127.2, 126.8, 126.7, 124.2, 15.7; MS (EI)  $m/z$ : 194.1, 178.1, 165.1, 115.0.

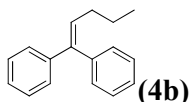

**pent-1-ene-1,1-diyl dibenzene**

**(4b)**

Colorless oil; The spectroscopic data correspond to those previously reported in the literature.<sup>[6]</sup> <sup>1</sup>H NMR (CDCl<sub>3</sub>, 500 MHz, ppm):  $\delta$  7.41 (t,  $J = 7.1$  Hz, 2H), 7.35 (tt,  $J_1 = 1.4$  Hz,  $J_2 = 7.4$  Hz, 1H), 7.31-7.22 (m, 7H), 6.14 (t,  $J = 7.5$  Hz, 1H), 2.14 (q,  $J = 7.5$  Hz, 2H), 1.55-1.48 (m, 2H), 0.95 (t,  $J = 7.5$  Hz, 3H); <sup>13</sup>C NMR (CDCl<sub>3</sub>, 125 MHz, ppm):  $\delta$  142.9, 141.6, 140.4, 130.1, 130.0, 128.1, 128.0, 127.2, 126.8, 126.7, 31.9, 23.2, 13.9; MS (EI)  $m/z$ : 222.2, 193.2, 165.2, 115.2, 91.2.

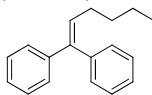

**hex-1-ene-1,1-diyl dibenzene**

**(4c)**

Colorless oil; The spectroscopic data correspond to those previously reported in the literature.<sup>[7]</sup> <sup>1</sup>H NMR (CDCl<sub>3</sub>, 500 MHz, ppm):  $\delta$  7.42 (tt,  $J_1 = 1.1$  Hz,  $J_2 = 7.1$  Hz, 2H), 7.34 (tt,  $J_1 = 2.7$  Hz,  $J_2 = 7.4$  Hz, 1H), 7.31-7.21 (m, 7H), 6.13 (t,  $J = 7.5$  Hz, 1H), 2.15 (q,  $J = 7.5$  Hz, 2H), 1.49-1.43 (m, 2H), 1.39-1.32 (m, 2H), 0.90 (t,  $J = 7.4$  Hz, 3H); <sup>13</sup>C NMR (CDCl<sub>3</sub>, 125 MHz, ppm):  $\delta$  142.9, 141.4, 140.4, 130.3, 130.0, 128.1, 128.0, 127.2, 126.8, 126.7, 32.2, 29.5, 22.4, 14.0; MS (EI)  $m/z$ : 236.2, 193.2, 178.2, 165.1, 115.1.

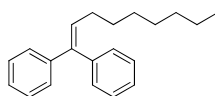

**non-1-ene-1,1-diyl dibenzene**

**(4d)**

Colorless oil; The spectroscopic data correspond to those previously reported in the literature.<sup>[8]</sup> <sup>1</sup>H NMR (CDCl<sub>3</sub>, 500 MHz, ppm):  $\delta$  7.40 (t,  $J = 7.2$  Hz, 2H), 7.34 (t,  $J = 7.5$  Hz, 1H), 7.31-7.21 (m, 7H), 6.12 (t,  $J = 7.5$  Hz, 1H), 2.15 (q,  $J = 7.5$  Hz, 2H), 1.50-1.44 (m, 2H), 1.33-1.28 (m, 8H), 0.91 (t,  $J = 7.4$  Hz, 3H); <sup>13</sup>C NMR (CDCl<sub>3</sub>, 125 MHz, ppm):  $\delta$  142.9, 141.4, 140.4, 130.4, 130.0, 128.1, 128.0, 127.2, 126.8, 126.7, 31.8, 30.0, 29.8, 29.3, 29.2, 22.7, 14.1; MS (EI)  $m/z$ : 278.1, 193.1, 165.1, 115.1.

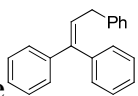

**prop-1-ene-1,1,3-triyl tribenzene**

**(4e)**

Colorless oil; The spectroscopic data correspond to those previously reported in the literature.<sup>[9]</sup> <sup>1</sup>H NMR (CDCl<sub>3</sub>, 500 MHz, ppm):  $\delta$  7.43 (t,  $J = 7.1$  Hz, 2H), 7.38-7.32 (m, 3H), 7.31-7.28 (m, 6H), 7.27-7.22 (m, 4H), 6.32 (t,  $J = 7.6$  Hz, 1H), 3.52 (d,  $J = 7.6$  Hz, 1H); <sup>13</sup>C NMR (CDCl<sub>3</sub>, 125 MHz, ppm):  $\delta$  142.5, 142.4, 141.0, 139.8, 129.9, 128.5, 128.4, 128.3, 128.1, 127.8, 127.4, 127.2, 127.1, 126.0, 35.9; MS (EI)  $m/z$ : 270.1, 255.2, 192.1, 178.1, 115.1.

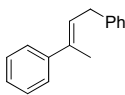

**(E)-but-2-ene-1,3-diyl dibenzene**

**E-(4f)**

Colorless oil; <sup>1</sup>H NMR (CDCl<sub>3</sub>, 500 MHz, ppm):  $\delta$  7.46-7.44 (m, 2H), 7.36-7.32 (m, 4H), 7.29-7.23 (m, 4H), 6.01 (tq,  $J_1 = 1.3$  Hz,  $J_2 = 7.4$  Hz, 1H), 3.61 (d,  $J = 7.4$  Hz, 2H), 2.19 (d,  $J = 0.8$  Hz, 3H); <sup>13</sup>C NMR (CDCl<sub>3</sub>, 125 MHz, ppm):  $\delta$  143.6, 141.0, 135.7, 128.5, 128.4, 128.2, 126.8, 126.7, 125.9, 125.7, 35.0, 16.0; HRMS calc. for

C<sub>16</sub>H<sub>16</sub> (M)<sup>+</sup>, 208.12465; found, 208.12451.

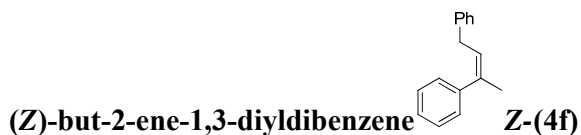

Colorless oil; <sup>1</sup>H NMR (CDCl<sub>3</sub>, 500 MHz, ppm): δ 7.38 (t, *J* = 7.4 Hz, 2H), 7.32-7.27 (m, 5H), 7.22-7.18 (m, 3H), 5.69 (td, *J*<sub>1</sub> = 1.4 Hz, *J*<sub>2</sub> = 7.5 Hz, 1H), 3.36 (d, *J* = 7.5 Hz, 2H), 2.11 (d, *J* = 1.3 Hz, 3H); <sup>13</sup>C NMR (CDCl<sub>3</sub>, 125 MHz, ppm): δ 141.8, 141.5, 137.4, 128.4, 128.3, 128.2, 127.9, 126.7, 125.8, 125.7, 35.3, 25.7; HRMS calc. for C<sub>16</sub>H<sub>16</sub> (M)<sup>+</sup>, 208.12465; found, 208.12390.

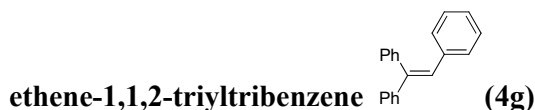

Colorless oil; The spectroscopic data correspond to those previously reported in the literature.<sup>[10]</sup> <sup>1</sup>H NMR (CDCl<sub>3</sub>, 500 MHz, ppm): δ 7.38-7.31 (m, 8H), 7.26-7.23 (m, 2H), 7.18-7.13 (m, 3H), 7.07-7.06 (m, 2H), 7.00 (s, 1H); <sup>13</sup>C NMR (CDCl<sub>3</sub>, 125 MHz, ppm): δ 143.4, 142.6, 140.4, 137.4, 130.4, 129.6, 128.6, 128.2, 128.1, 127.9, 127.6, 127.5, 127.4, 126.8; MS (EI) *m/z*: 256.1, 239.1, 178.1, 165.1.

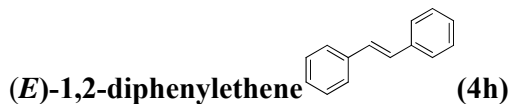

White solid; mp. 124.6-126.1°C. The spectroscopic data correspond to those previously reported in the literature.<sup>[11]</sup> <sup>1</sup>H NMR (CDCl<sub>3</sub>, 500 MHz, ppm): δ 7.56 (d, *J* = 7.7 Hz, 4H), 7.40 (t, *J* = 7.6 Hz, 4H), 7.30 (t, *J* = 7.4 Hz, 2H), 7.16 (s, 2H); <sup>13</sup>C NMR (CDCl<sub>3</sub>, 125 MHz, ppm): δ 137.3, 128.7, 127.6, 126.5; MS (EI) *m/z*: 236.2, 193.2, 178.2, 165.1, 115.1.

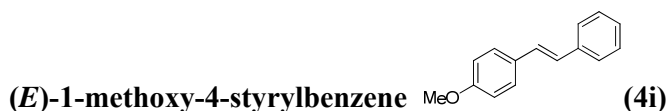

White solid, mp 108.4-108.6°C; The spectroscopic data correspond to those previously reported in the literature.<sup>[11a]</sup> <sup>1</sup>H NMR (CDCl<sub>3</sub>, 500 MHz, ppm): δ 7.52 (d, *J* = 7.6 Hz, 2H), 7.49 (d, *J* = 8.7 Hz, 2H), 7.38 (t, *J* = 7.6 Hz, 2H), 7.27 (t, *J* = 7.4 Hz, 1H), 7.10 (d, *J* = 16.3 Hz, 1H), 7.01 (d, *J* = 16.3 Hz, 1H), 6.93 (d, *J* = 8.7 Hz, 2H), 3.86 (s, 3H); <sup>13</sup>C NMR (CDCl<sub>3</sub>, 125 MHz, ppm): δ 159.3, 137.7, 130.2, 128.7, 128.2, 127.7, 127.2, 126.6, 126.3, 114.1, 55.3; MS (EI) *m/z*: 210.1, 165.1, 152.1, 104.1.

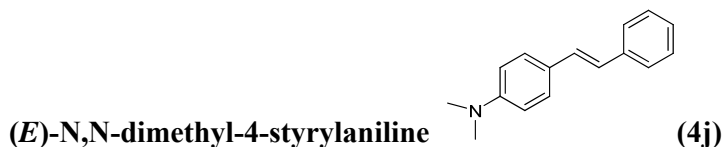

White solid, mp 144.2-145.6°C. The spectroscopic data correspond to those previously reported in the literature.<sup>[13]</sup> <sup>1</sup>H NMR (CDCl<sub>3</sub>, 500 MHz, ppm): δ 7.51 (d, *J* = 6.9 Hz, 2H), 7.45 (d, *J* = 8.8 Hz, 2H), 7.36 (t, *J* = 7.6 Hz, 2H), 7.23 (t, *J* = 7.3 Hz, 1H), 7.09 (d, *J* = 16.4 Hz, 1H), 6.95 (d, *J* = 16.4 Hz, 1H), 6.76 (d, *J* = 8.8 Hz, 2H), 3.02 (s, 6H); <sup>13</sup>C NMR (CDCl<sub>3</sub>, 125 MHz, ppm): δ 150.1, 138.2, 128.8, 128.6, 127.6,

126.7, 126.0, 125.8, 124.4, 112.5, 40.5; MS (EI) m/z: 223.1, 165.1, 114.1.

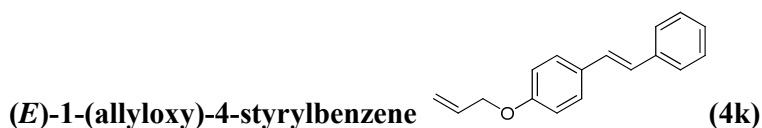

White solid, mp 124.4-126.2°C. The spectroscopic data correspond to those previously reported in the literature<sup>[14]</sup>. <sup>1</sup>H NMR (CDCl<sub>3</sub>, 500 MHz, ppm): δ 7.52 (d, *J* = 6.9 Hz, 2H), 7.48 (d, *J* = 8.7 Hz, 2H), 7.37 (t, *J* = 7.7 Hz, 2H), 7.26 (t, *J* = 7.3 Hz, 1H), 7.08 (d, *J* = 16.3 Hz, 1H), 7.01 (d, *J* = 16.3 Hz, 1H), 6.94 (d, *J* = 8.8 Hz, 2H), 6.13-6.06 (m, 1H), 5.47(dq, *J*<sub>1</sub> = 1.6 Hz, *J*<sub>2</sub> = 17.3 Hz, 1H), 5.33(dq, *J*<sub>1</sub> = 1.5 Hz, *J*<sub>2</sub> = 10.4 Hz, 1H), 4.59(dt, *J*<sub>1</sub> = 1.6 Hz, *J*<sub>2</sub> = 5.3 Hz, 1H); <sup>13</sup>C NMR (CDCl<sub>3</sub>, 125 MHz, ppm): δ 158.3, 137.6, 133.2, 130.3, 128.6, 128.2, 127.7, 127.2, 126.7, 126.3, 117.8, 115.0, 68.9; MS (EI) m/z: 236.1, 195.1, 165.1, 115.1

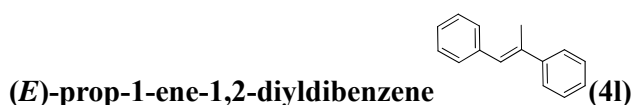

White solid, mp. 78.2-80.5; The spectroscopic data correspond to those previously reported in the literature.<sup>[16]</sup> <sup>1</sup>H NMR (CDCl<sub>3</sub>, 500 MHz, ppm): δ 7.58-7.56 (m, 2H), 7.43-7.40 (m, 6H), 7.35-7.32 (m, 1H), 7.29-7.27(m, 1H), 6.88 (d, *J* = 1.1 Hz, 1H), 2.33 (d, *J* = 1.4 Hz, 3H); <sup>13</sup>C NMR (CDCl<sub>3</sub>, 125 MHz, ppm): δ 144.0, 138.4, 137.4, 129.2, 128.4, 128.2, 127.7, 127.2, 126.5, 126.0, 17.5; MS (EI) m/z: 194.1, 179.1, 165.1, 115.0.

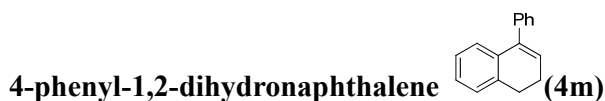

Colorless oil; The spectroscopic data correspond to those previously reported in the literature<sup>[17]</sup>. <sup>1</sup>H NMR (CDCl<sub>3</sub>, 500 MHz, ppm): δ 7.44-7.35 (m, 5H), 7.24 (d, *J* = 7.3 Hz, 1H), 7.20 (t, *J* = 7.3 Hz, 1H), 7.15 (t, *J* = 7.6 Hz, 1H), 7.05 (d, *J* = 7.6 Hz, 1H), 6.13 (t, *J* = 4.7 Hz, 1H), 2.90 (t, *J* = 7.9 Hz, 2H), 2.47-2.43 (m, 2H); <sup>13</sup>C NMR (CDCl<sub>3</sub>, 125 MHz, ppm): δ 140.8, 139.9, 136.8, 135.1, 128.8, 128.2, 127.7, 127.6, 127.1, 127.0, 126.2, 125.4, 28.3, 23.6; MS (EI) m/z: 206.1, 191.1, 178.1, 152.0, 128.1.

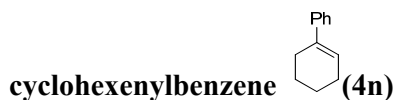

Colorless oil; The spectroscopic data correspond to those previously reported in the literature<sup>[6]</sup>. <sup>1</sup>H NMR (CDCl<sub>3</sub>, 500 MHz, ppm): δ 7.42-7.40 (m, 2H), 7.33 (t, *J* = 7.4 Hz, 2H), 7.24 (tt, *J*<sub>1</sub> = 1.2 Hz, *J*<sub>2</sub> = 7.4 Hz, 1H), 6.16-6.14 (m, 1H), 2.46-2.43 (m, 2H), 2.26-2.22 (m, 2H), 1.84-1.79 (m, 2H), 1.72-1.67 (m, 2H); <sup>13</sup>C NMR (CDCl<sub>3</sub>, 125 MHz, ppm): δ 142.7, 136.6, 128.2, 126.5, 124.9, 124.8, 27.4, 25.9, 23.1, 22.2; MS (EI) m/z: 158.1, 143.1, 129.1, 115.1.

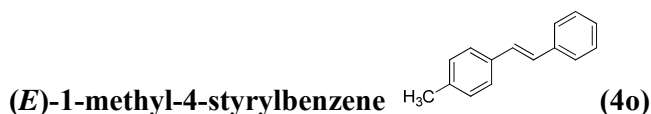

White solid; mp 119.4-121.3°C. The spectroscopic data correspond to those previously reported in the literature.<sup>[11]</sup> <sup>1</sup>H NMR (CDCl<sub>3</sub>, 500 MHz, ppm): δ 7.54 (d, *J* = 8.0 Hz, 2H), 7.45 (d, *J* = 8.0 Hz, 2H), 7.38 (d, *J* = 7.5 Hz, 2H), 7.30-7.26 (m, 1H), 7.20 (d, *J* = 7.9 Hz, 2H), 7.11 (d, *J* = 3.8 Hz, 2H), 2.40 (s, 3H); <sup>13</sup>C NMR (CDCl<sub>3</sub>, 125 MHz, ppm): δ 137.5, 134.6, 129.4, 128.7, 128.6, 127.7, 127.4, 126.4, 126.4, 21.3; MS (EI) *m/z*: 194.1, 179.1, 165.1, 152.1, 115.1.

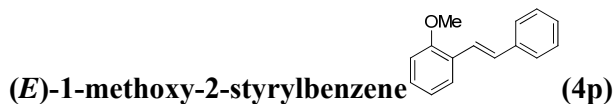

White solid, mp 59.1-59.7°C. The spectroscopic data correspond to those previously reported in the literature.<sup>[12]</sup> <sup>1</sup>H NMR (CDCl<sub>3</sub>, 500 MHz, ppm): δ 7.63 (dd, *J*<sub>1</sub> = 1.6 Hz, *J*<sub>2</sub> = 7.7 Hz, 1H), 7.57 (d, *J* = 7.4 Hz, 2H), 7.52 (d, *J* = 16.5 Hz, 1H), 7.38 (t, *J* = 7.5 Hz, 2H), 7.30-7.26 (m, 2H), 7.15 (d, *J* = 16.5 Hz, 1H), 7.00 (t, *J* = 7.4 Hz, 1H), 6.94 (d, *J* = 8.3 Hz, 1H), 3.92 (s, 3H); <sup>13</sup>C NMR (CDCl<sub>3</sub>, 125 MHz, ppm): δ 156.9, 138.0, 129.1, 128.7, 128.6, 127.4, 126.6, 126.5, 126.4, 123.5, 120.8, 111.0, 55.5; MS (EI) *m/z*: 210.1, 165.1, 152.1, 104.1.

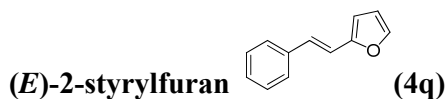

White solid, mp. 51.4-53.2°C; The spectroscopic data correspond to those previously reported in the literature.<sup>[15]</sup> <sup>1</sup>H NMR (CDCl<sub>3</sub>, 500 MHz, ppm): δ 7.50 (d, *J* = 7.4 Hz, 2H), 7.43 (d, *J* = 1.8 Hz, 1H), 7.39-7.36 (m, 2H), 7.29-7.26 (m, 1H), 7.07 (d, *J* = 16.3 Hz, 1H), 6.93 (d, *J* = 16.3 Hz, 1H); 6.46 (dd, *J*<sub>1</sub> = 1.8, *J*<sub>2</sub> = 3.3 Hz, 1H), 6.38 (d, *J* = 3.3 Hz, 1H); <sup>13</sup>C NMR (CDCl<sub>3</sub>, 125 MHz, ppm): δ 153.3, 142.1, 137.0, 128.7, 127.6, 127.1, 126.3, 116.5, 111.6, 108.6; MS (EI) *m/z*: 170.1, 141.1, 115.1.

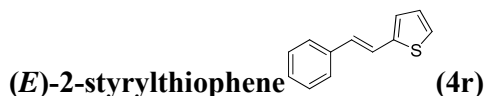

White solid, mp. 110.2-111.6°C; The spectroscopic data correspond to those previously reported in the literature.<sup>[11a]</sup> <sup>1</sup>H NMR (CDCl<sub>3</sub>, 500 MHz, ppm): δ 7.49 (d, *J* = 7.4 Hz, 2H), 7.37 (t, *J* = 7.5 Hz, 2H), 7.29-7.24 (m, 2H), 7.22 (d, *J* = 5.0 Hz, 1H), 7.10 (d, *J* = 3.1 Hz, 1H), 7.04-7.03 (m, 1H), 6.96 (d, *J* = 16.1 Hz, 1H); <sup>13</sup>C NMR (CDCl<sub>3</sub>, 125 MHz, ppm): δ 142.9, 137.0, 128.7, 128.3, 127.6, 126.3, 126.1, 124.3, 121.8; MS (EI) *m/z*: 186.1, 171.1, 152.1, 115.1.

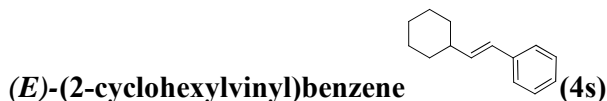

Colorless oil; The spectroscopic data correspond to those previously reported in the literature.<sup>[6]</sup> <sup>1</sup>H NMR (CDCl<sub>3</sub>, 500 MHz, ppm): δ 7.37 (d, *J* = 7.3 Hz, 2H), 7.31 (d, *J* = 7.5 Hz, 2H), 7.21 (tt, *J*<sub>1</sub> = 1.4 Hz, *J*<sub>2</sub> = 7.4 Hz, 1H), 6.36 (d, *J* = 16.0 Hz, 1H), 6.20 (dd, *J*<sub>1</sub> = 6.9 Hz, *J*<sub>2</sub> = 16.0 Hz, 1H), 2.19-2.12 (m, 1H), 1.85-1.77 (m, 4H), 1.73-1.69 (m, 1H), 1.39-1.30 (m, 2H), 1.27-1.17 (m, 3H); <sup>13</sup>C NMR (CDCl<sub>3</sub>, 125 MHz, ppm): δ 138.1, 136.9, 128.5, 127.2, 126.7, 125.9, 41.2, 33.0, 26.2, 26.1; MS (EI) *m/z*: 186.2, 171.2, 129.2, 104.2, 91.2.

## References

- [1] (a) C-F. Yao , C-M. Chu , J-T. Liu, *J. Org. Chem.*, **1998**, *63*, 719–722; (b) X. Zhao, J. Jing, K. Lu, Y. Zhang, J. Wang, *Chem. Commun.*, **2010**, *46*, 1724–1726.
- [2] J. Barluenga, P. Moriel, C. Valdés, F. Aznar, *Angew. Chem. Int. Ed.* **2007**, *46*, 5587-5590.
- [3] (a) A. B. Smith, III, A. T. Hoye, D. Martinez-Solorio, W.-S. Kim, R. Tong, *J. Am. Chem. Soc.* **2012**, *134*, 4533–4536; (b) N. Tsukada, T. Mitsuboshi, H. Setoguchi, Y. Inoue, *J. Am. Chem. Soc.* **2003**, *125*, 12102.
- [4] N. Sakai, T. Moriya, T. Konakahara, *J. Org. Chem.* **2007**, *72*, 5920-5922.
- [5] J. Li, Q. Liu, H. Shen, R. Huang, X. Zhang, Y. Xiong, C. Chen, *RSC Adv.*, **2015**, *5*, 85291.
- [6] S-W. Wu, J-L. Liu, F. Liu, *Org. Lett.* **2016**, *18*, 1–3.
- [7] (a) C. Ha, J. H. Horner, M. Newcomb, T. R. Varick, B. R. Arnold, J. Luszytk, *J. Org. Chem.* **1993**, *58*, 1194-1198; (b) H. Zeng, R. Hua, *J. Org. Chem.* **2008**, *73*, 558-562.
- [8] J. Terao, A. Ikumi, H. Kuniyasu, N. Kambe, *J. Am. Chem. Soc.*, **2003**, *125*, 5646–5647.
- [9] T. Miao, D. Xia, Y. Li, P. Lia, L. Wang, *Chem. Commun.*, **2016**, *52*, 3175–3178.
- [10] (a) F. Xue, J. Zhao, T. S. A. Hor, *Chem. Commun.*, **2013**, *49*, 10121; (b) J-Z. Zhang, Y. Tang, *Adv. Synth. Catal.* **2016**, *358*, 752-764.
- [11] (a) S. Fu, N-Y. Chen, X. Liu, Z. Shao, S-P. Luo, Q. Liu, *J. Am. Chem. Soc.*, **2016**, *138*, 8588-8594; (b) B. Shrestha, S. Thapa, S. K. Gurung, R. A. S. Pike, R. Giri, *J. Org. Chem.* **2016**, *81*, 787-802.
- [12] J. S. Foot, G. M. P. Giblin, A. C. Whitwooda, R. J. K. Taylor, *Org. Biomol. Chem.* **2005**, *3*, 756-763.
- [13] S. Keesara, S. Parvathaneni, M. R. Mandapati, *Tetrahedron Lett* **2014**, *55*, 6769–6772.
- [14] R. Martí-Centelles, R. Cejudo-Marín, E. Falomir, J. Murga, M. Carda, J. A. Marco, *Bioorg Med Chem*, **2013**, *21*, 3010–3015.
- [15] M. V. Sorokina, A. S. Pankova, M. A. Kuznetsov, *Asian J. Org. Chem.* **2016**, *5*, 389 -398.
- [16] S. Kindt, K. Wicht, M. R. Heinrich, *Angew. Chem. Int. Ed.* **2016**, *55*, 8744–8747.
- [17] D. Eom, S. Park, Y. Park, K. Lee, G. Hong, P. H. Lee, *Eur. J. Org. Chem.* **2013**, 2672-2682.



## 7. Copies of NMR Spectra for 3a-4s

### 3a

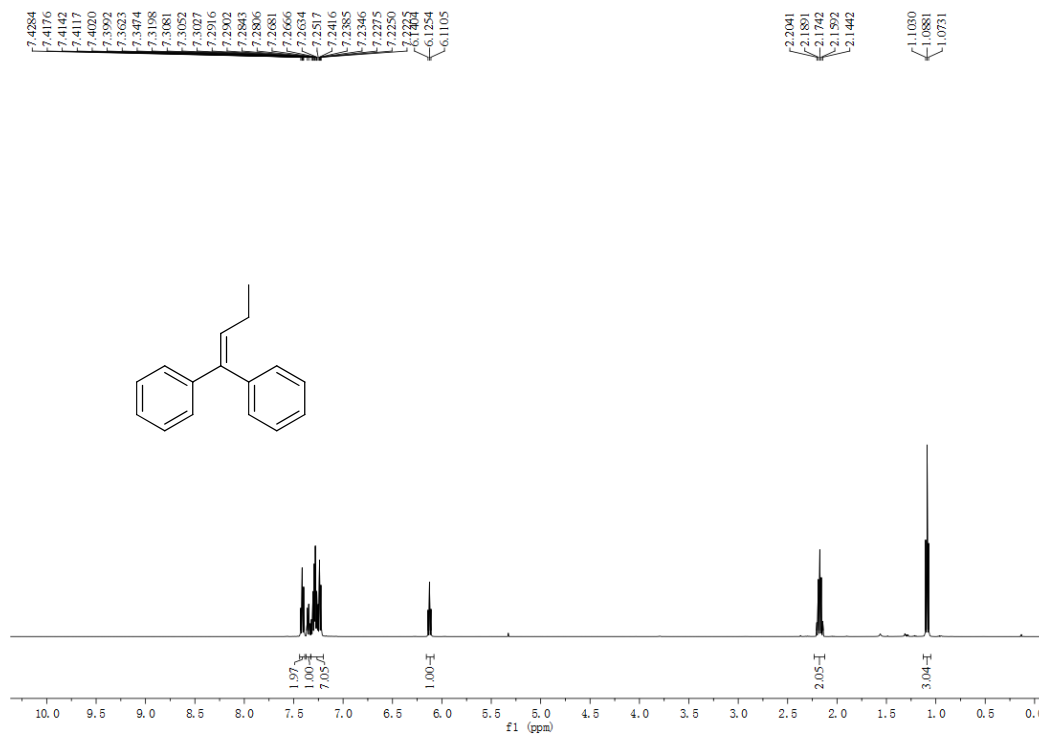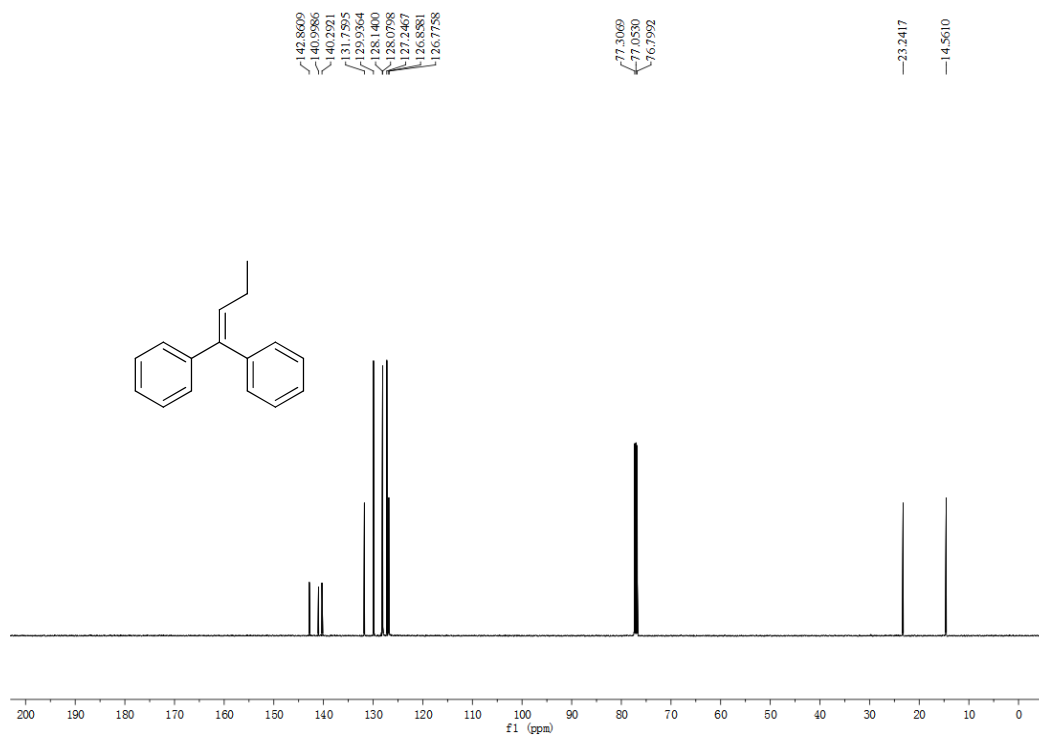

3b

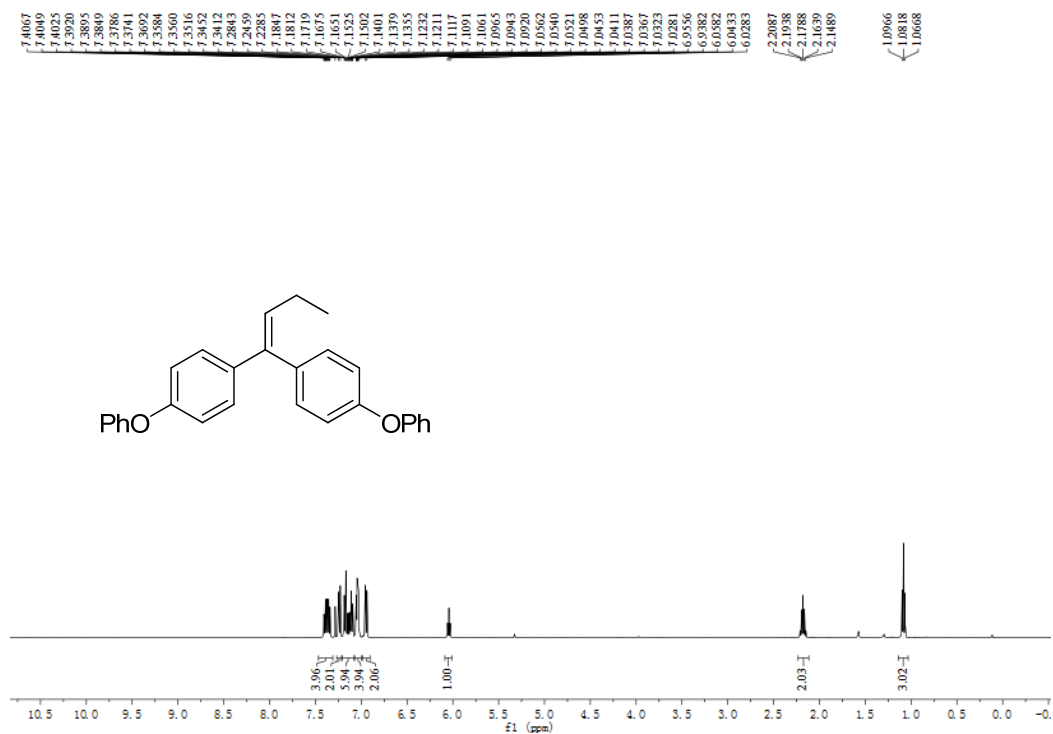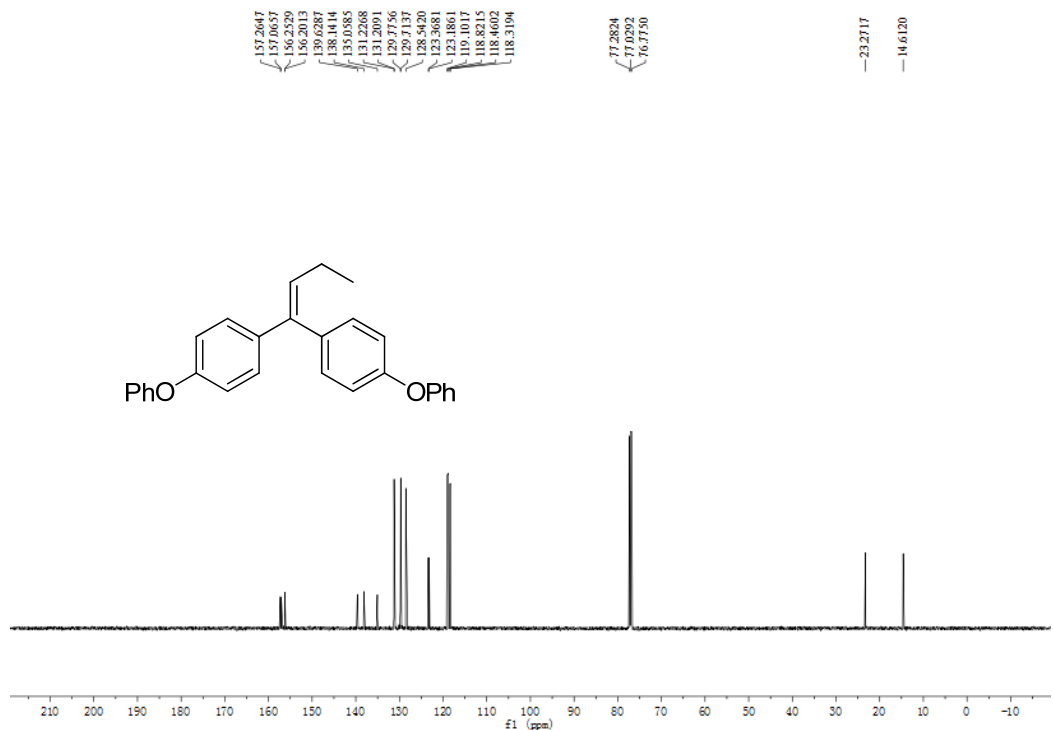

3c

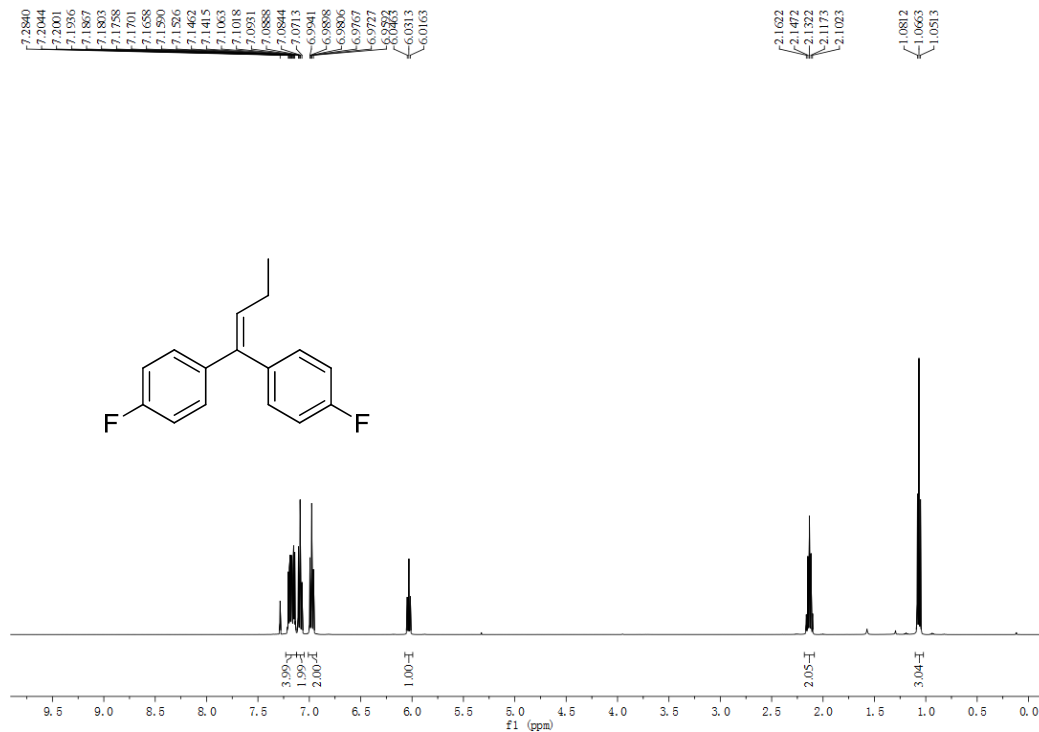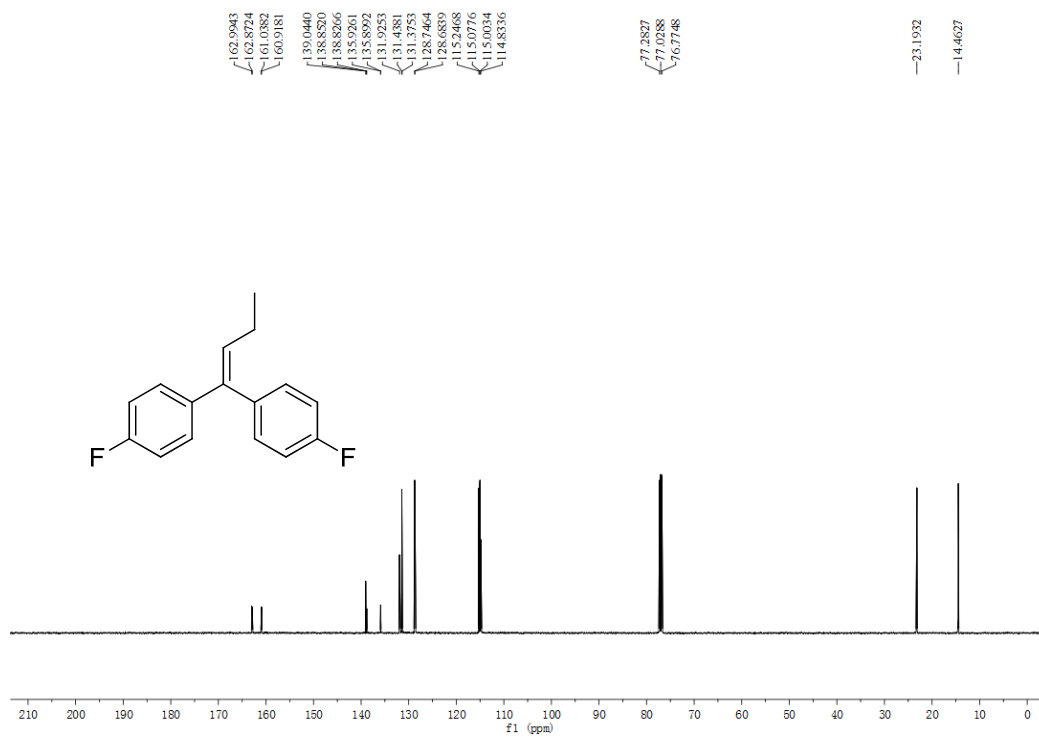

3d

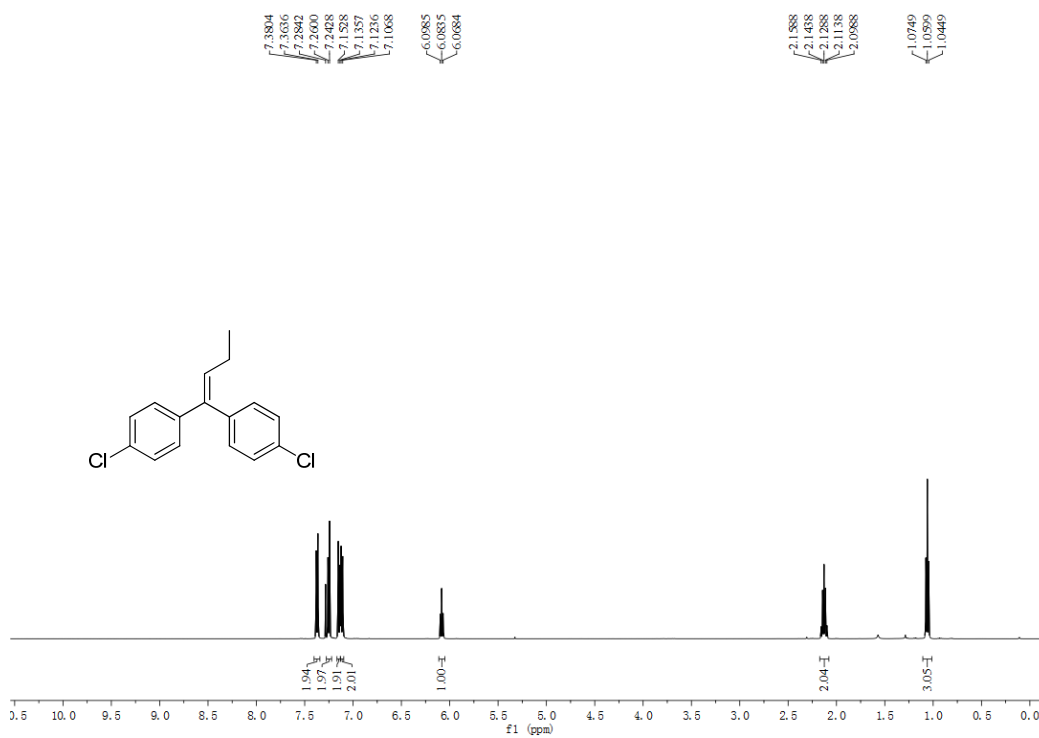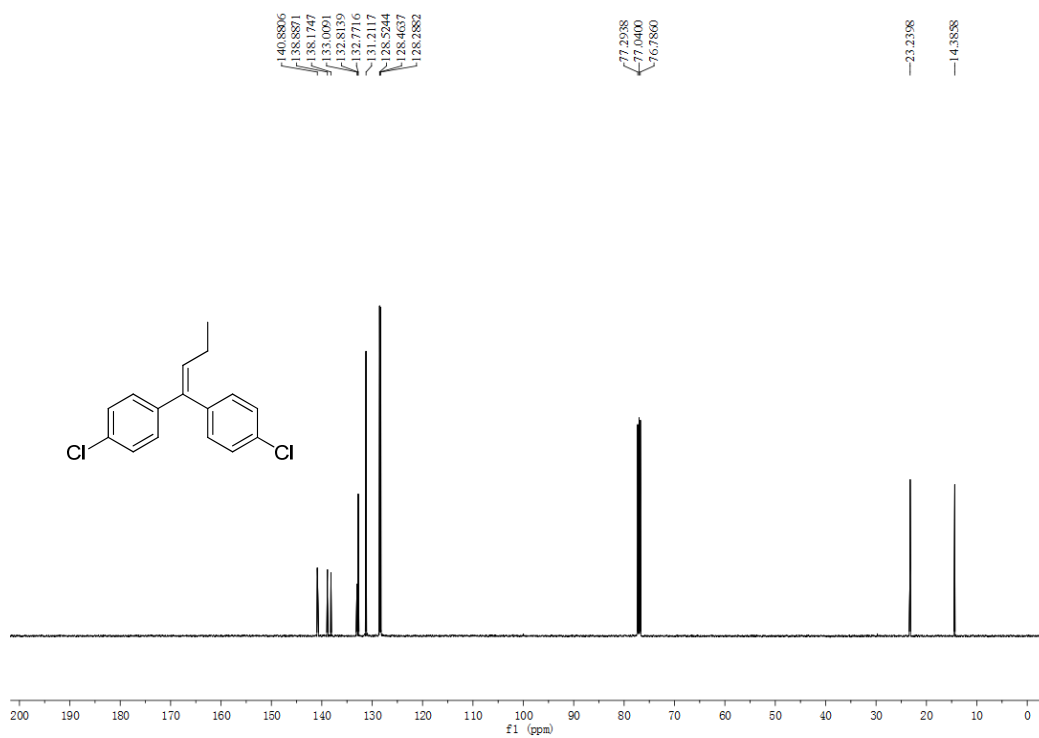

3e (Z/E)

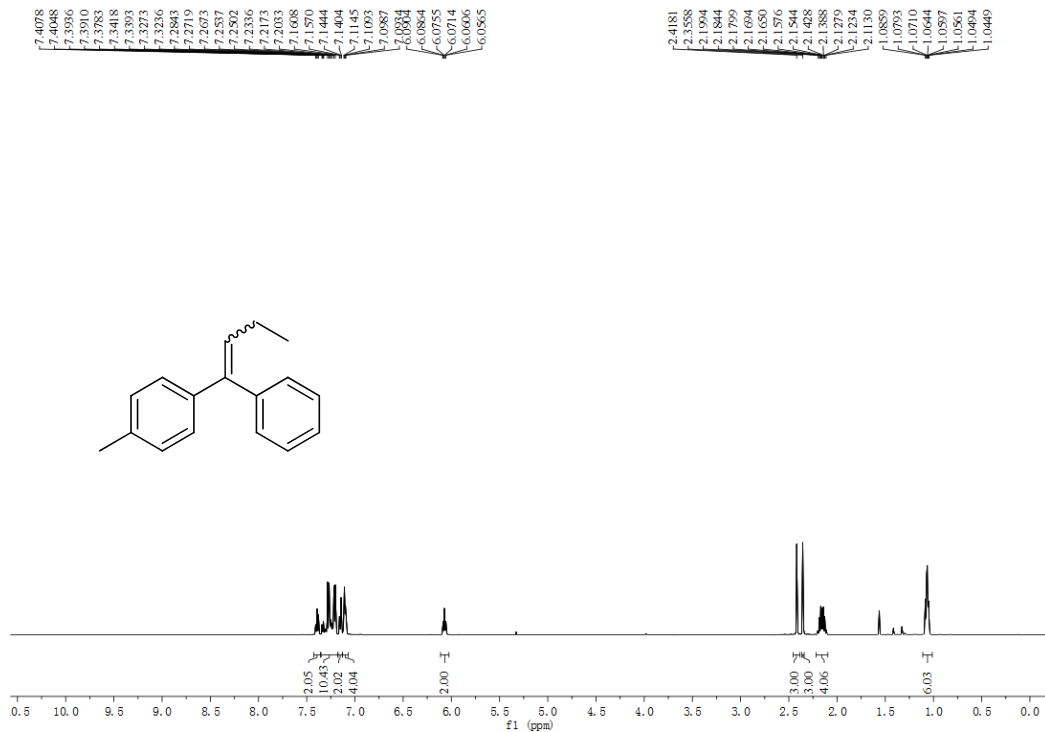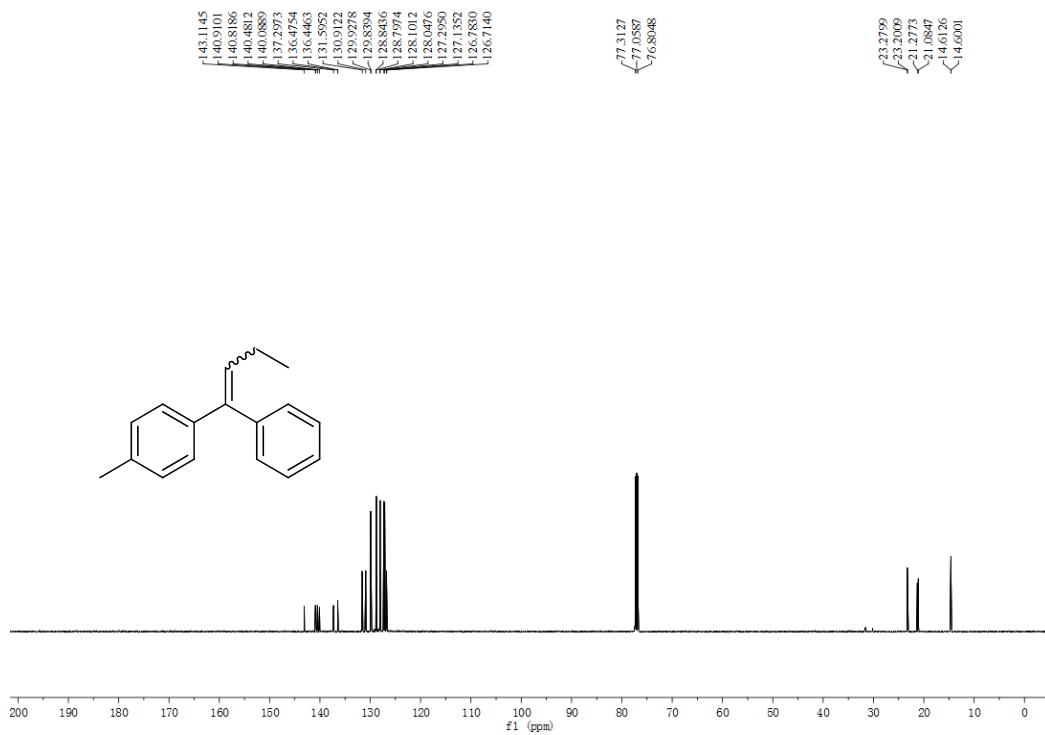

### 3f (Z/E)

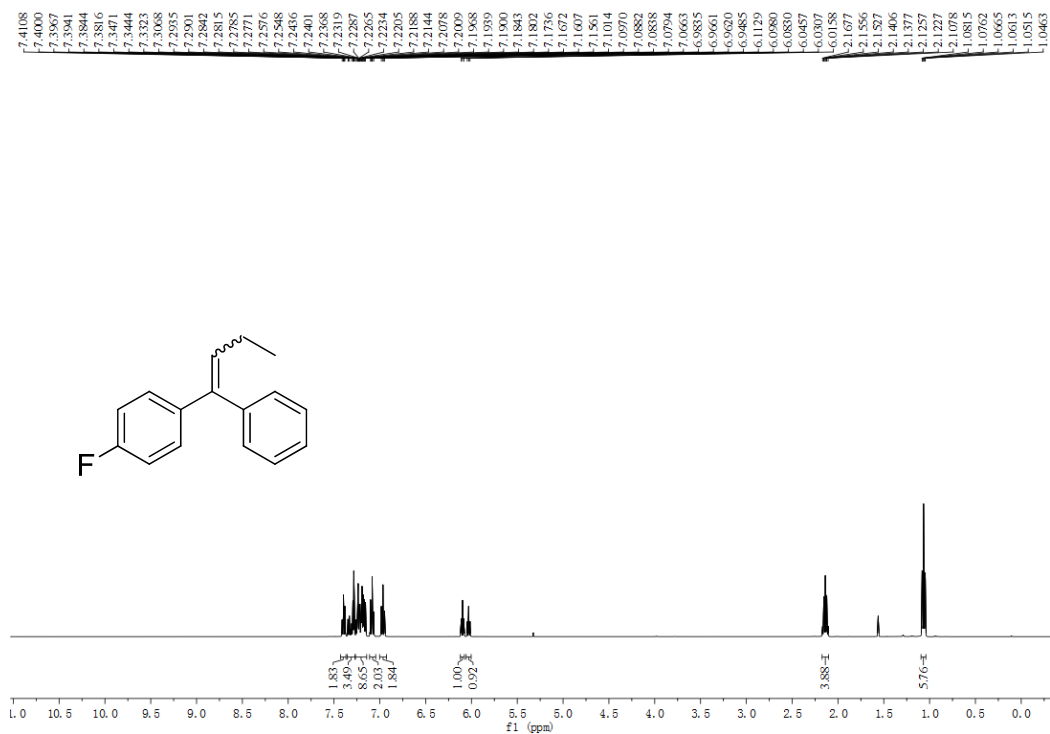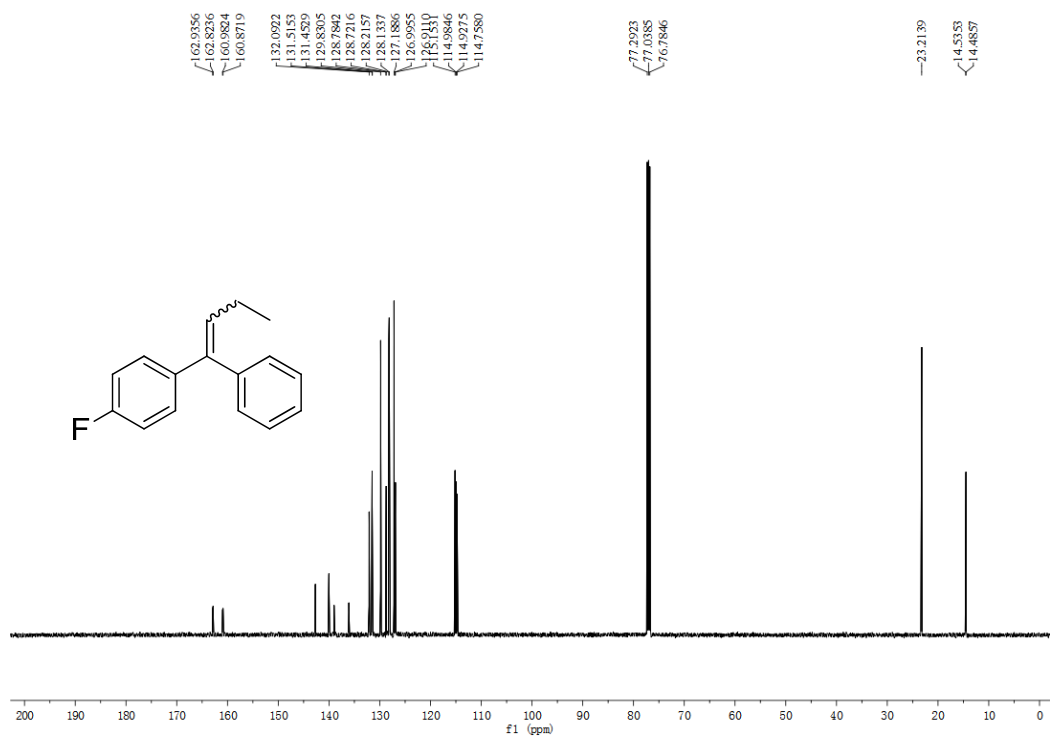

**3g (Z/E)**

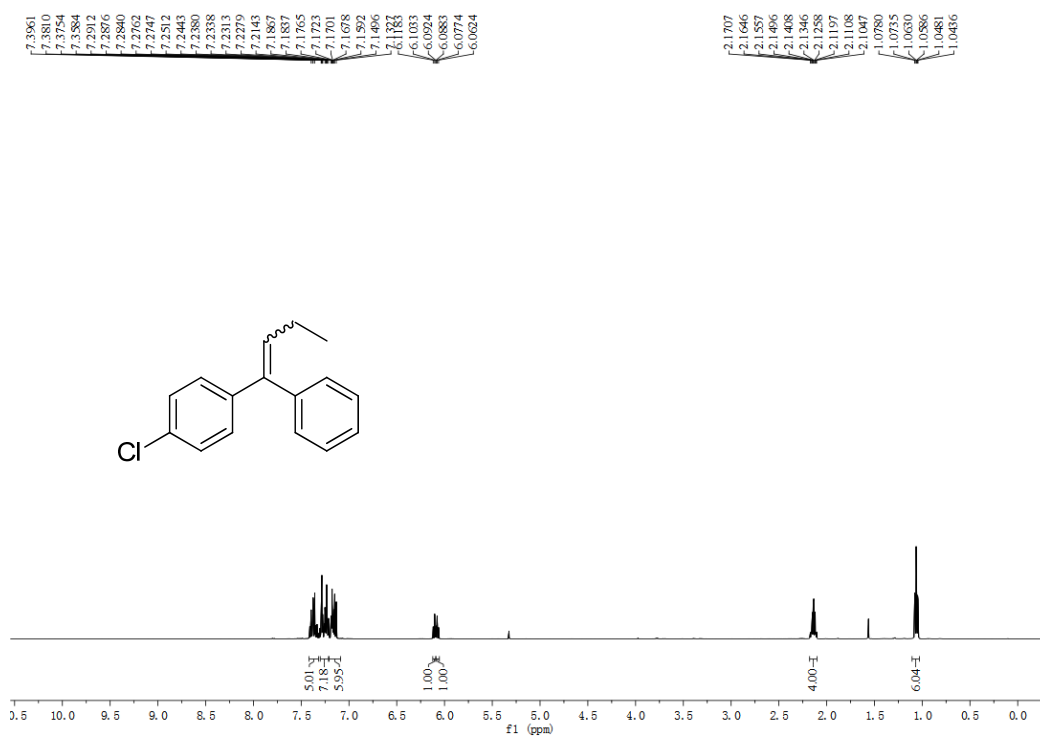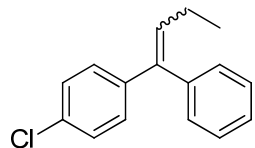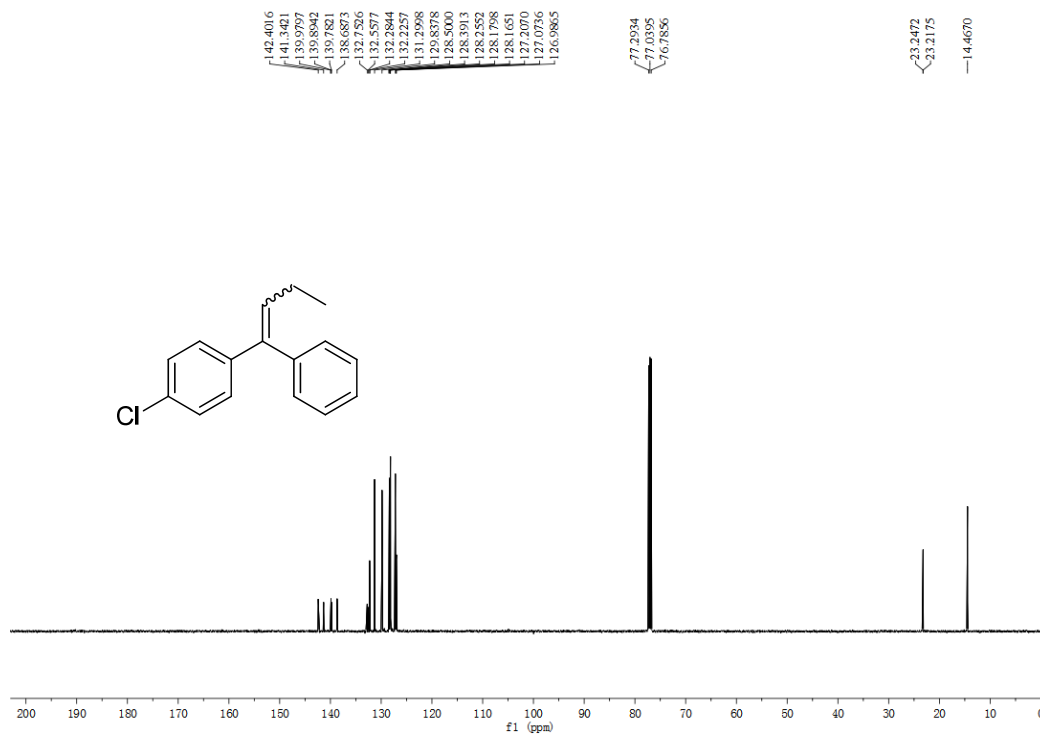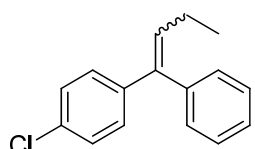

### 3h (Z/E)

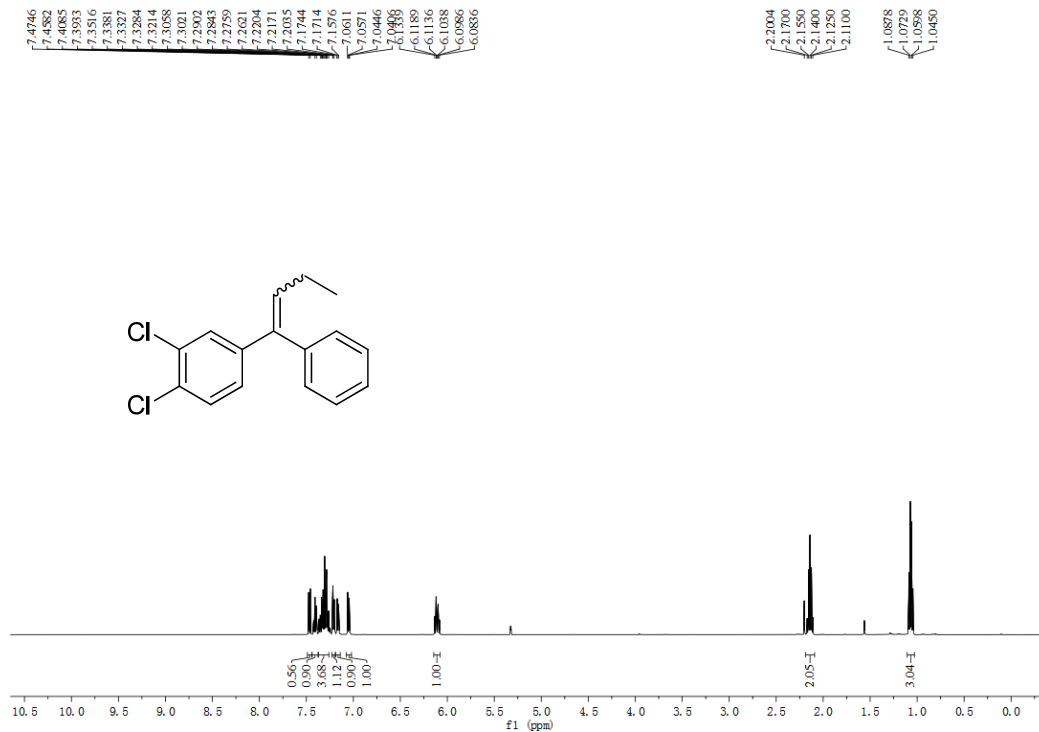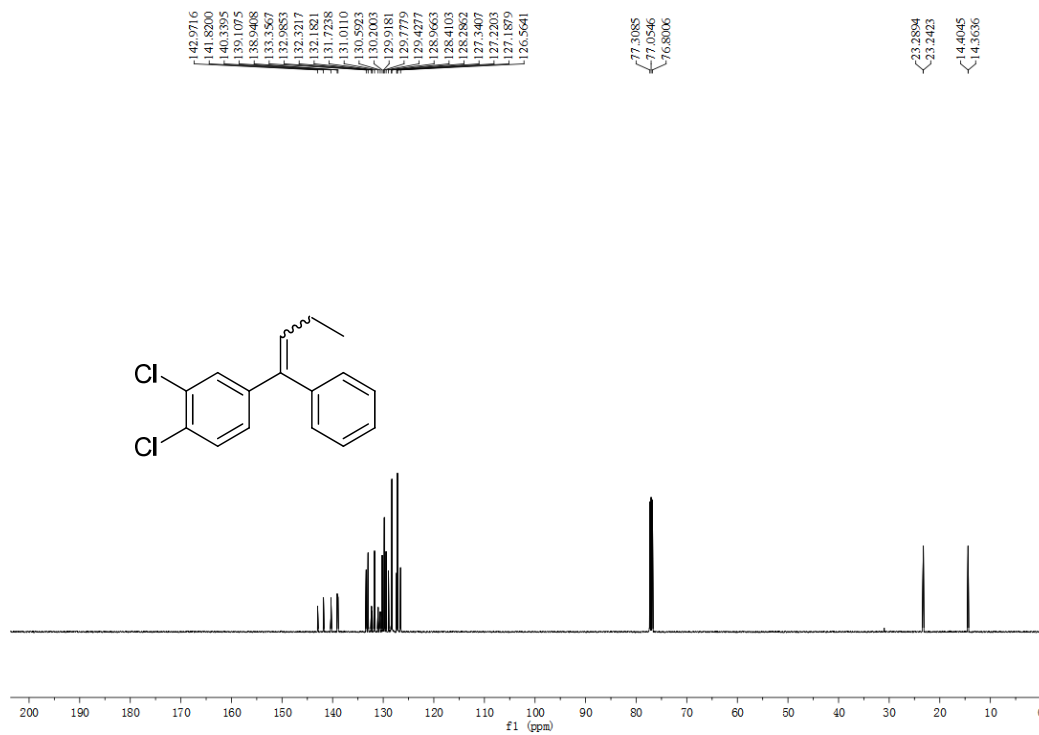



3i(E)

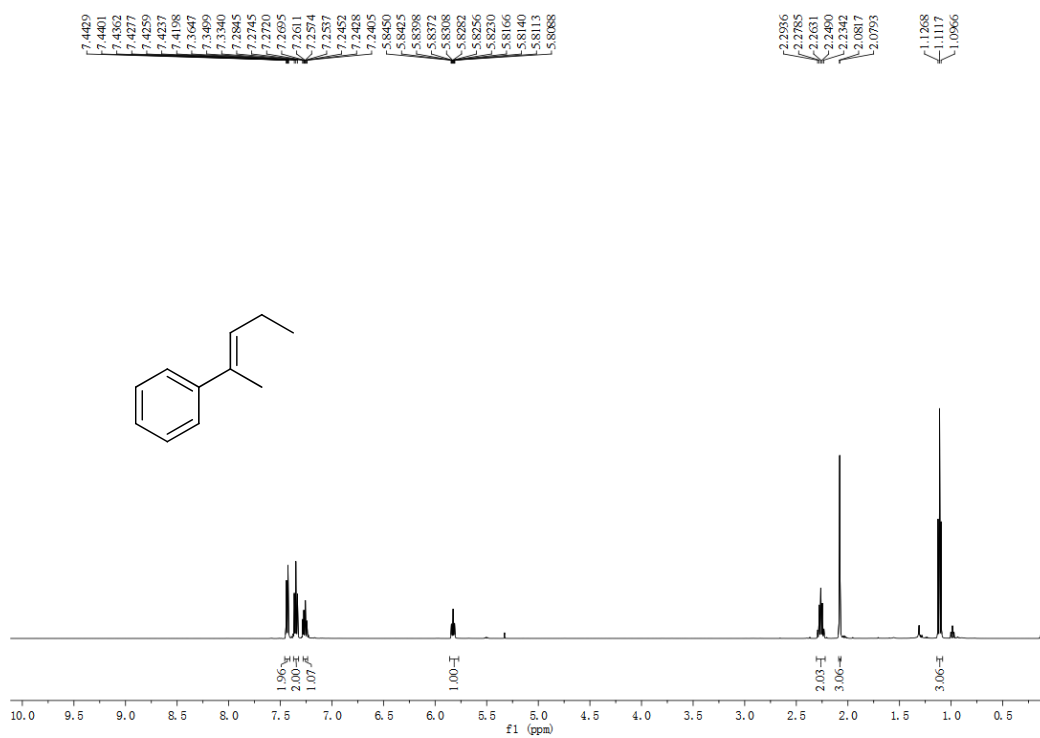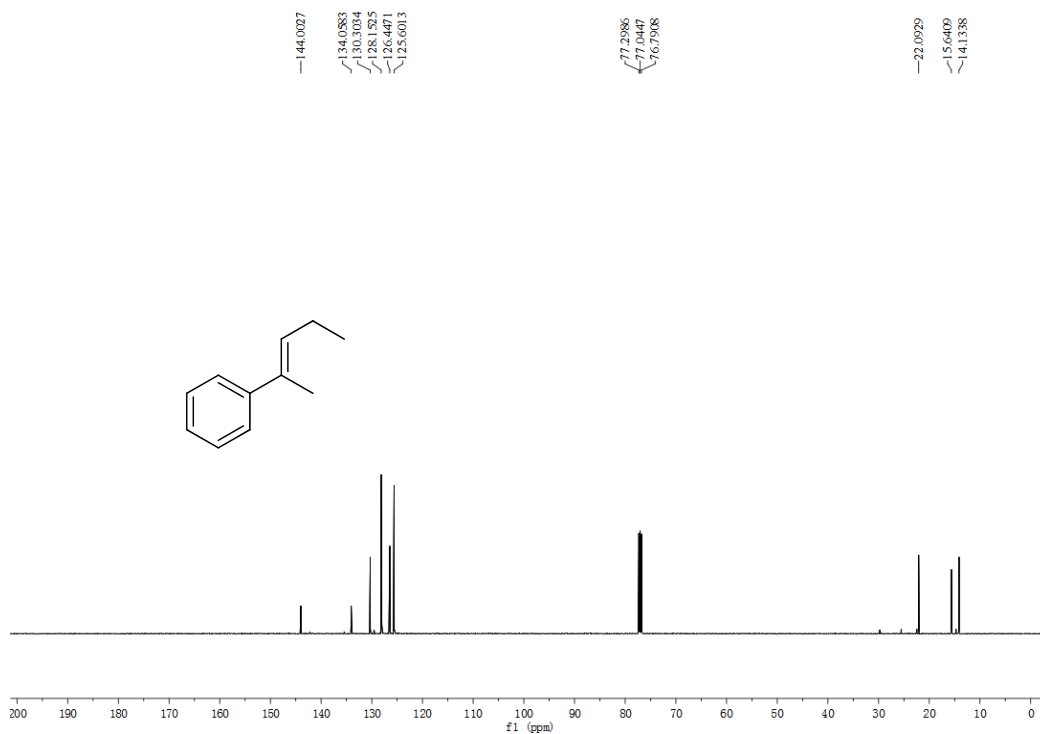

3i(Z)

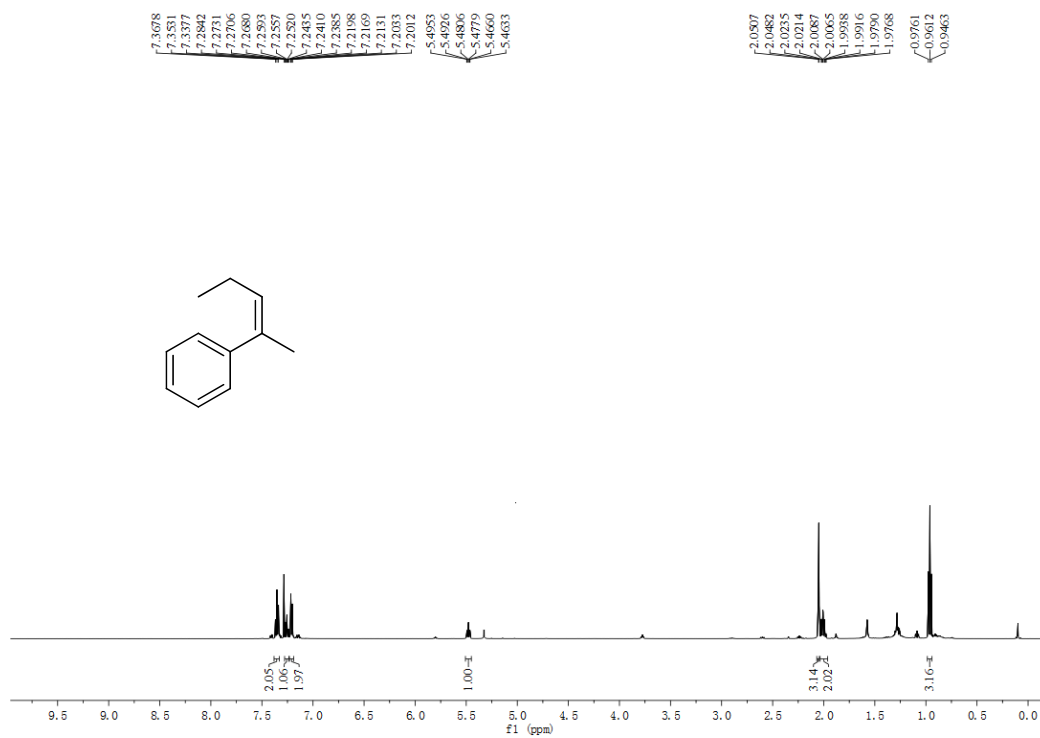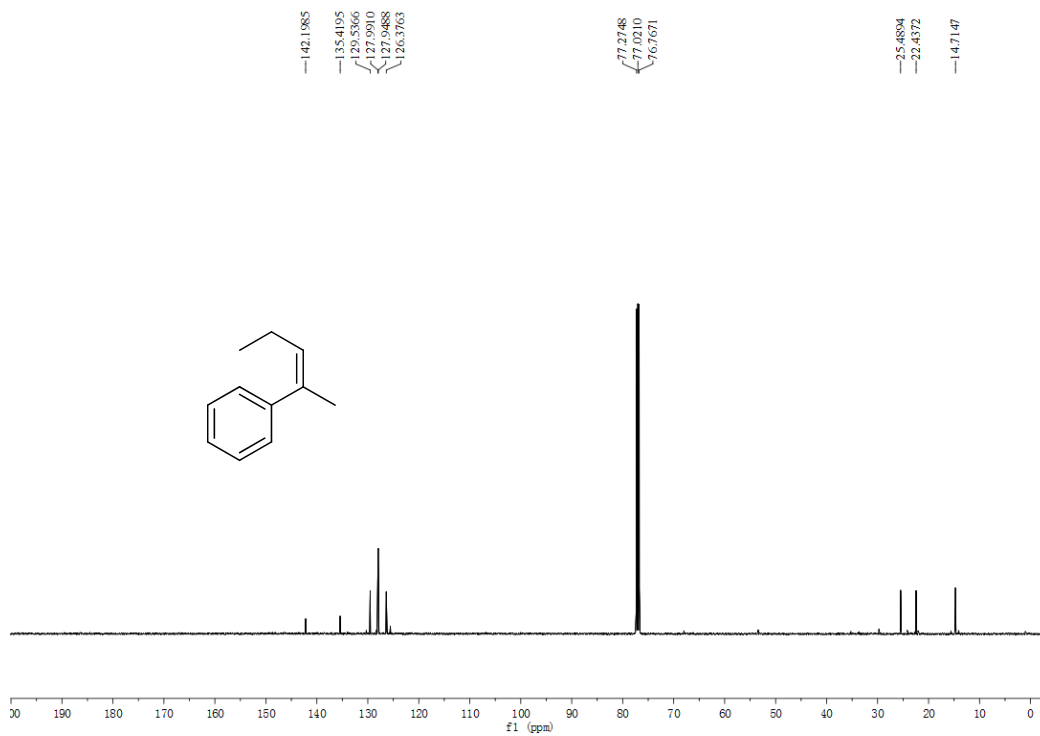

**3ia(E)**

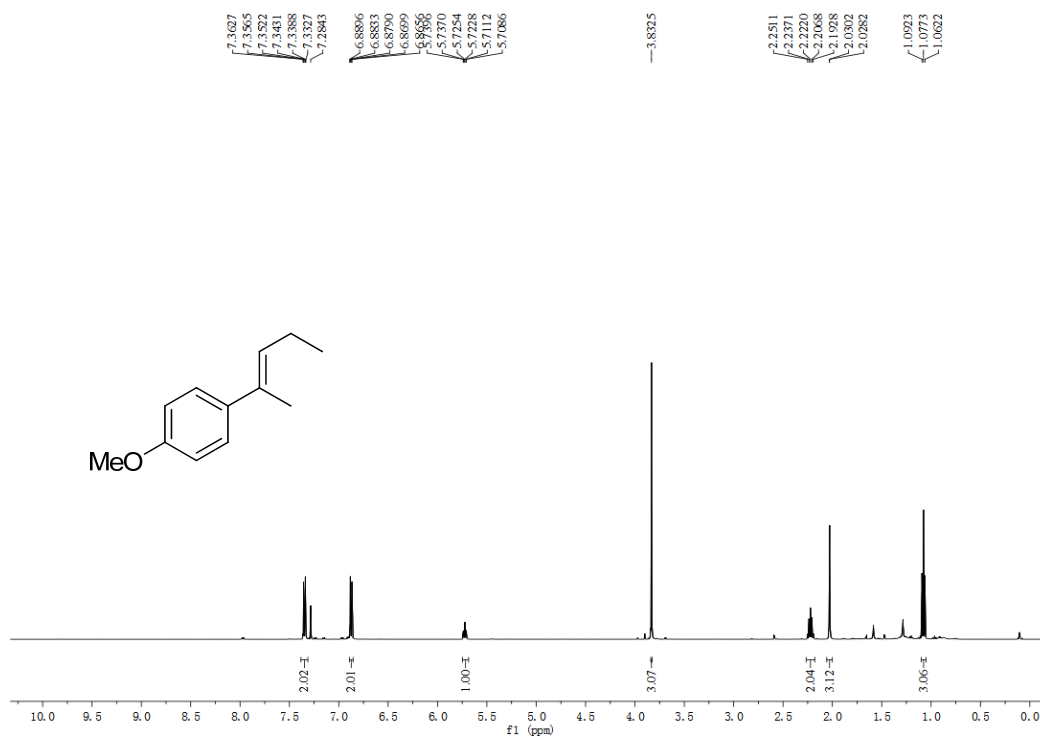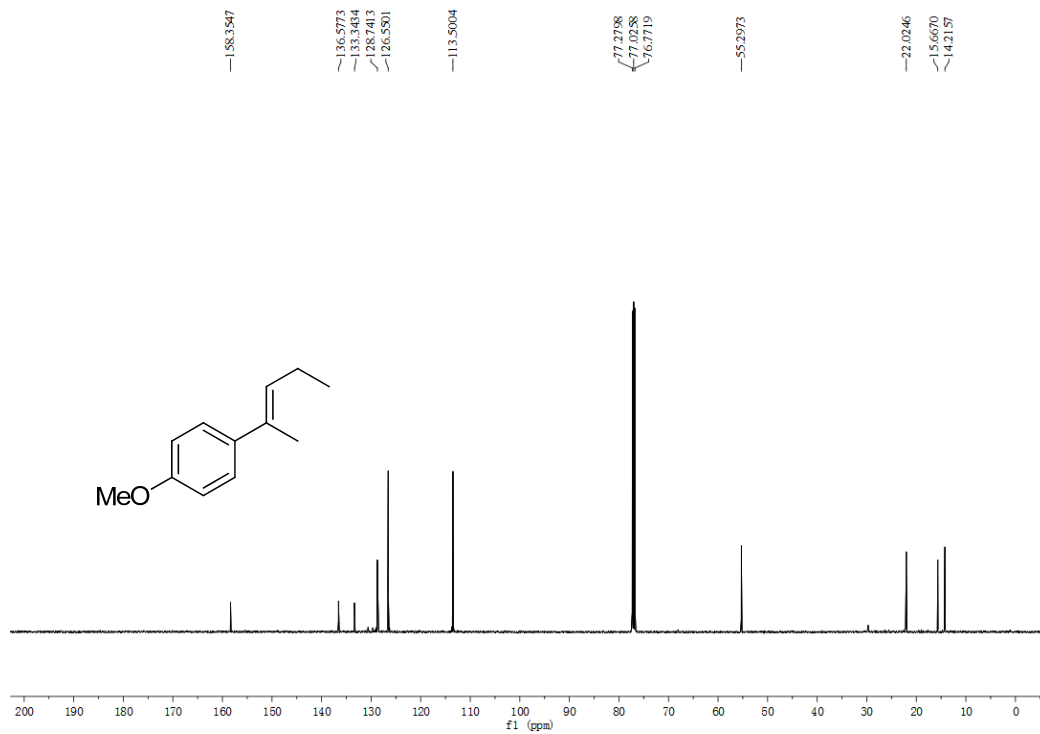

3ia(Z)

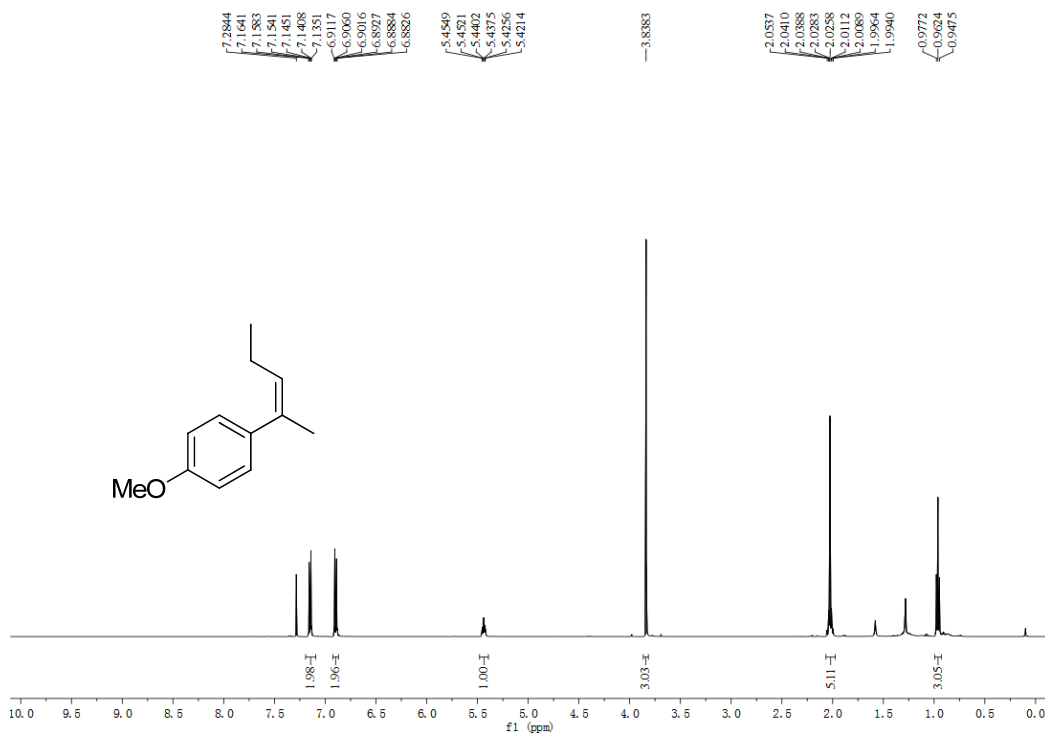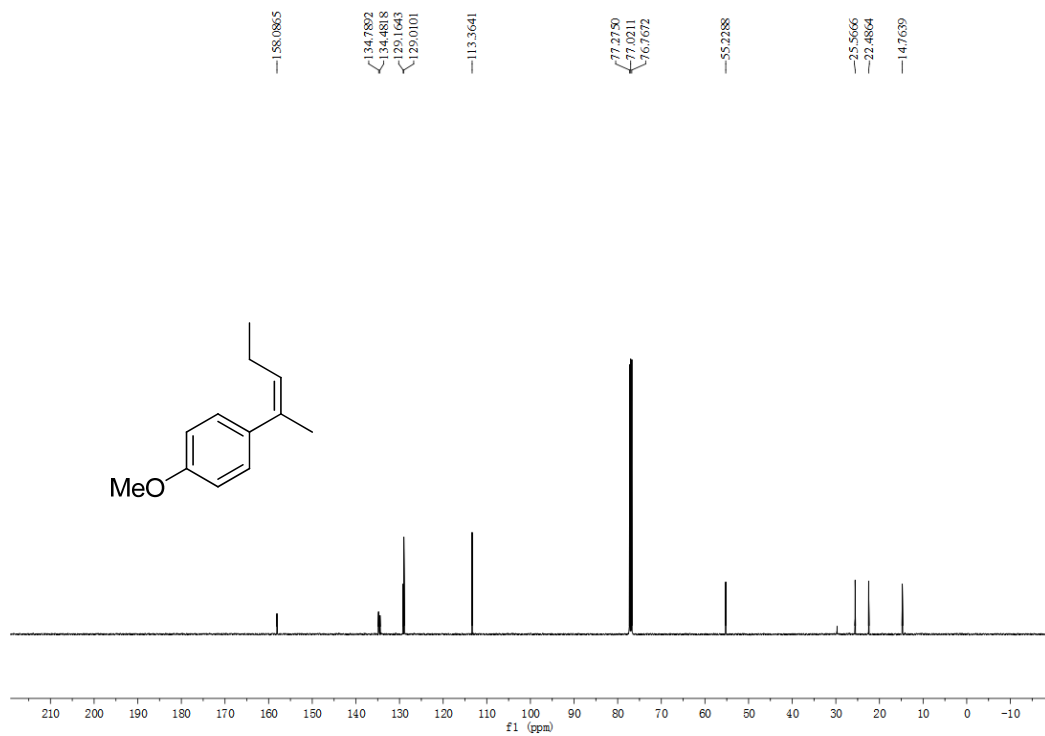

**3ib(E)**

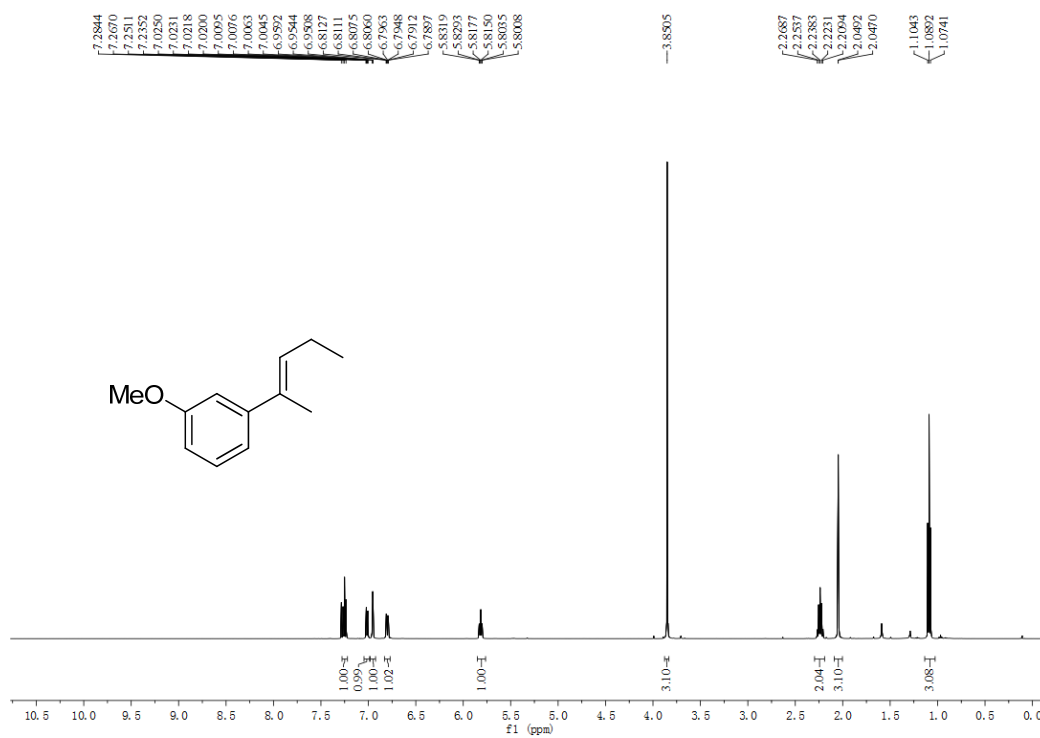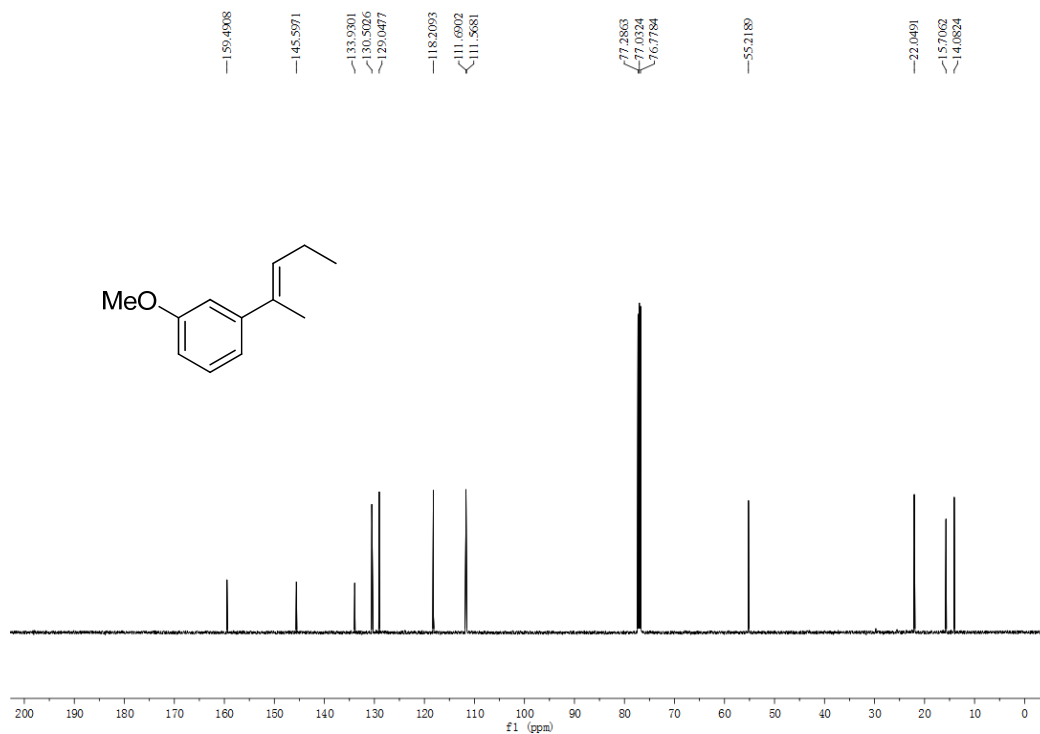

3ib(Z)

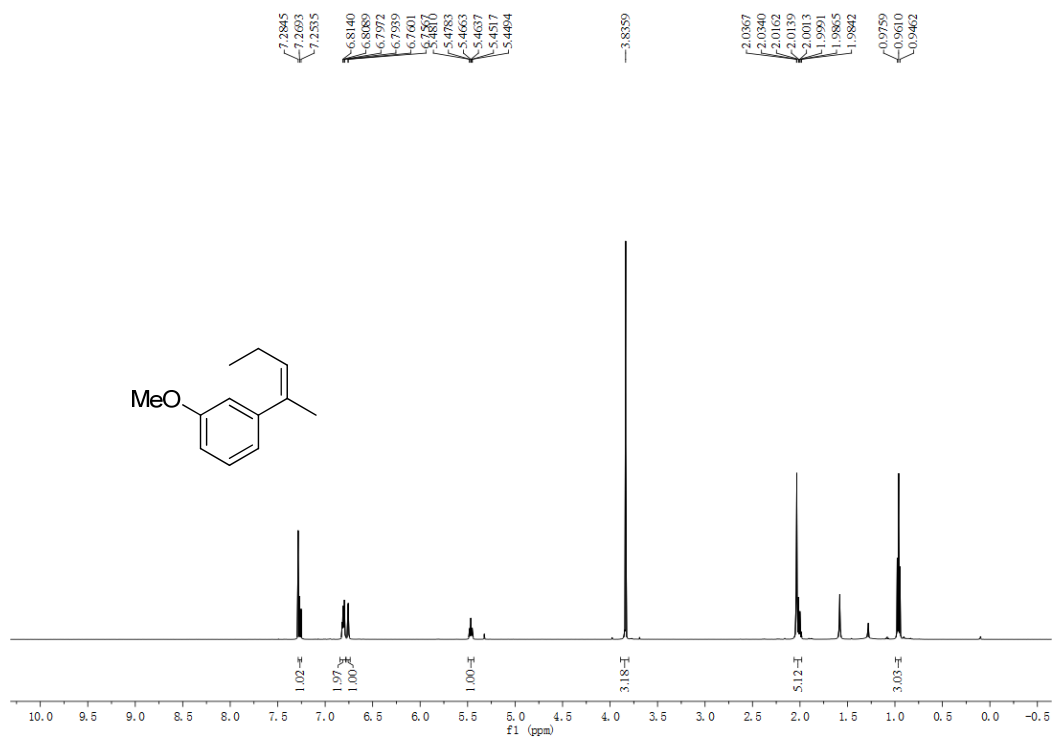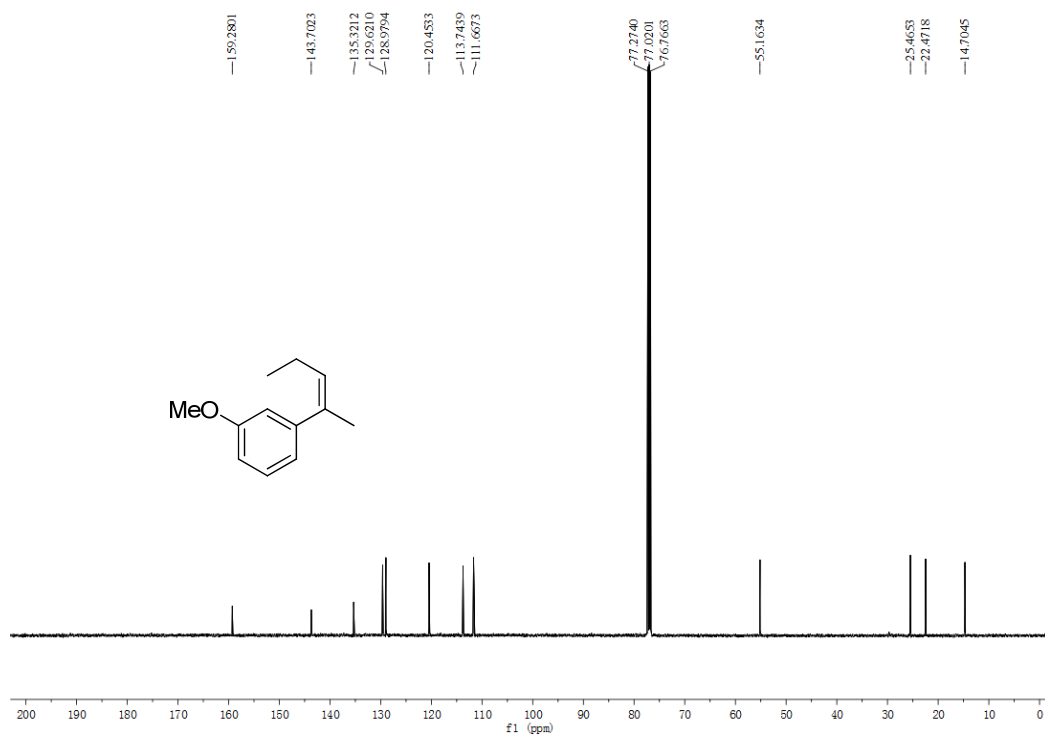

**3ic(E)**

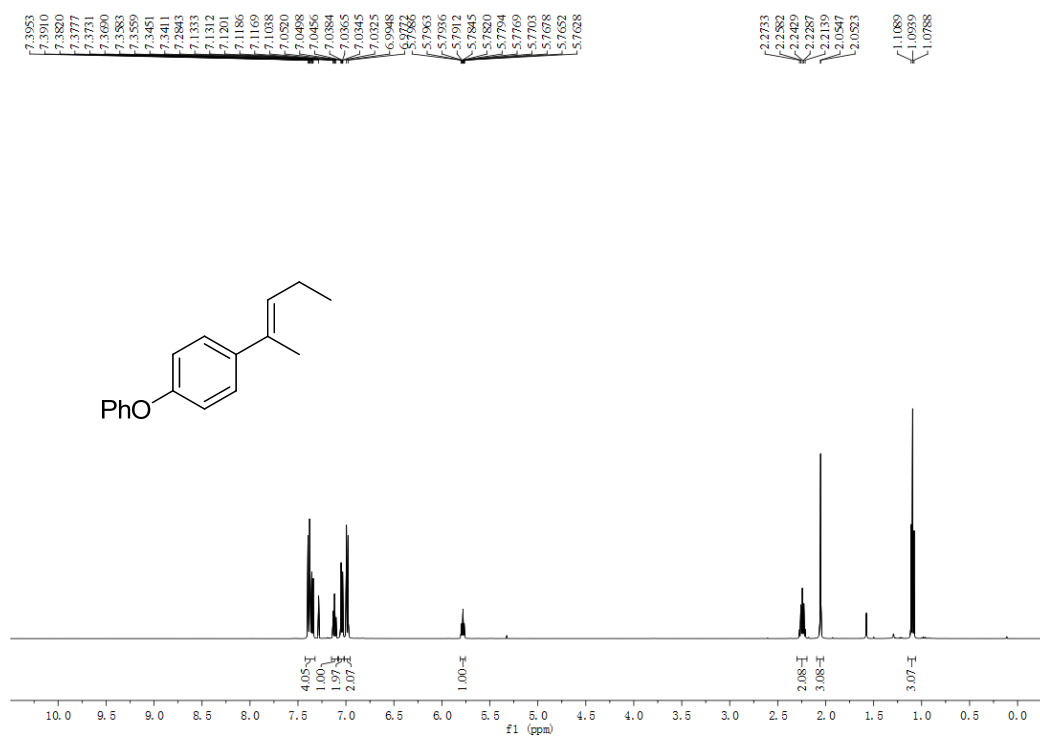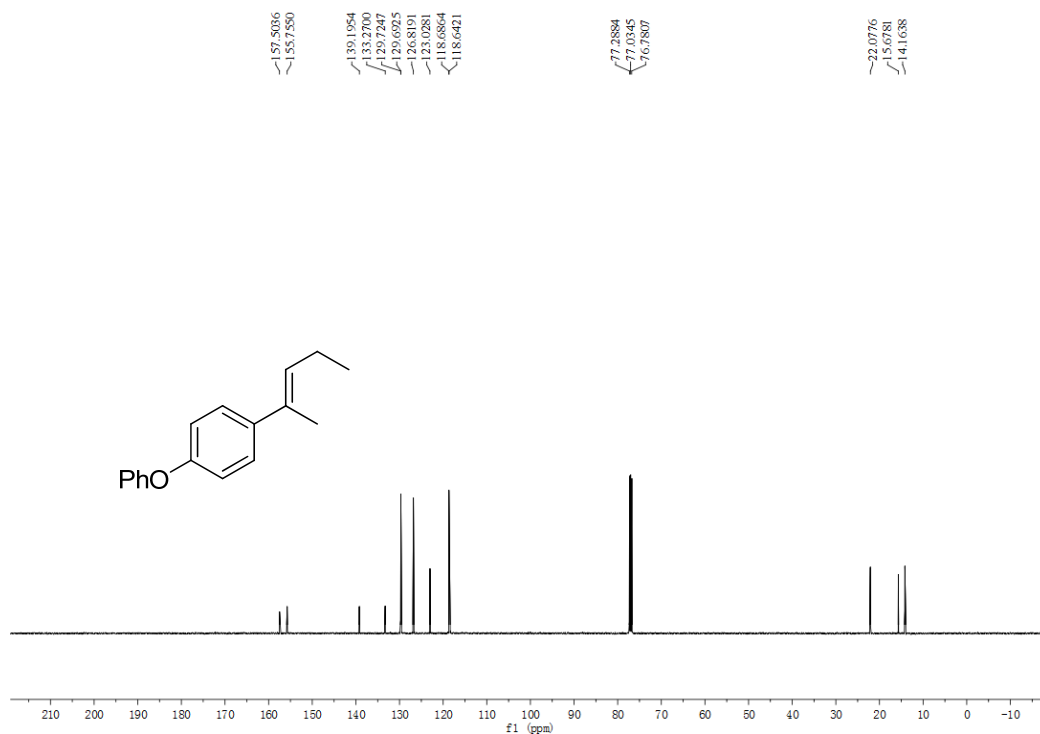

### 3ic(Z)

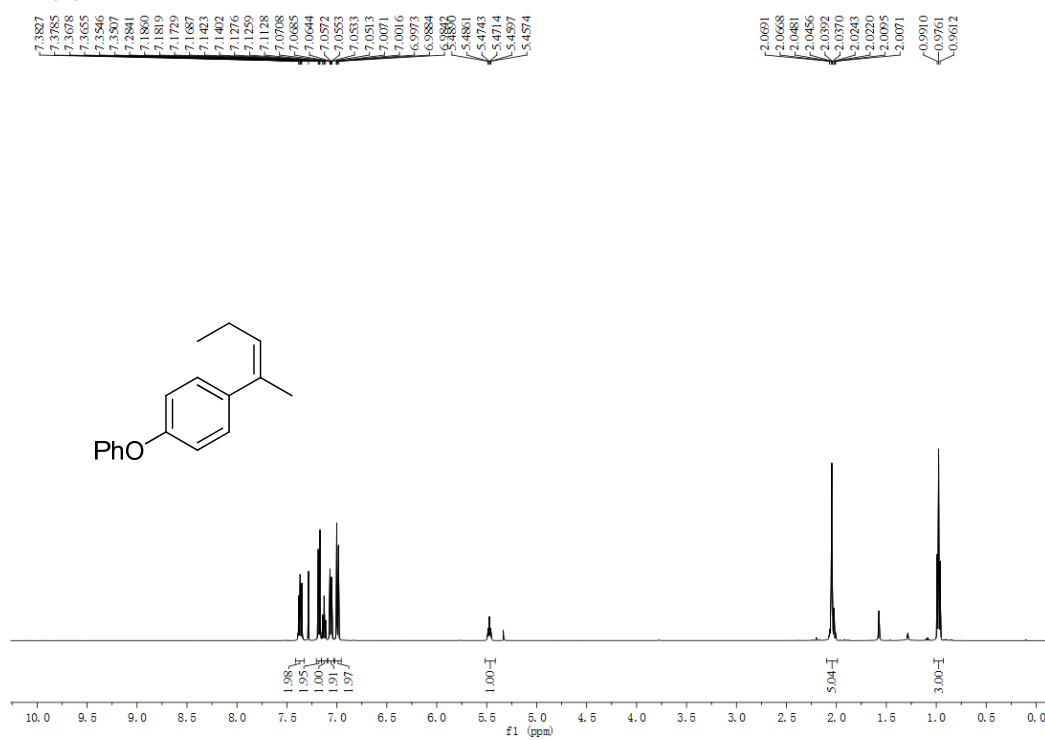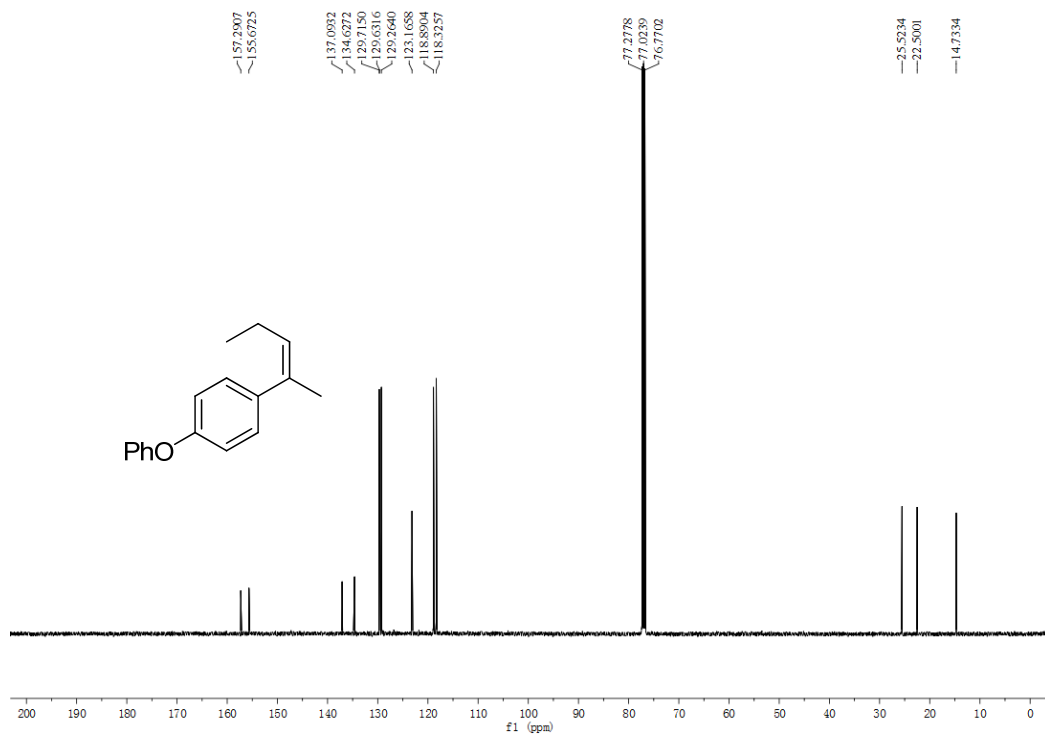



3id(E)

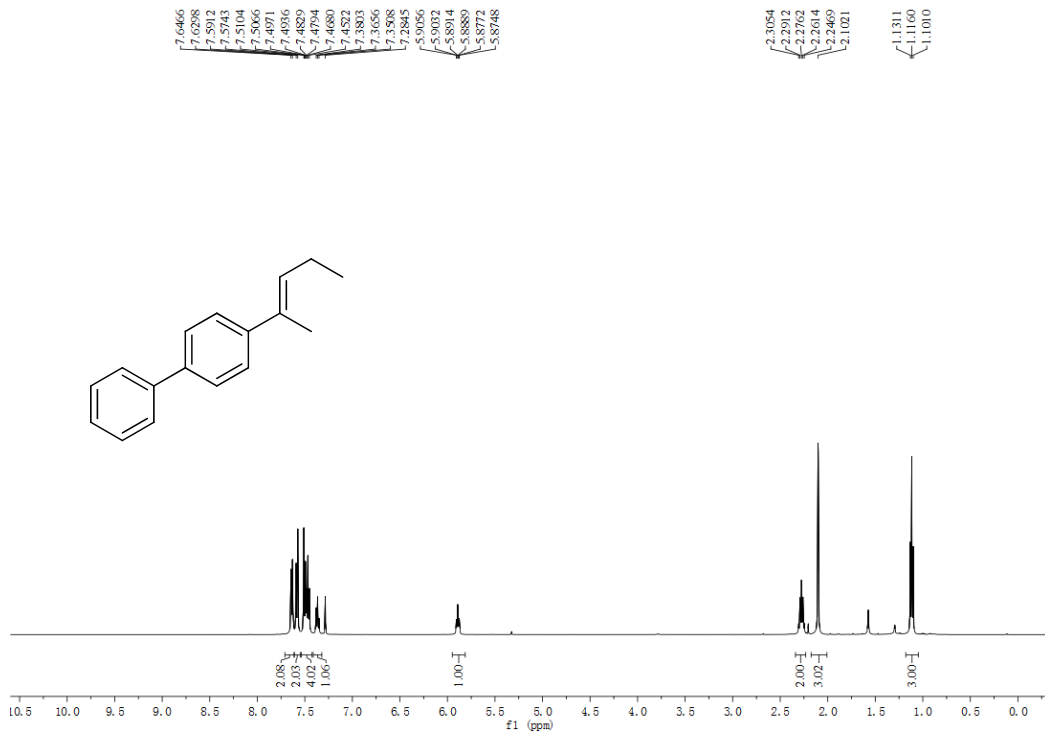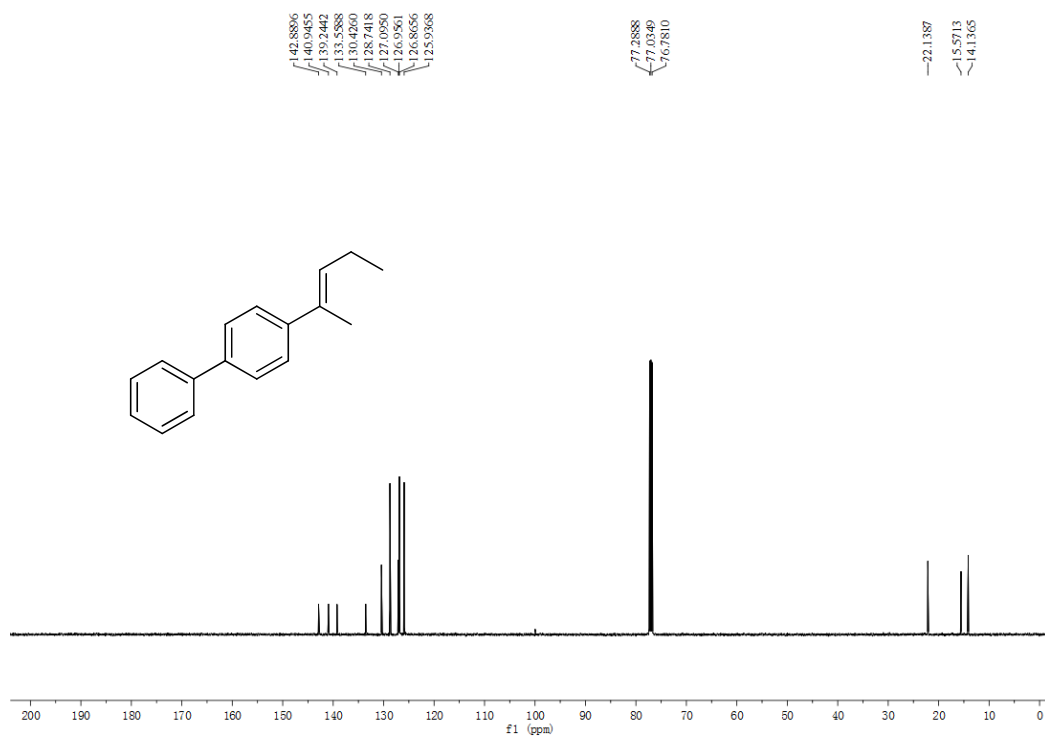

3id(Z)

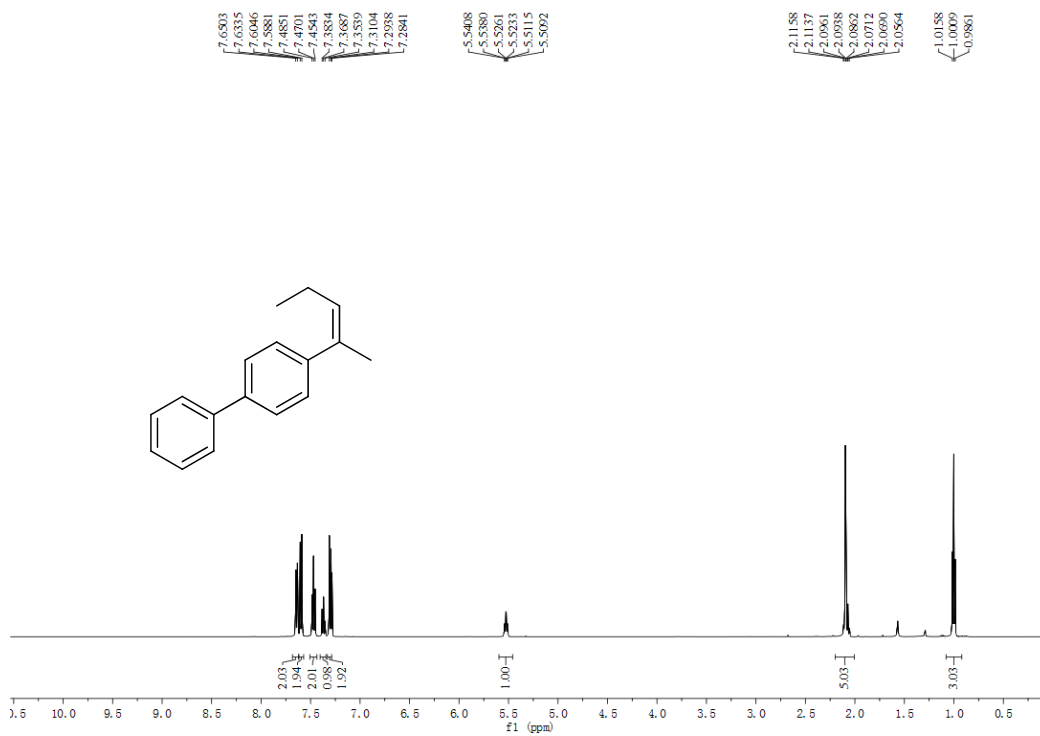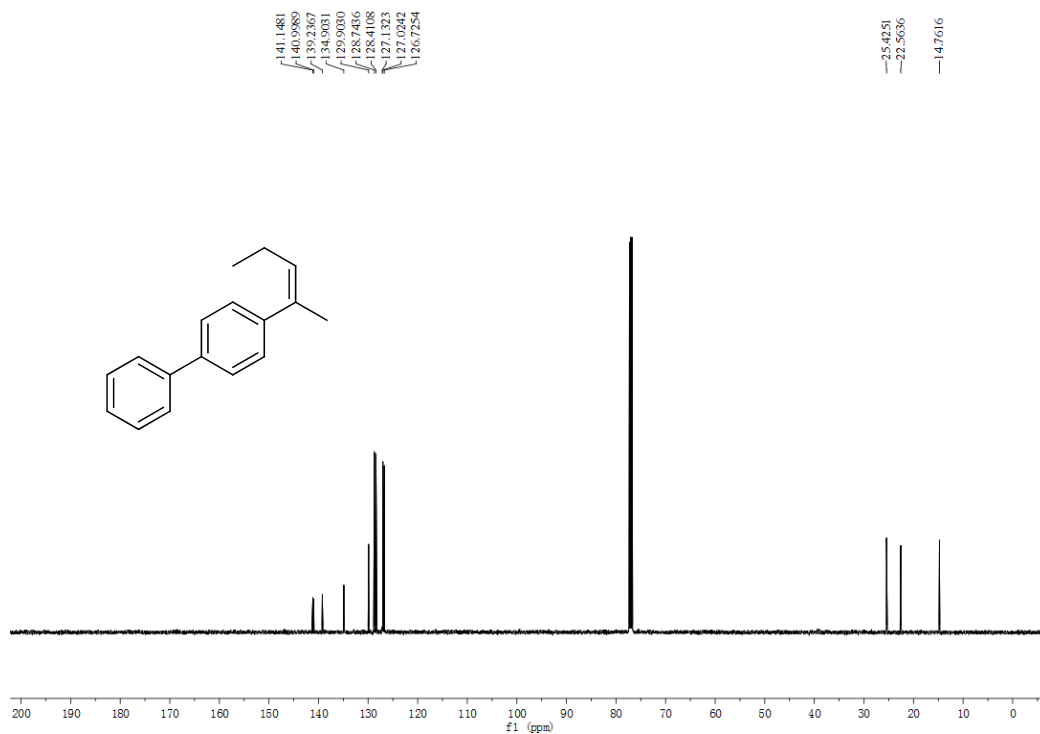

**3ie(E)**

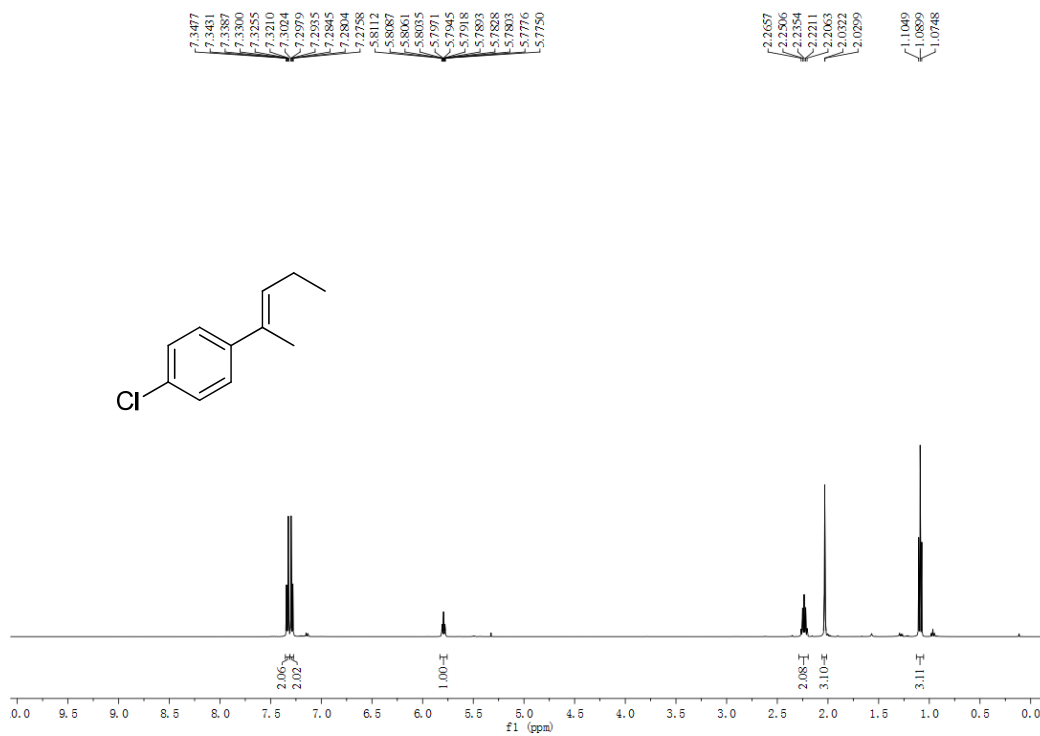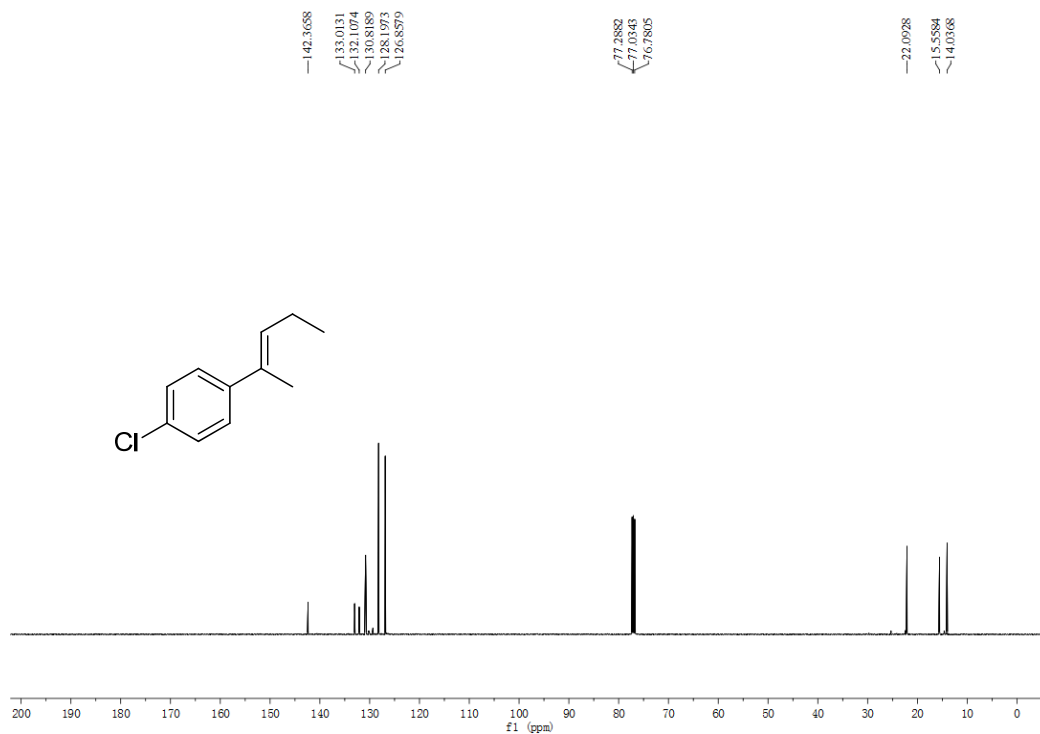

3i(*E*)

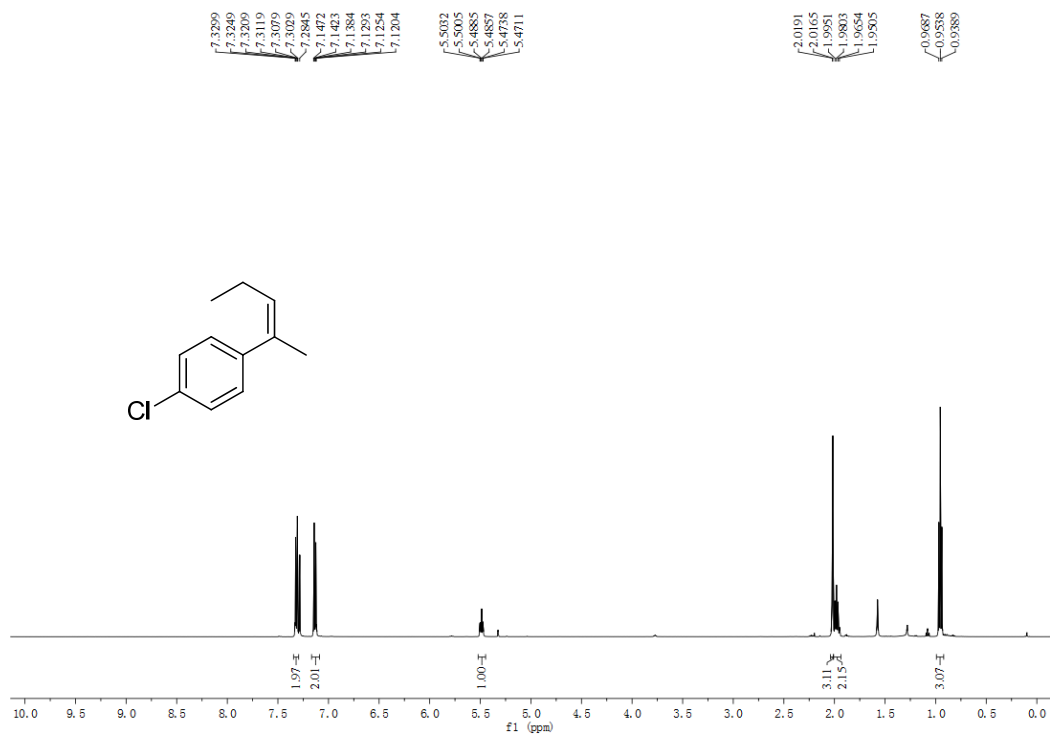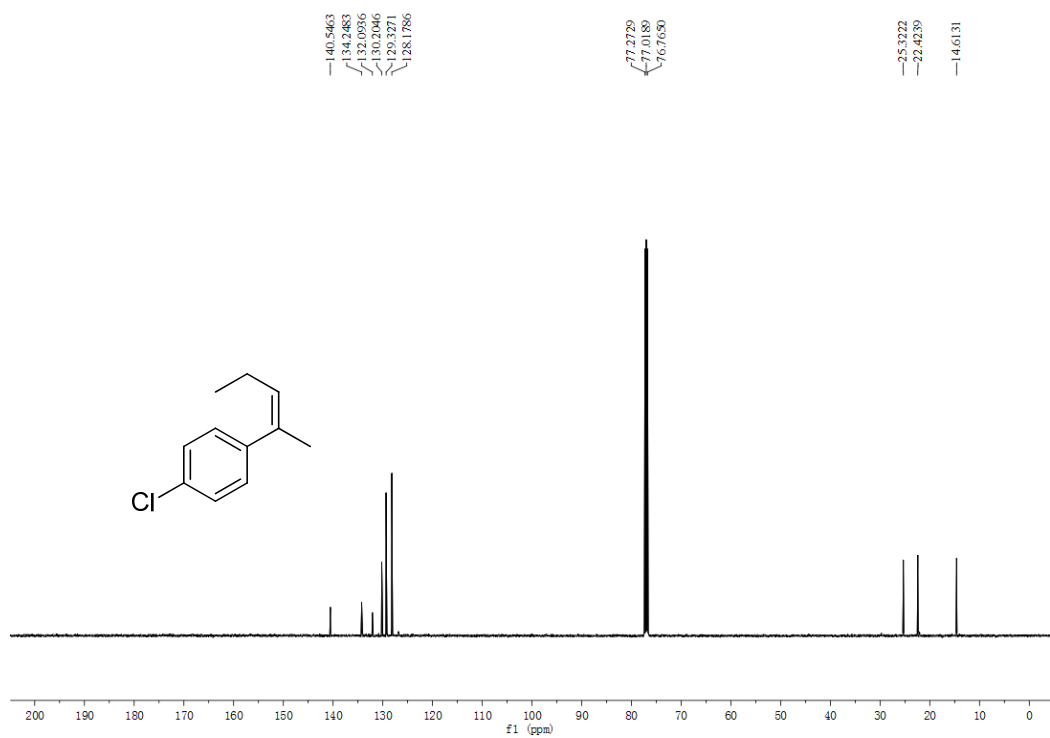

3if(E)

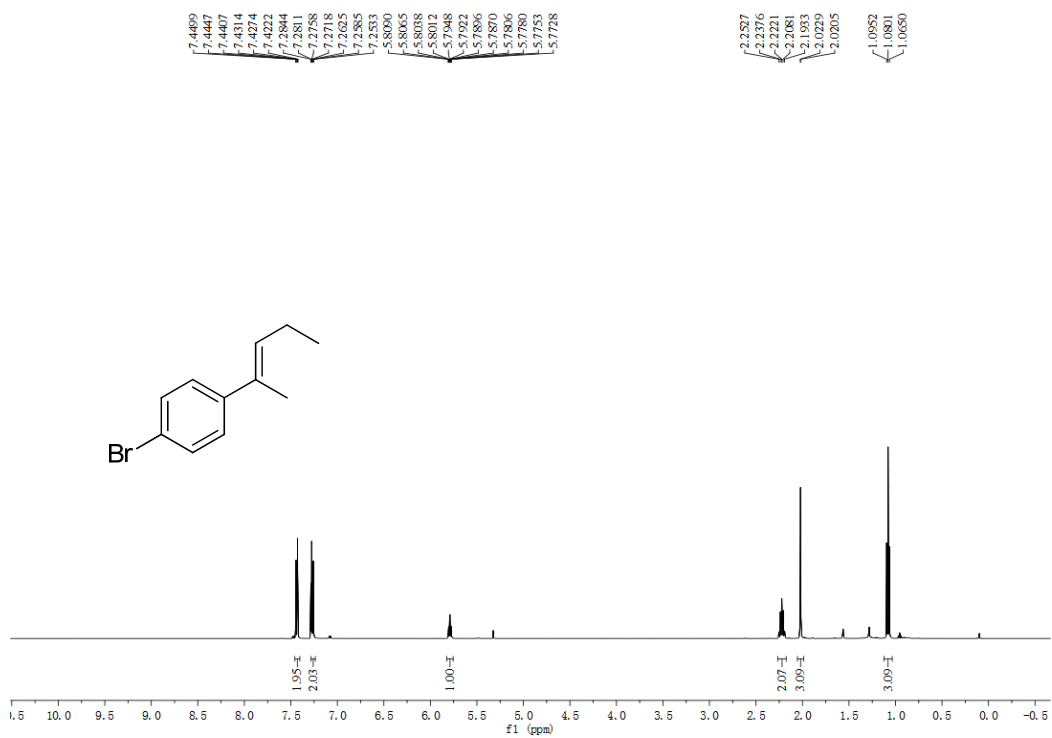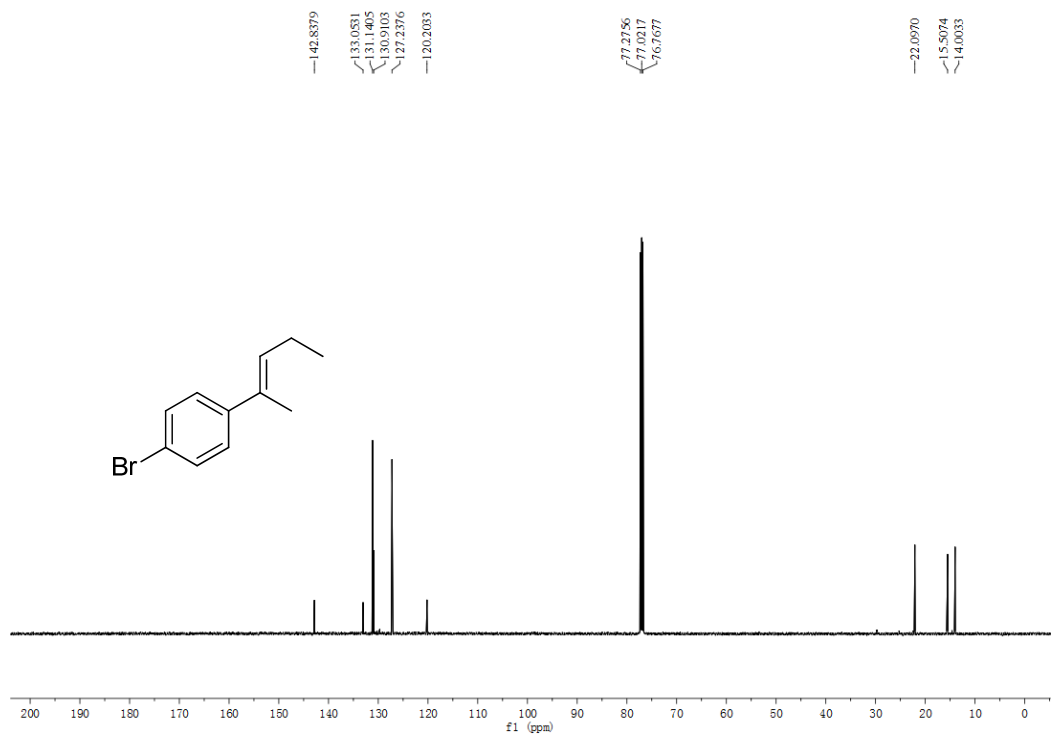

3if(Z)

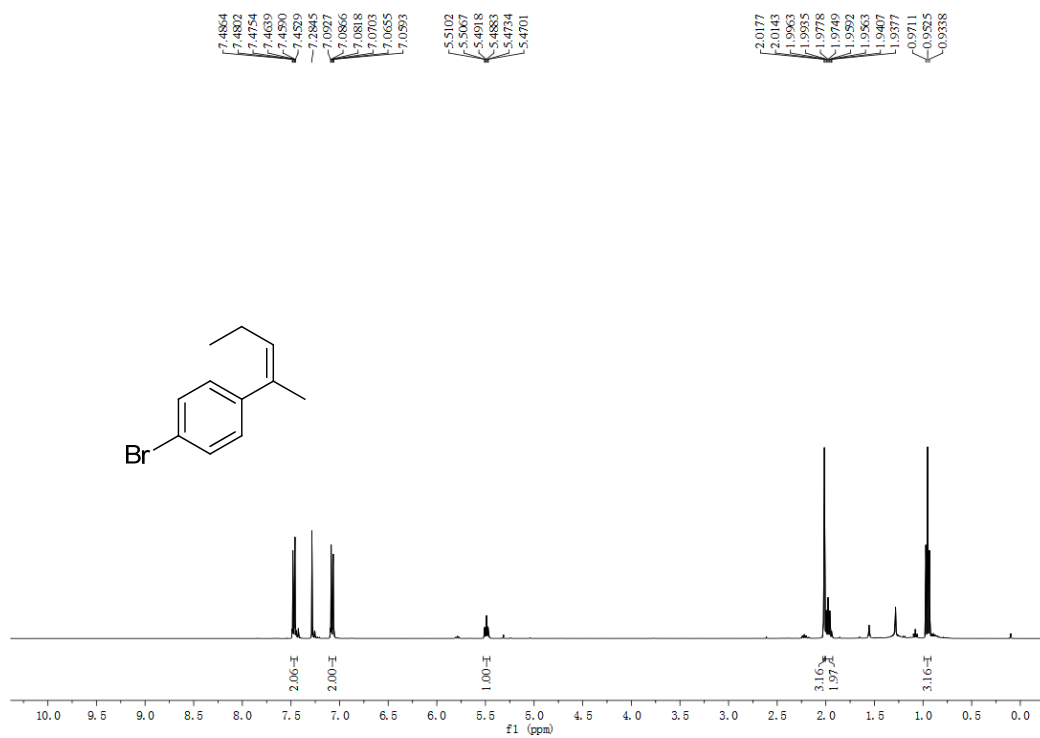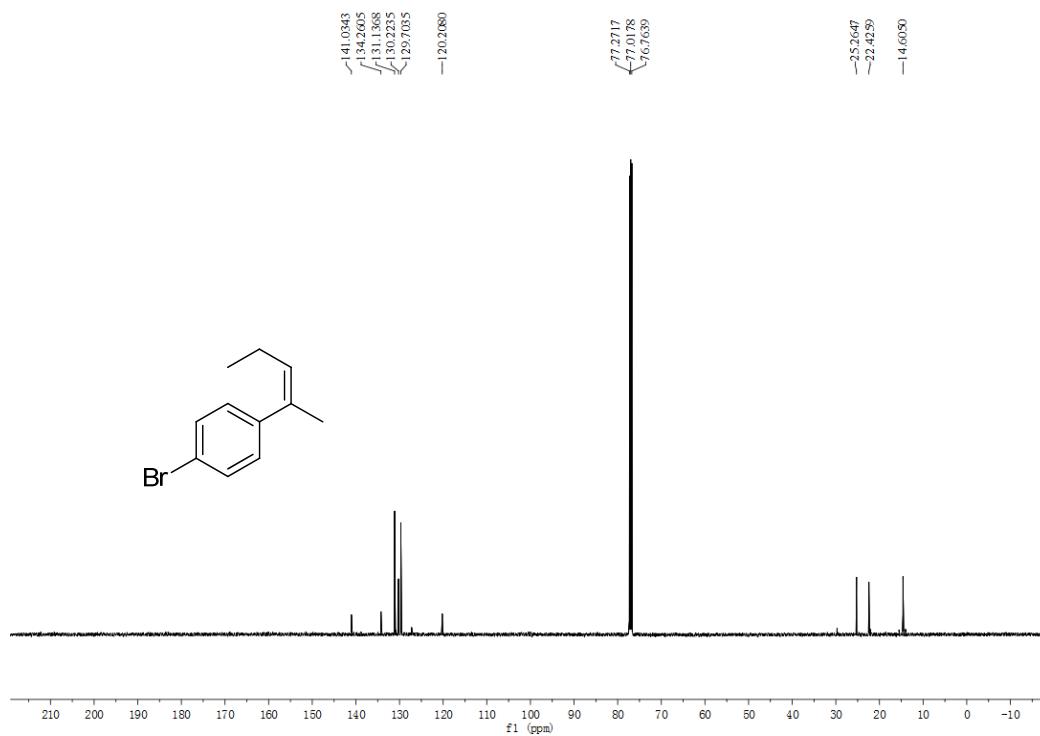

3ig

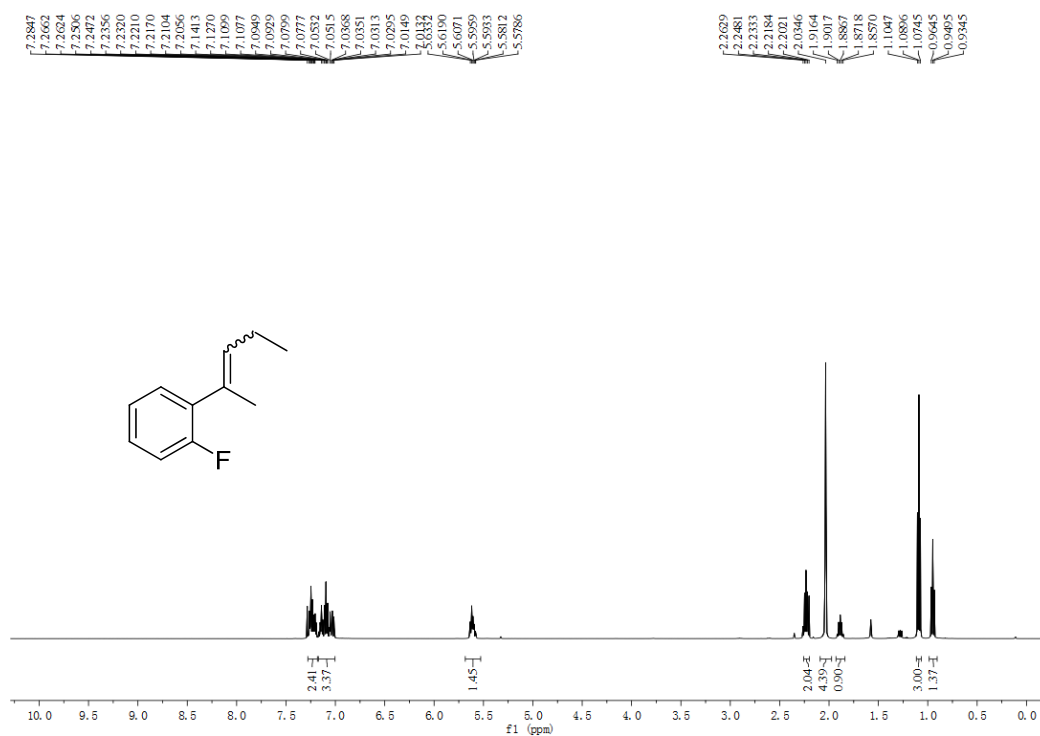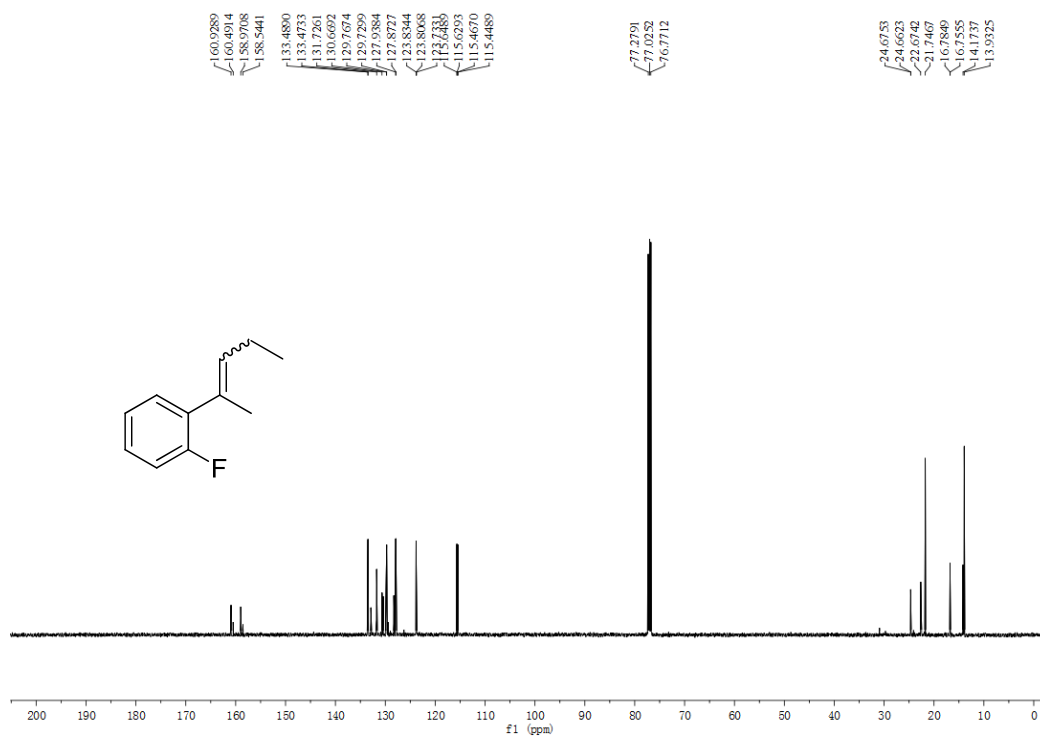

3ih

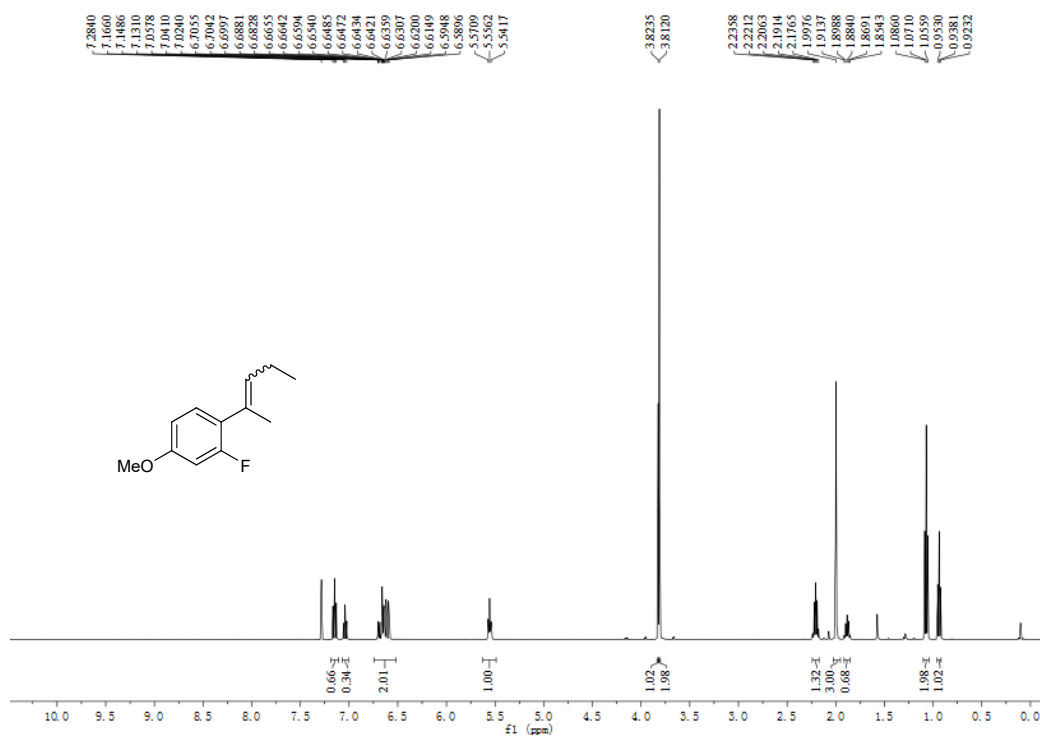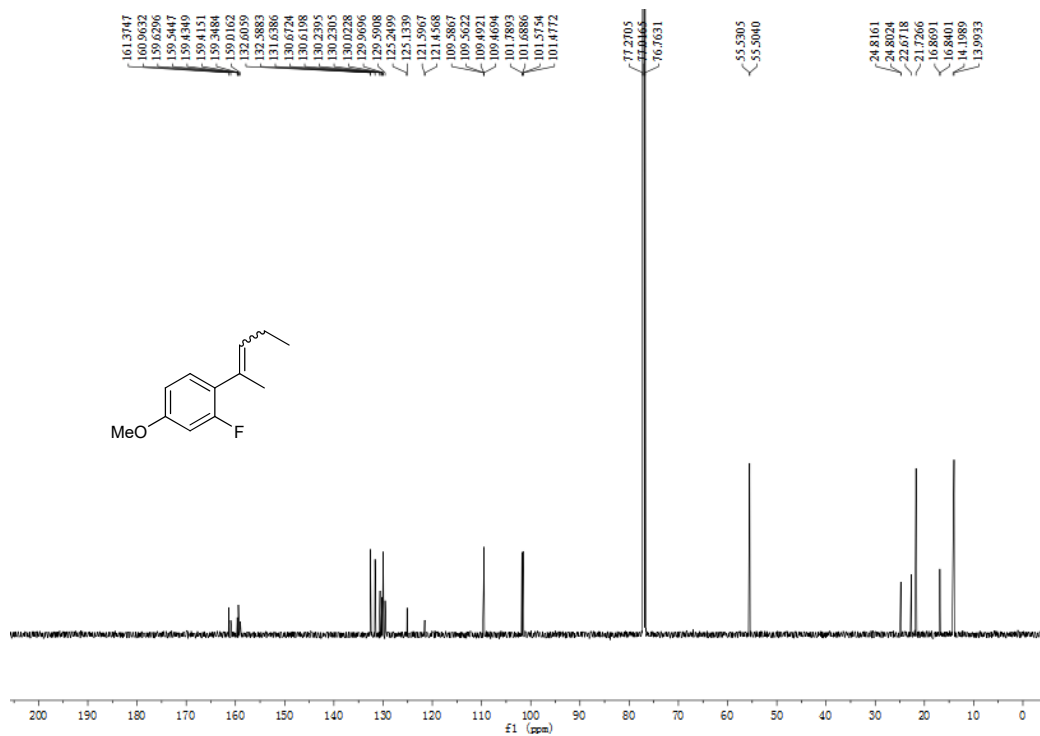



3ii(E)

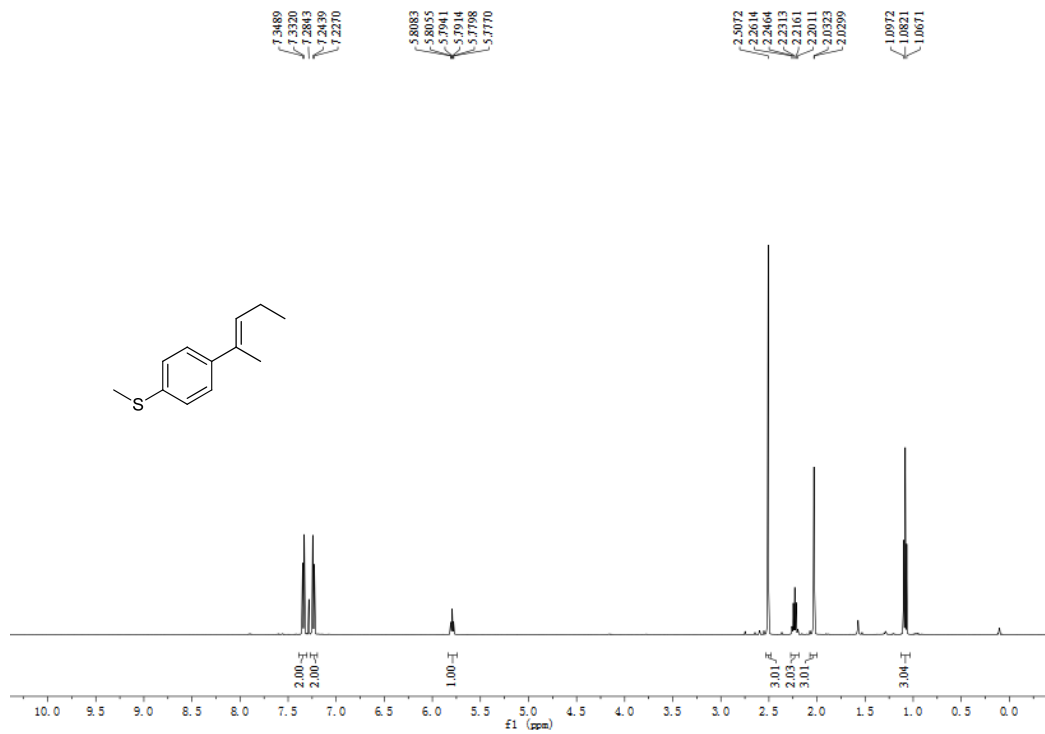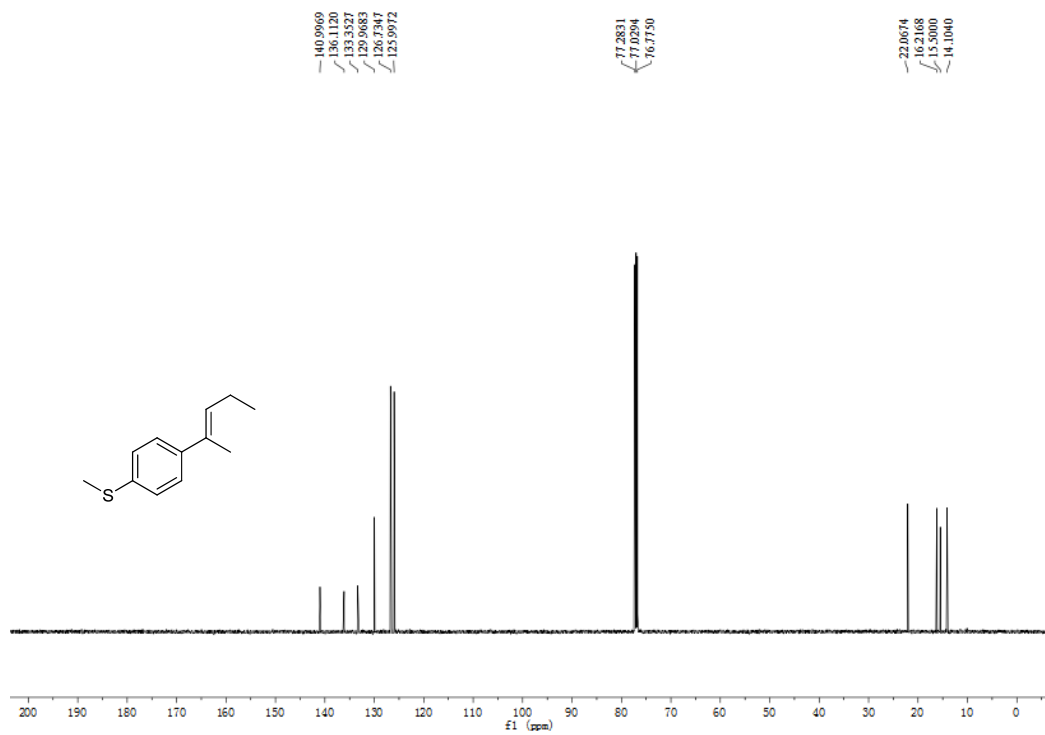

3ii(Z)

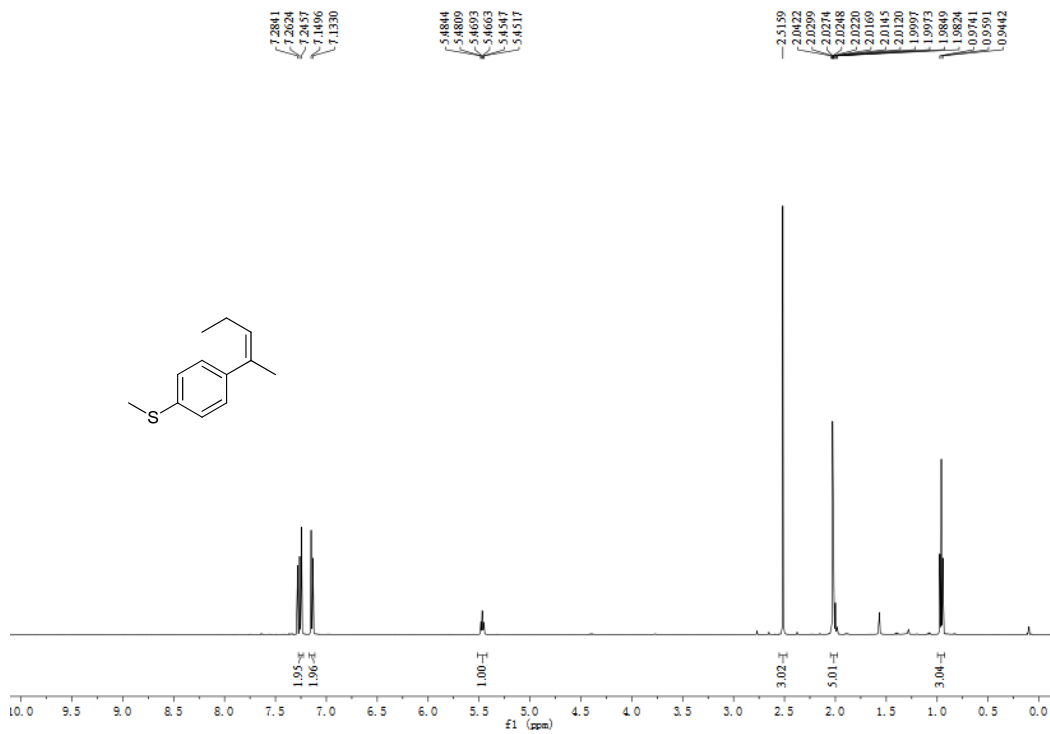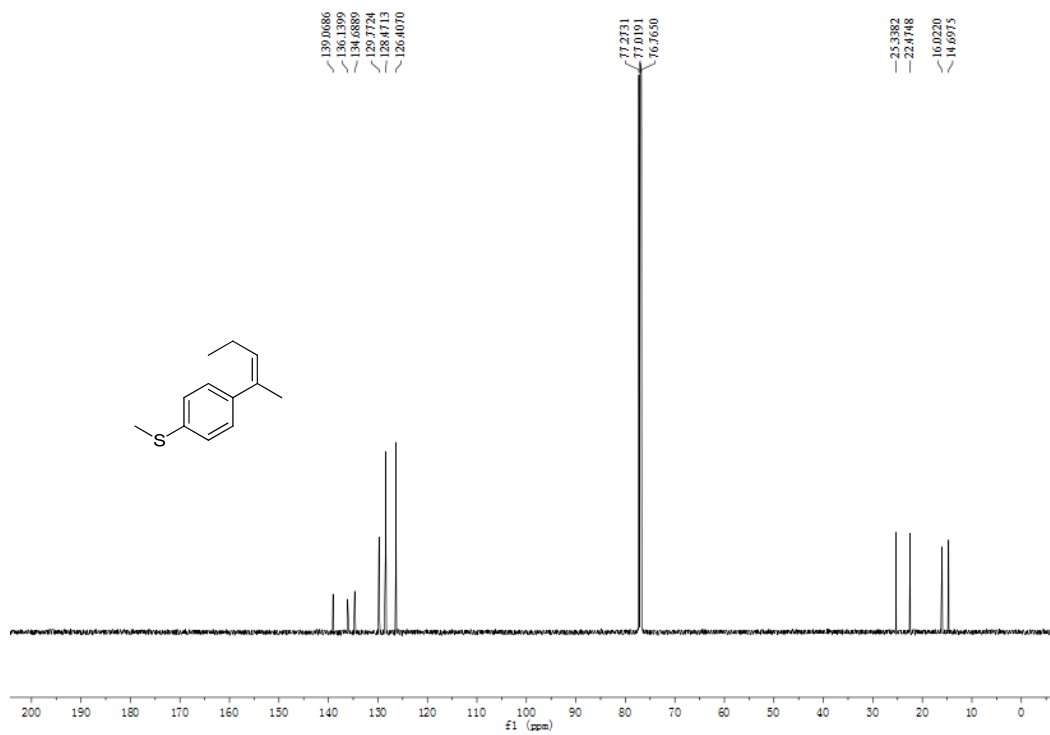

3ij

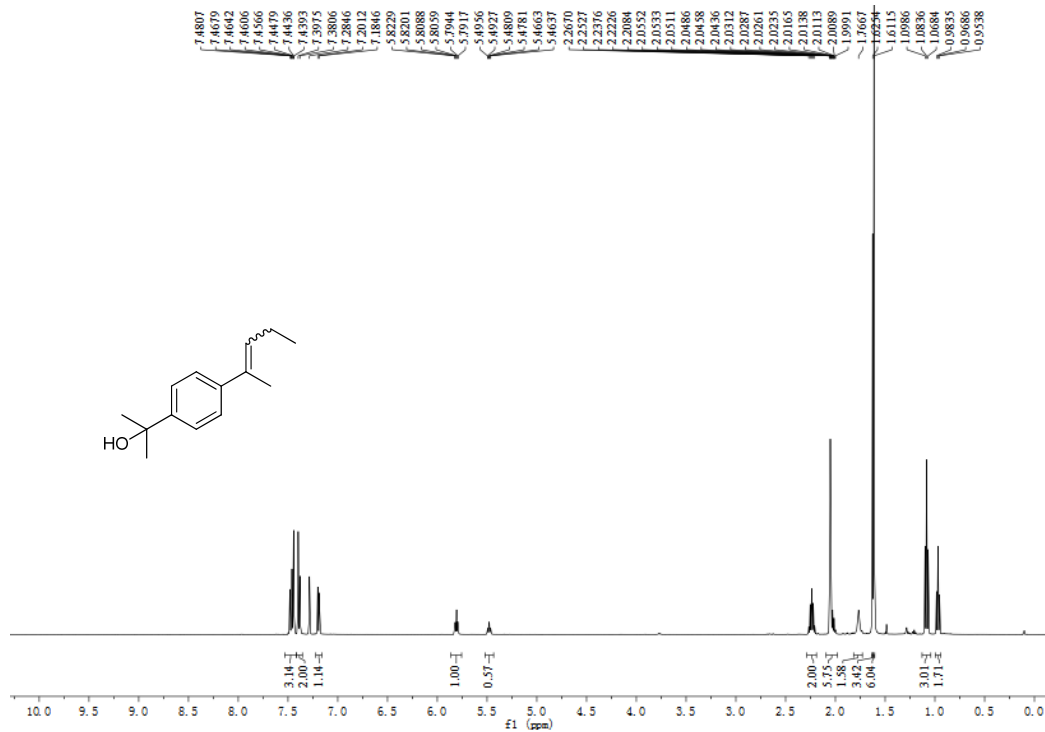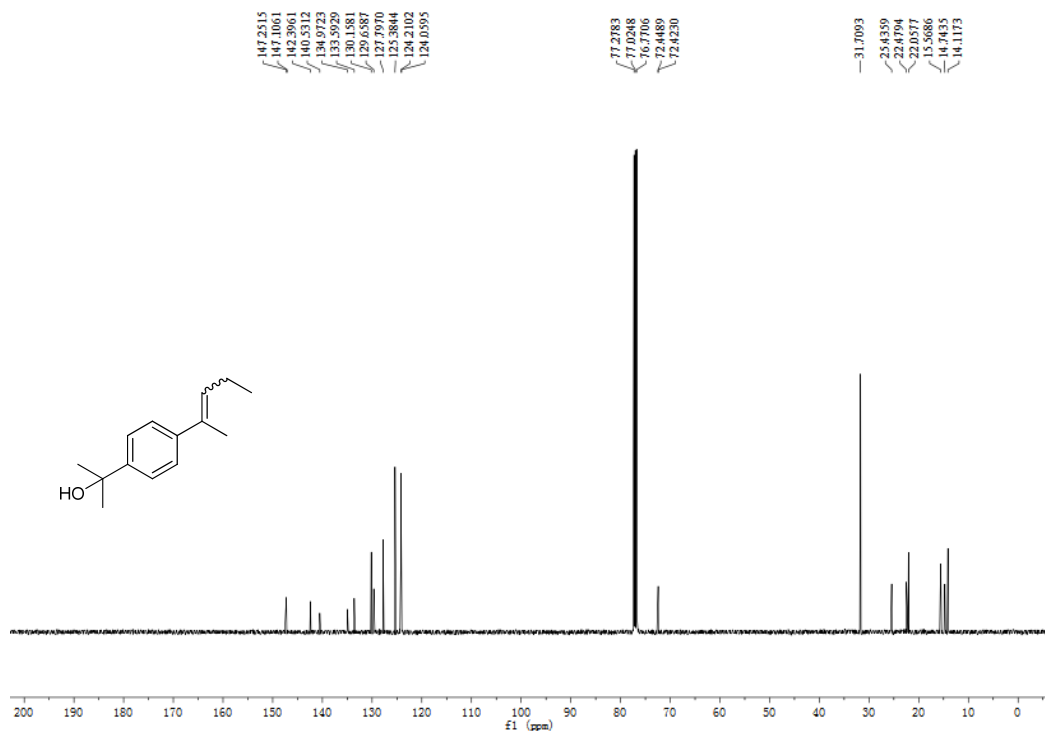

3ik

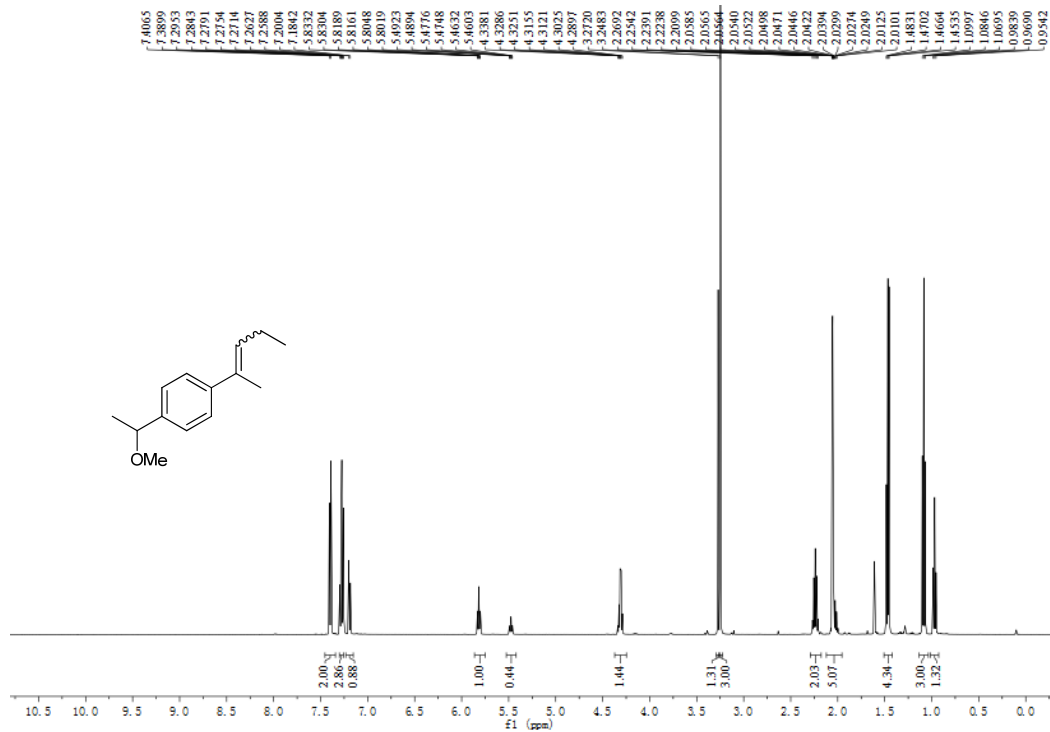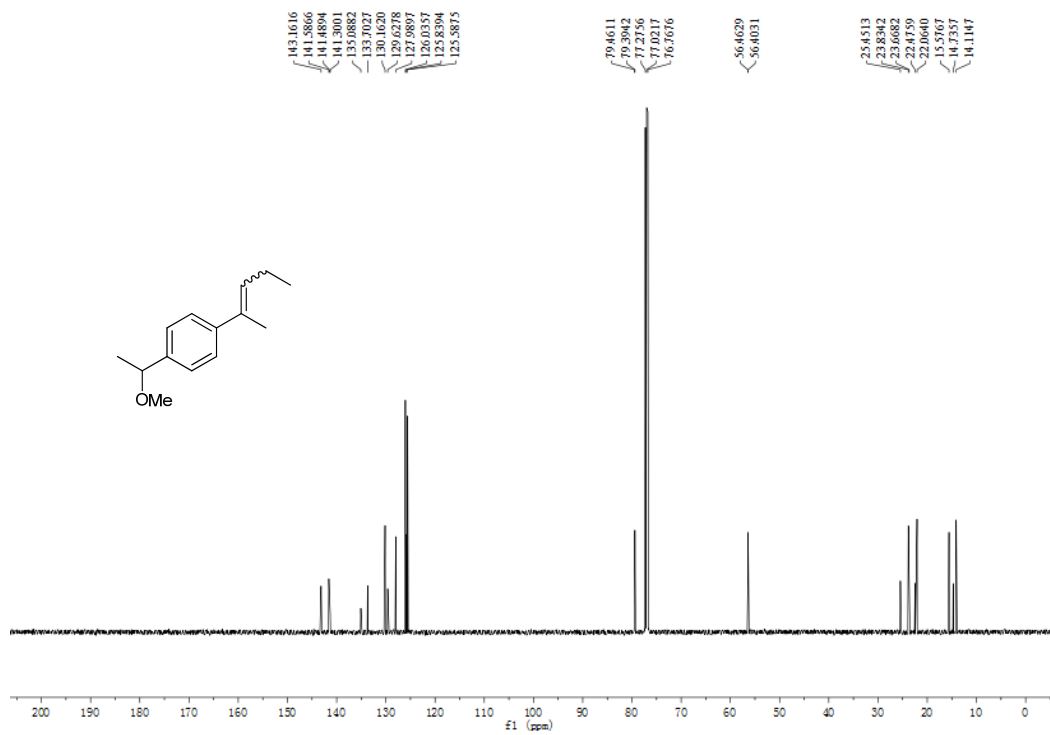

**3il(E)**

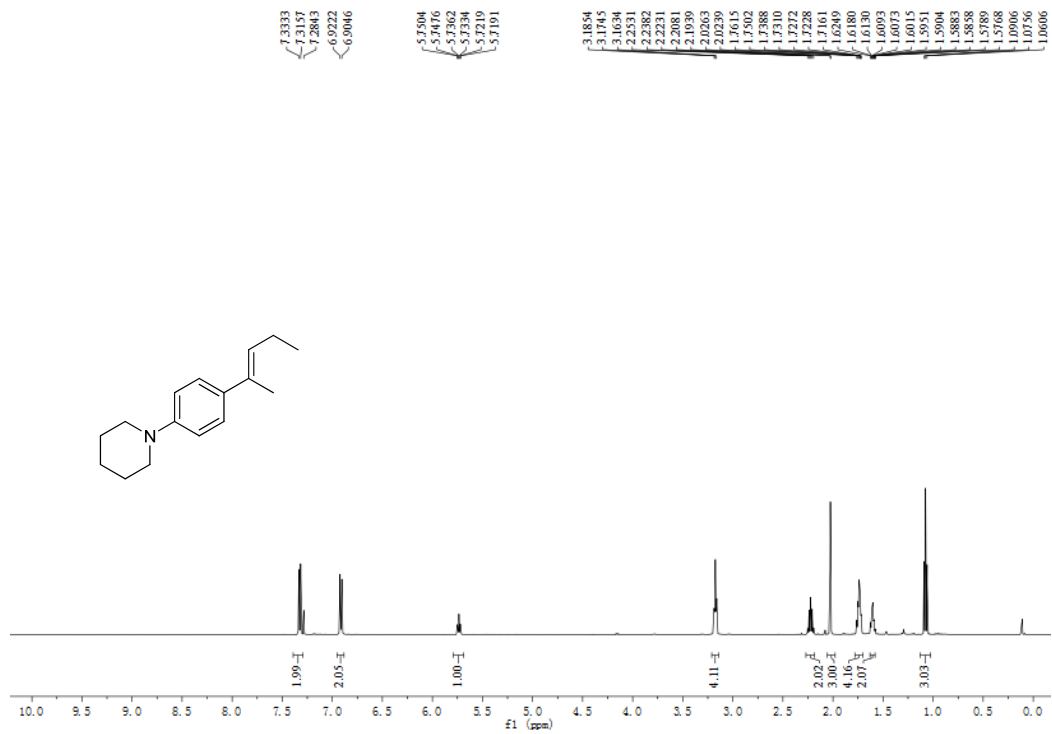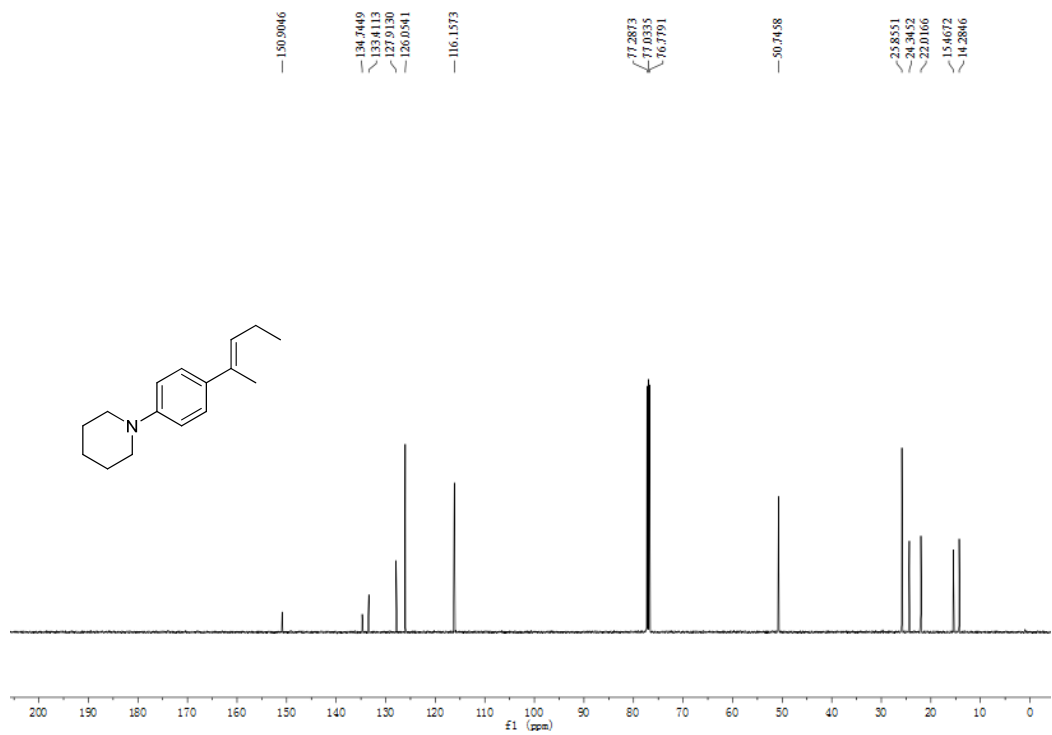

3il(Z)

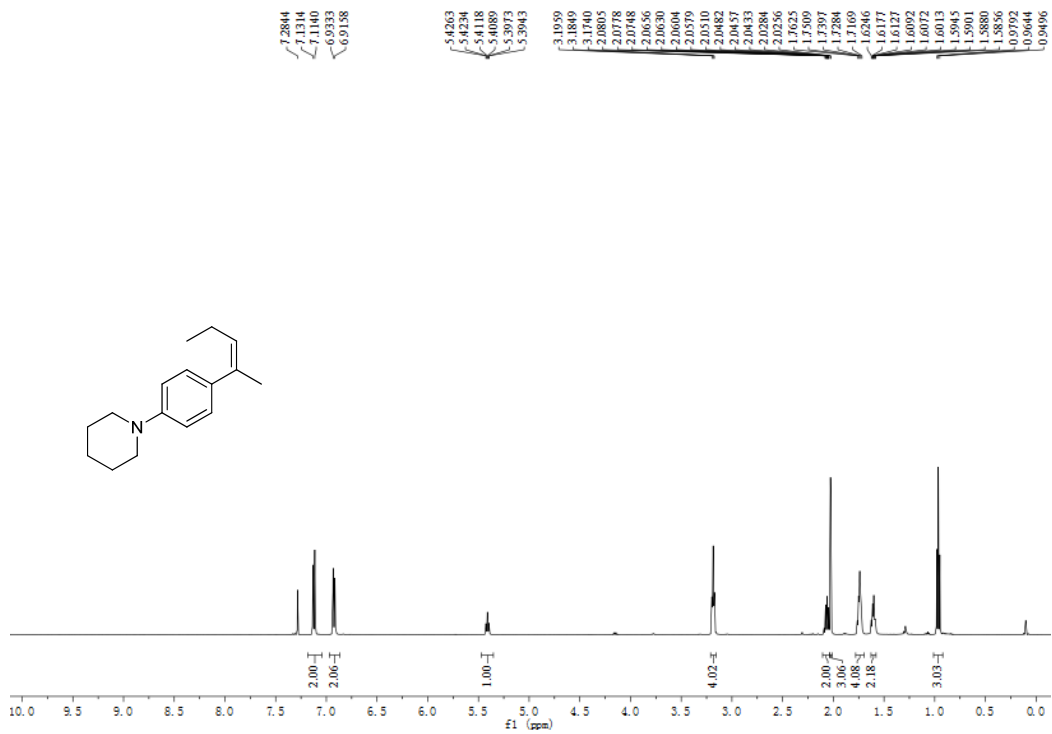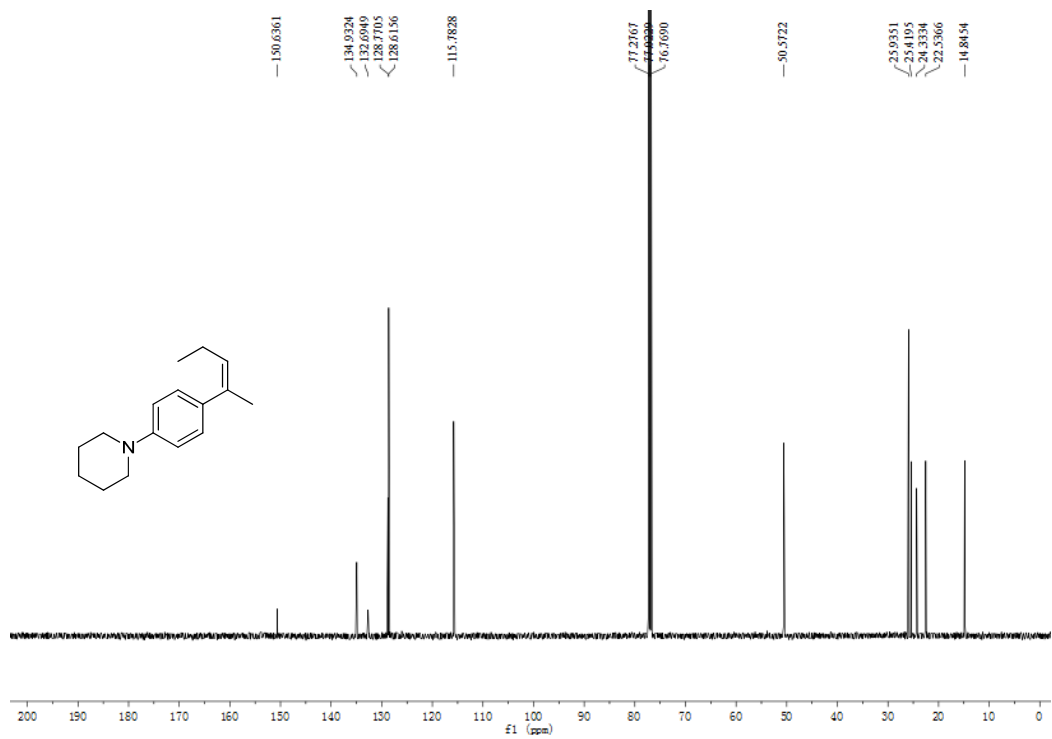

**3im(E)**

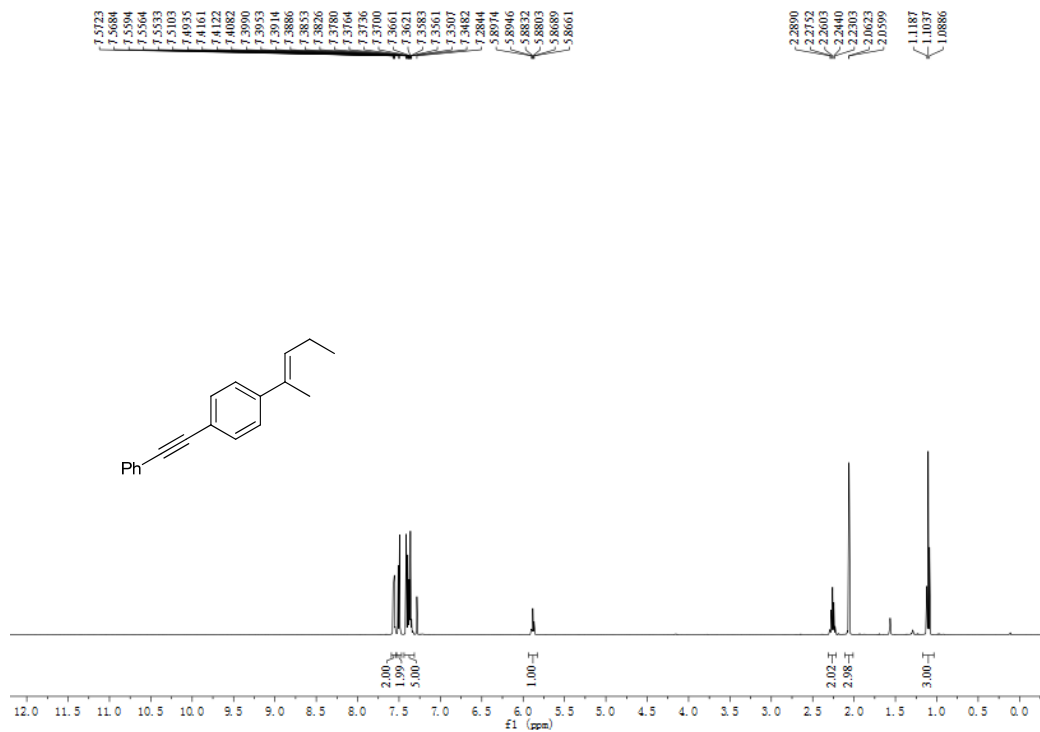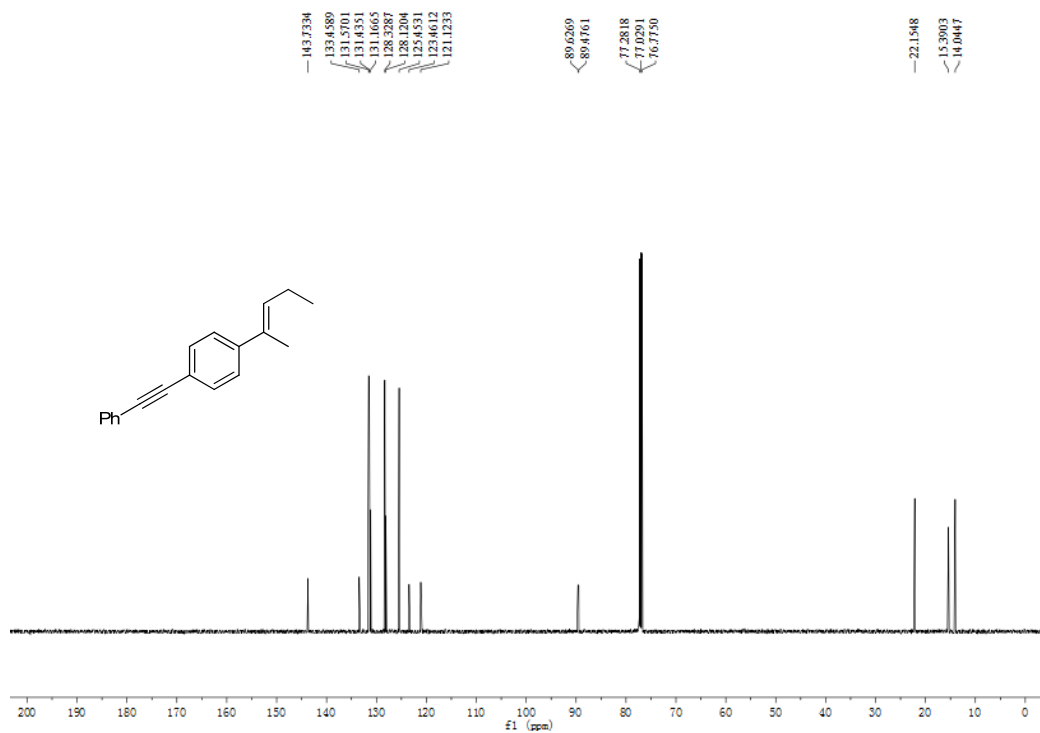

**3im(Z)**

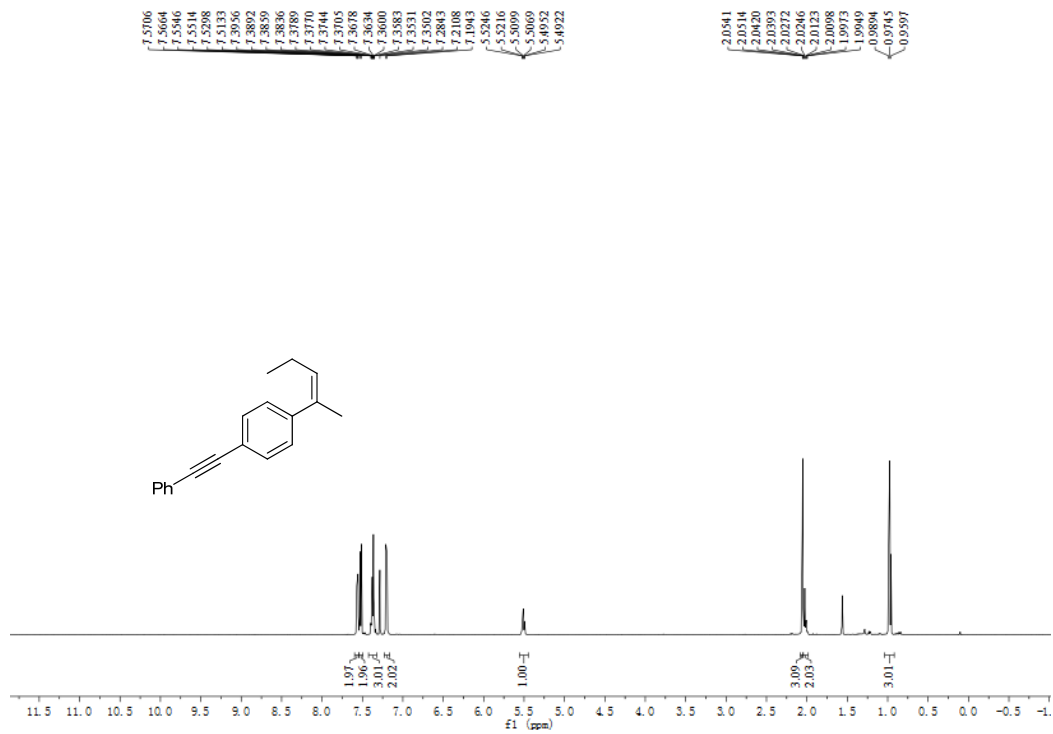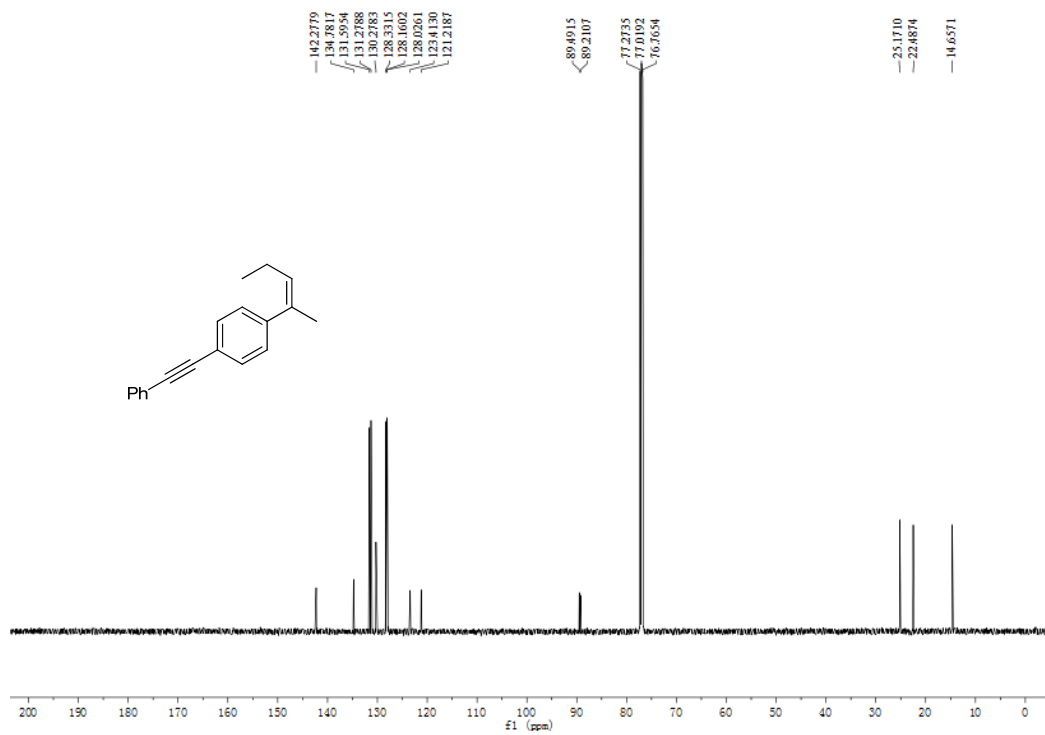



**3in(E)**

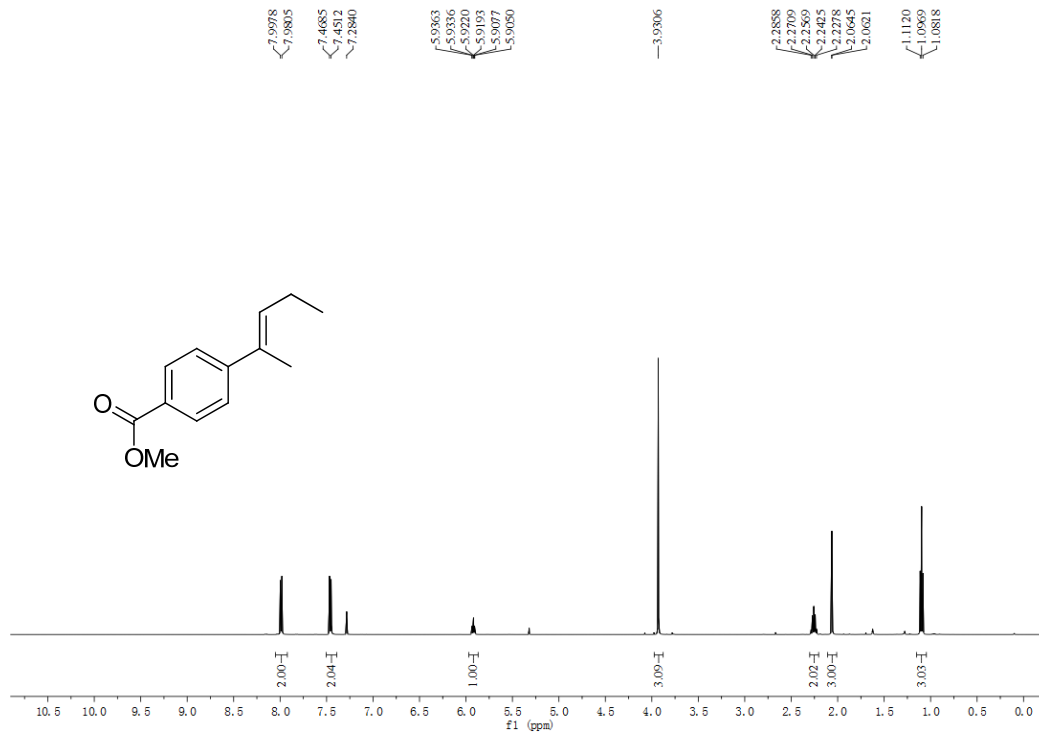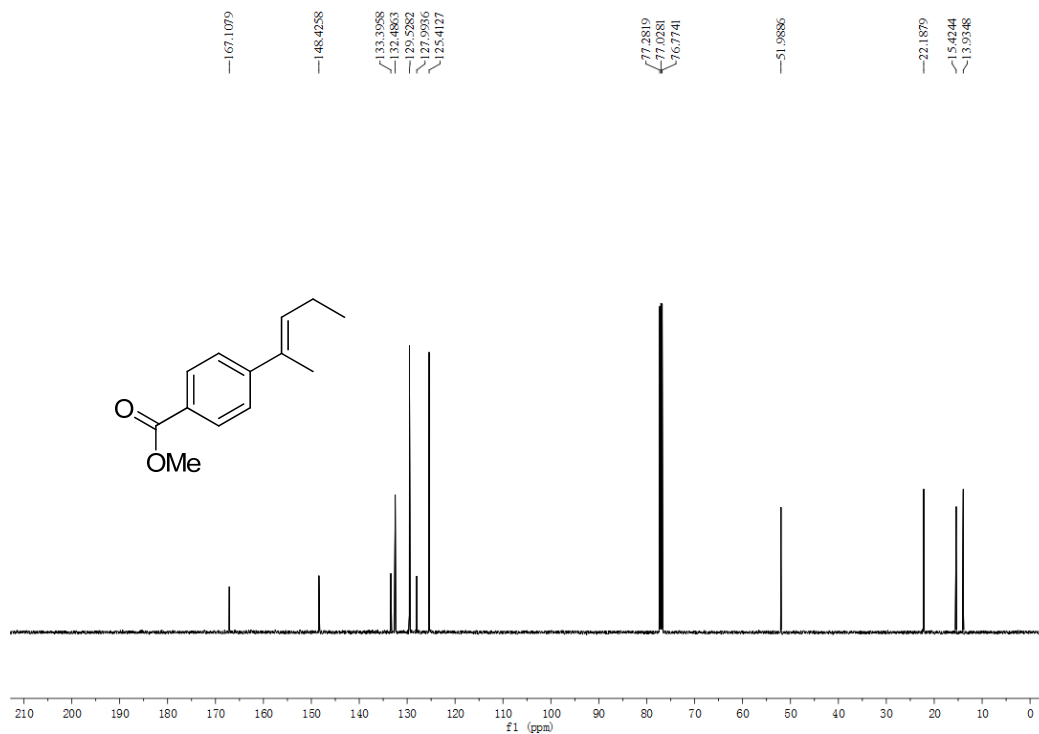

**3in(Z)**

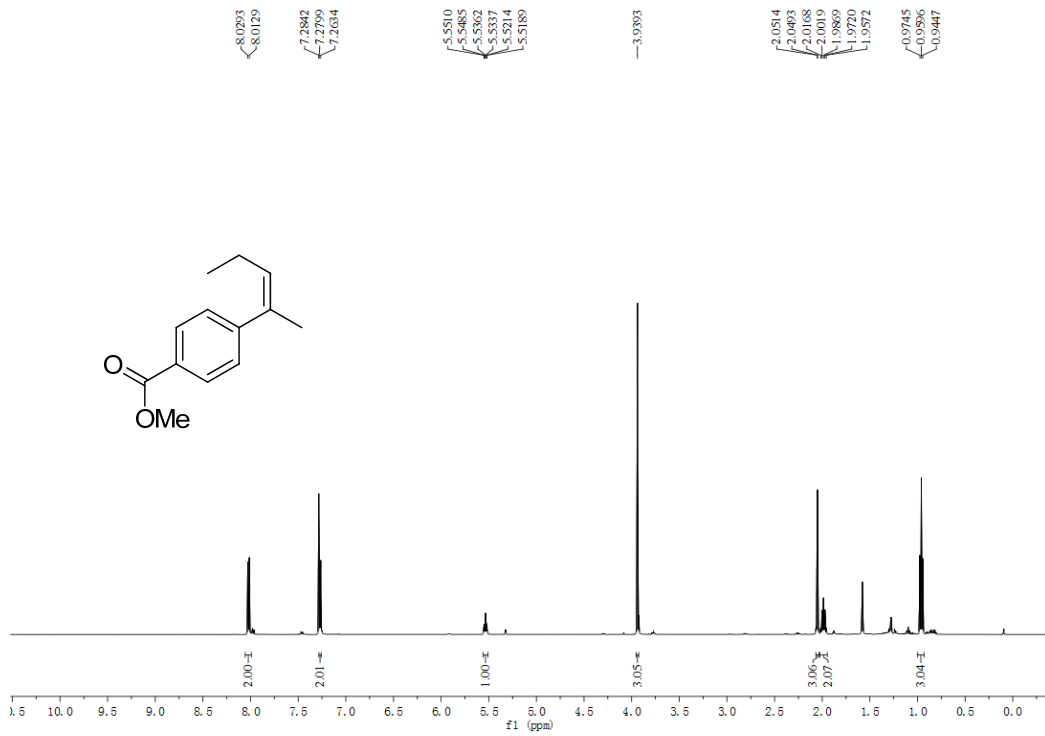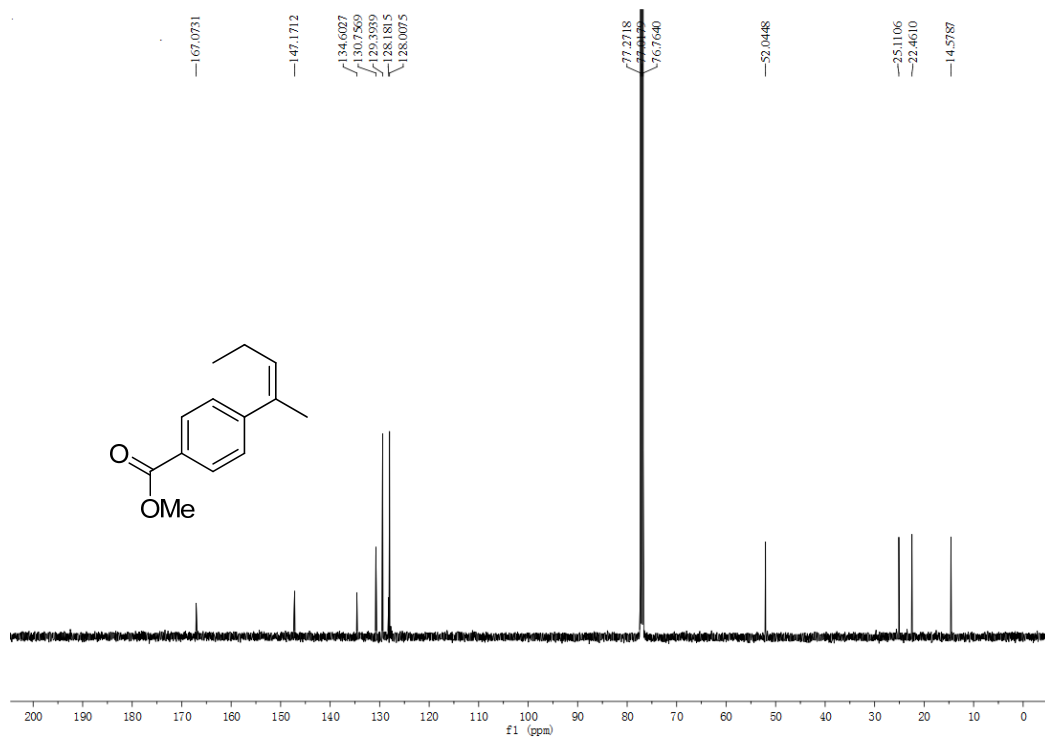

3io

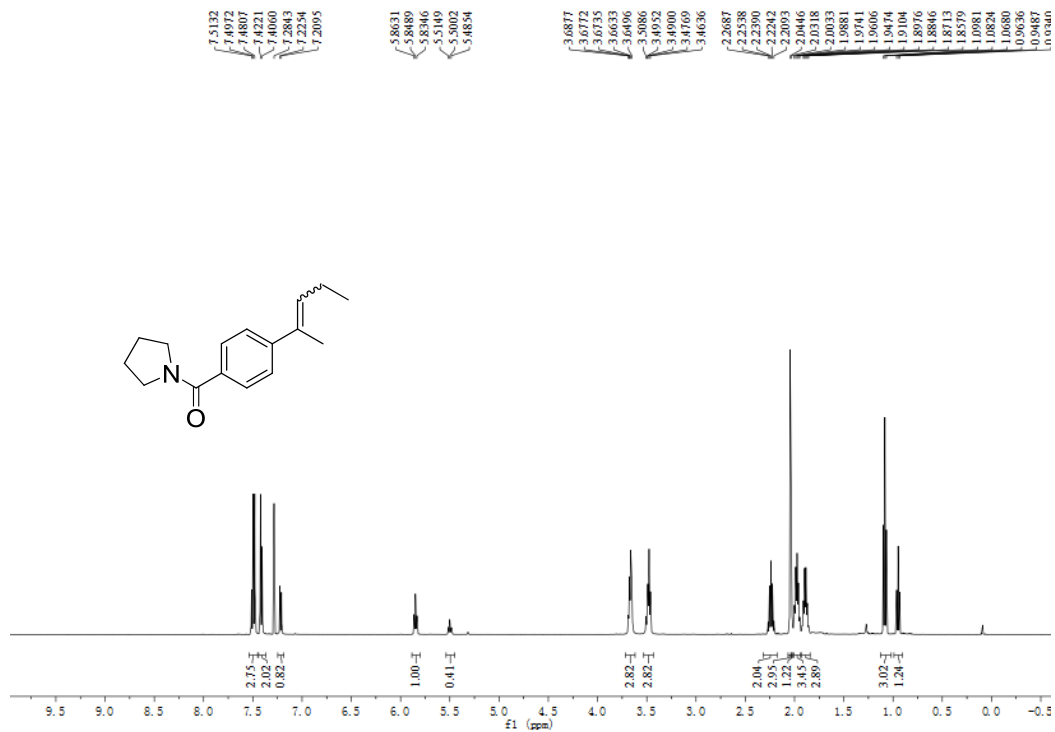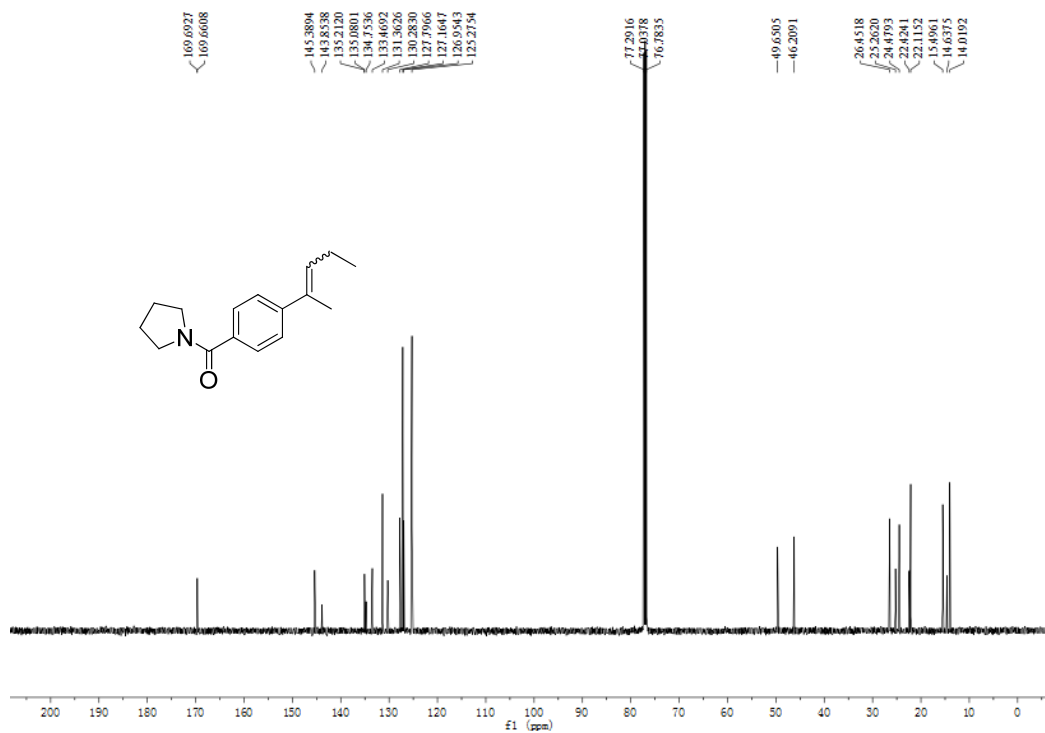

# 3ip(E)

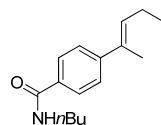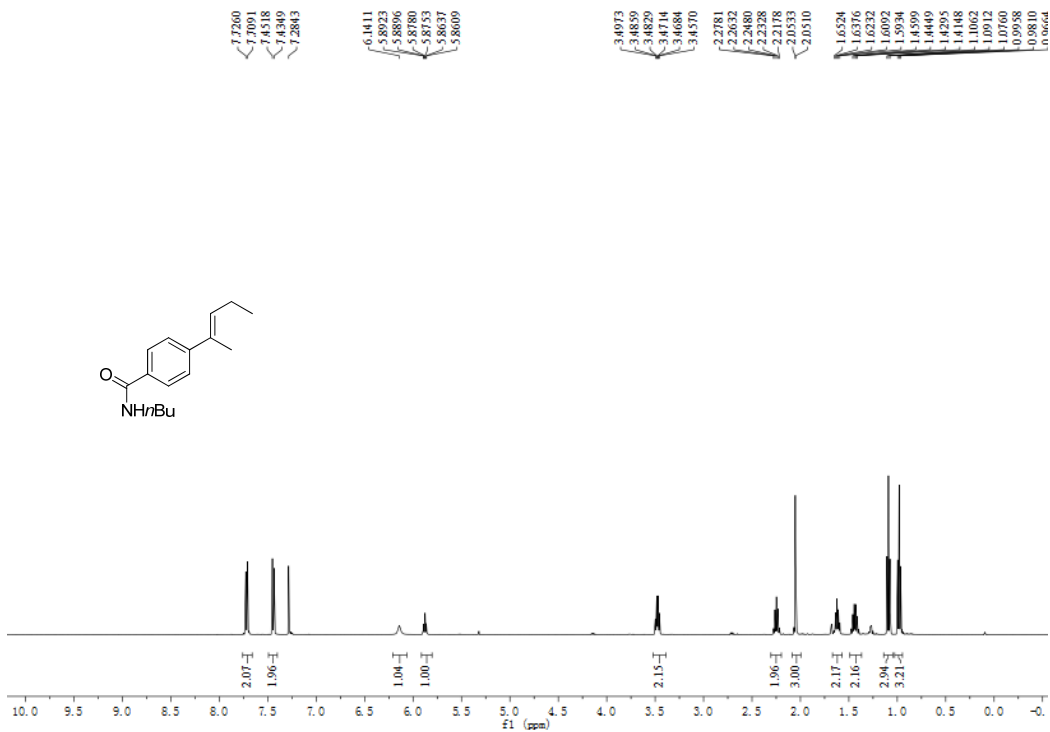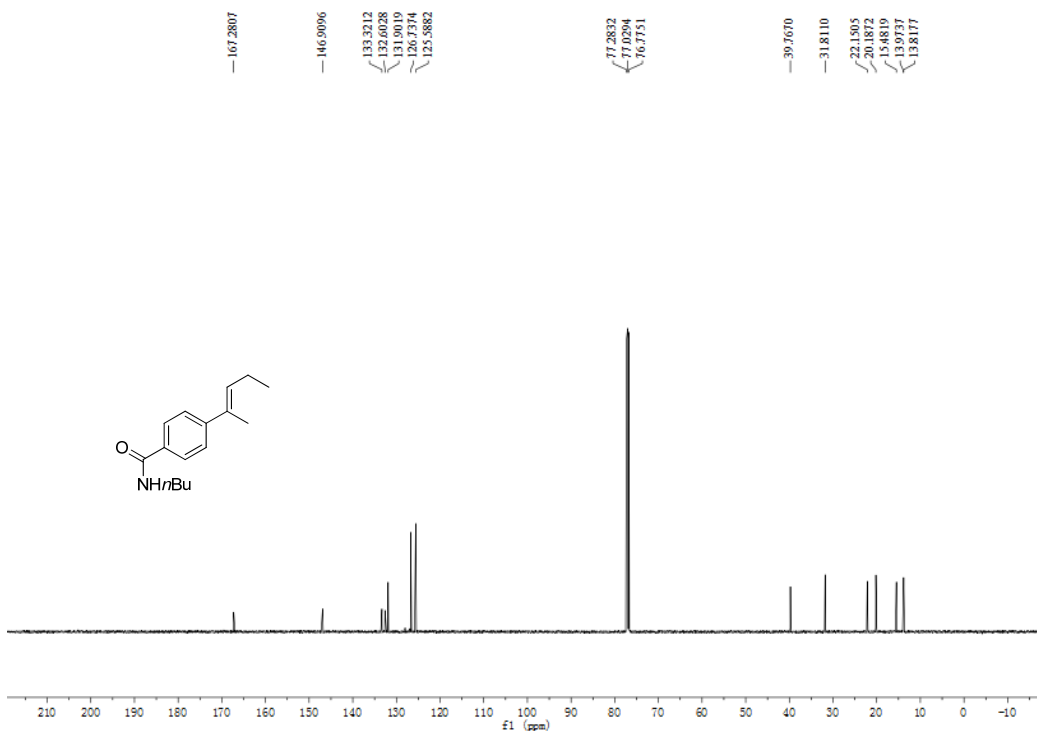

# 3ip(Z)

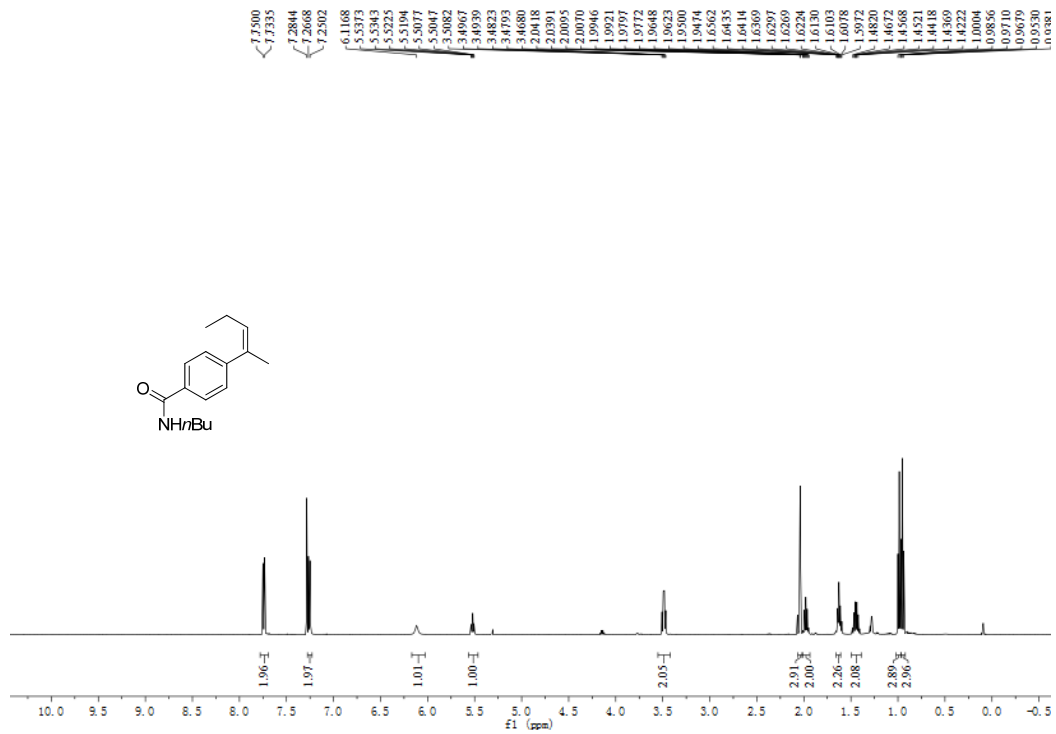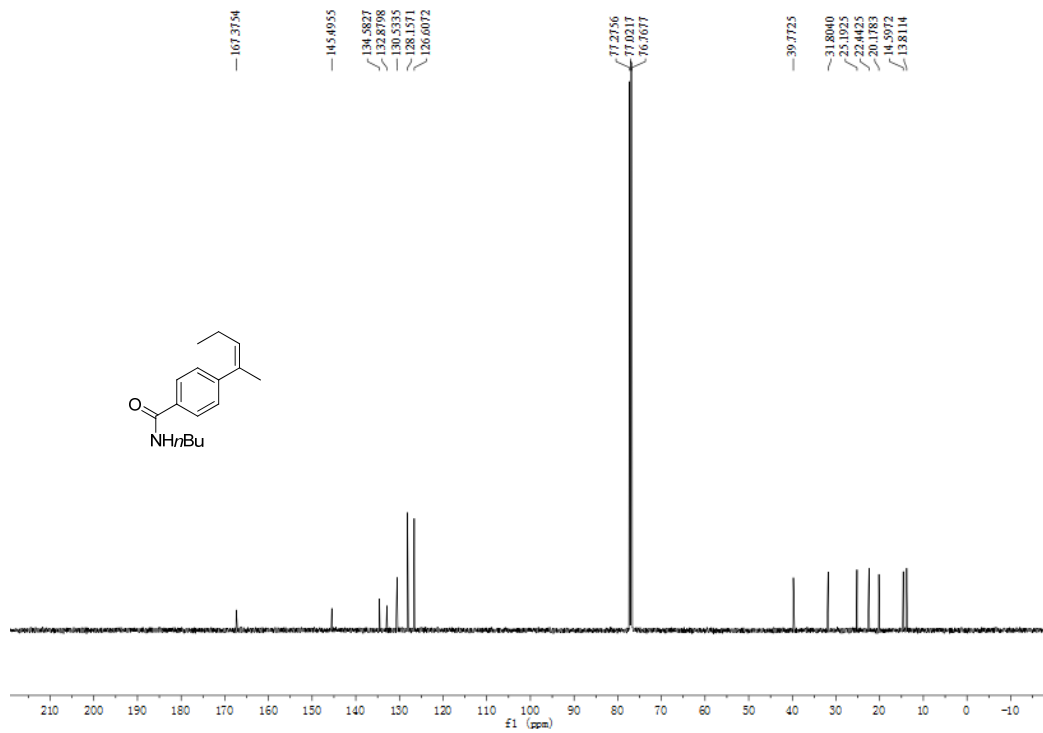

### 3j(E)

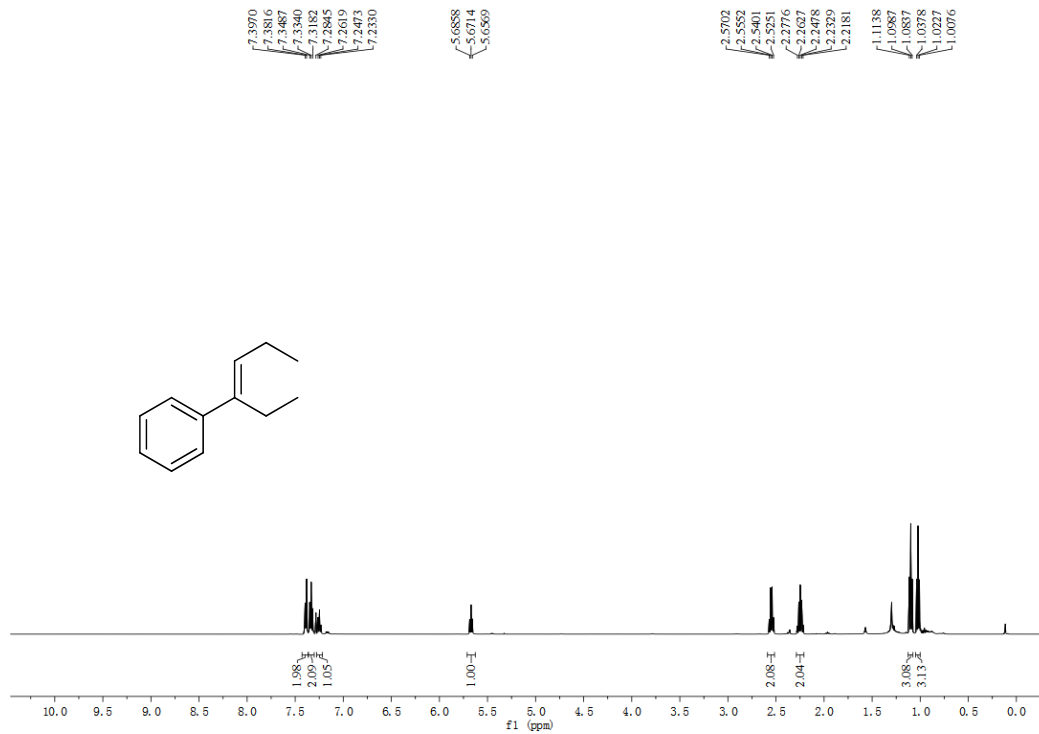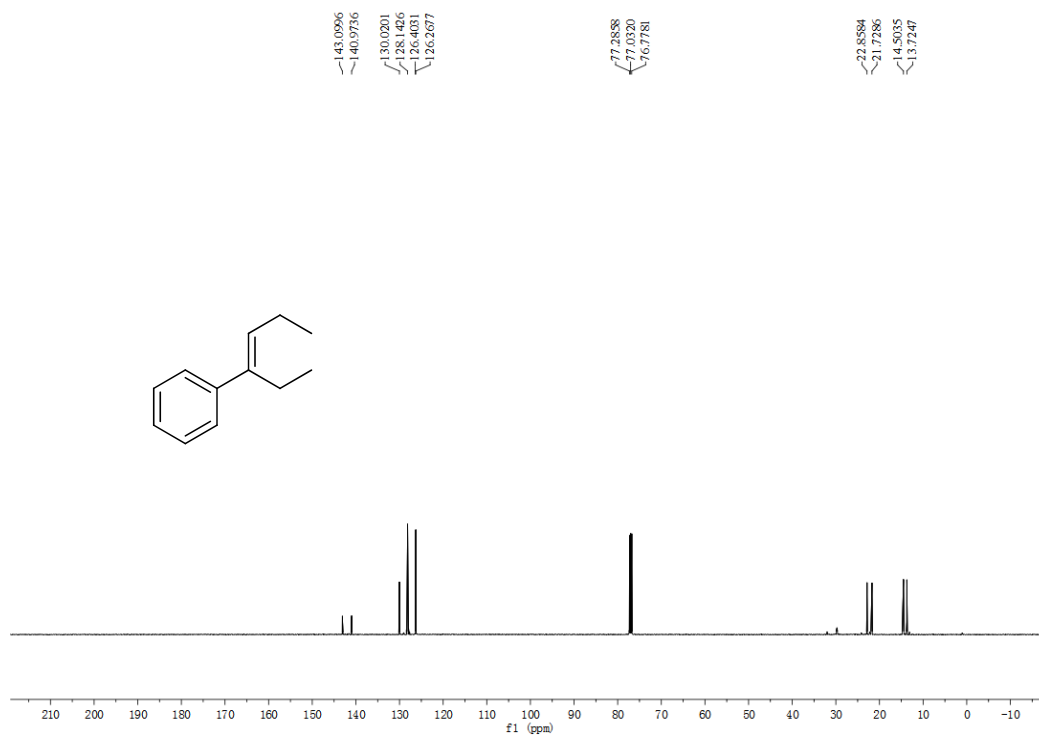

3j(Z)

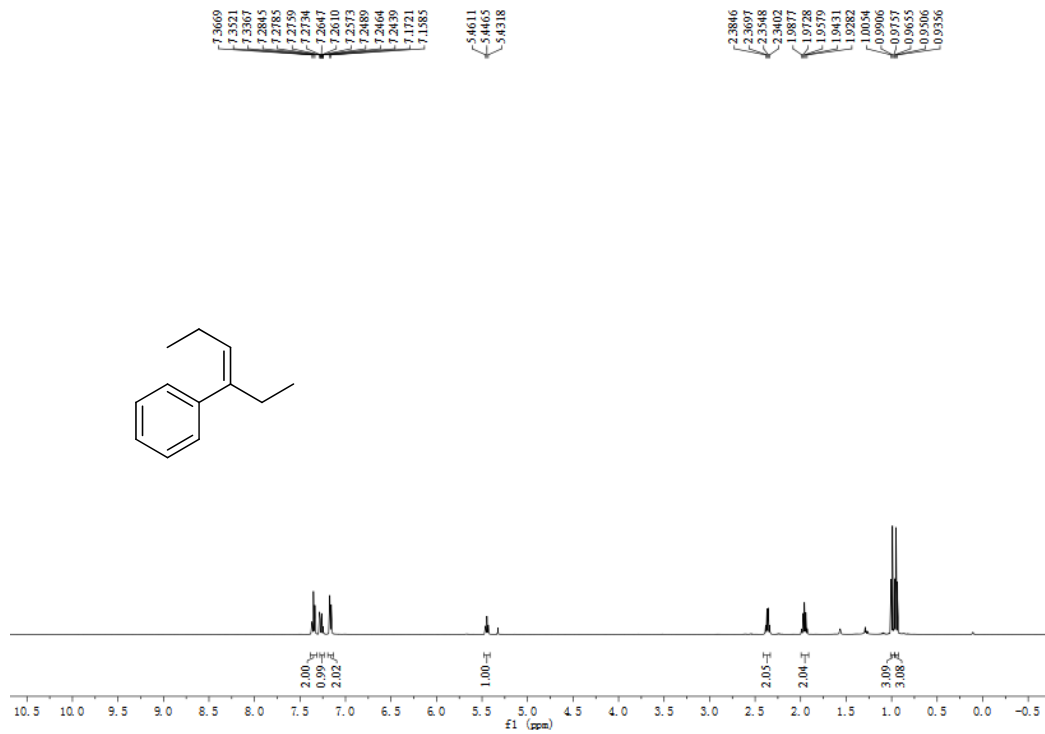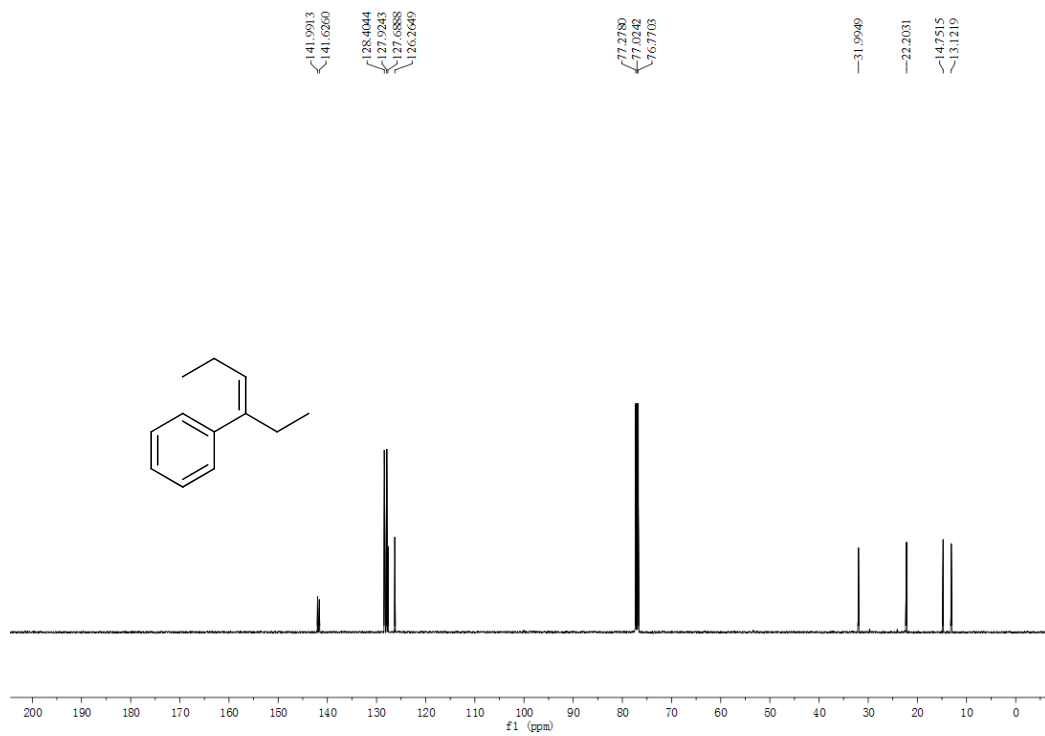

**3k(E)**

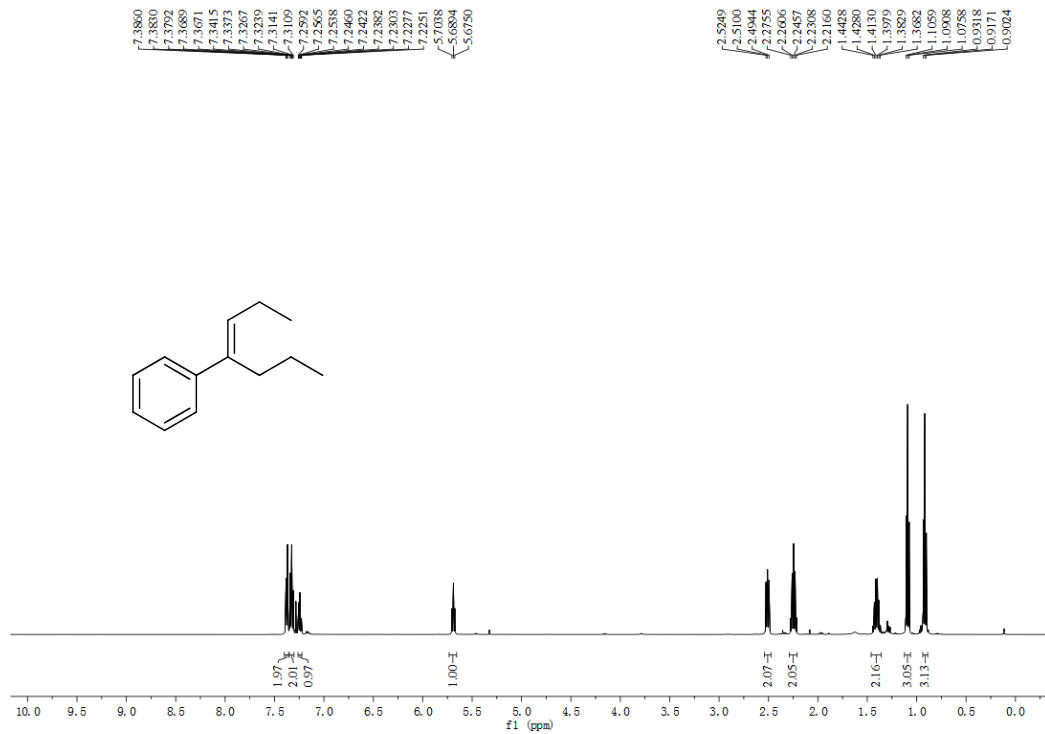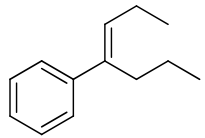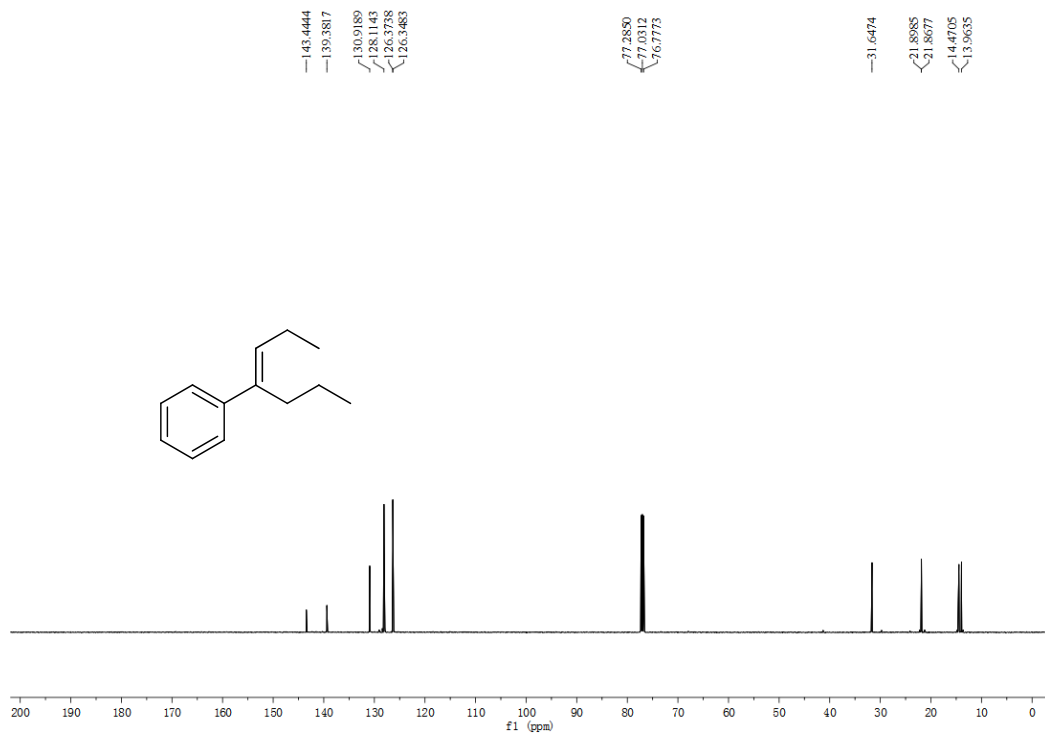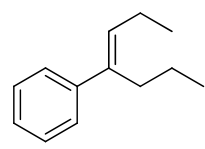



3k(Z)

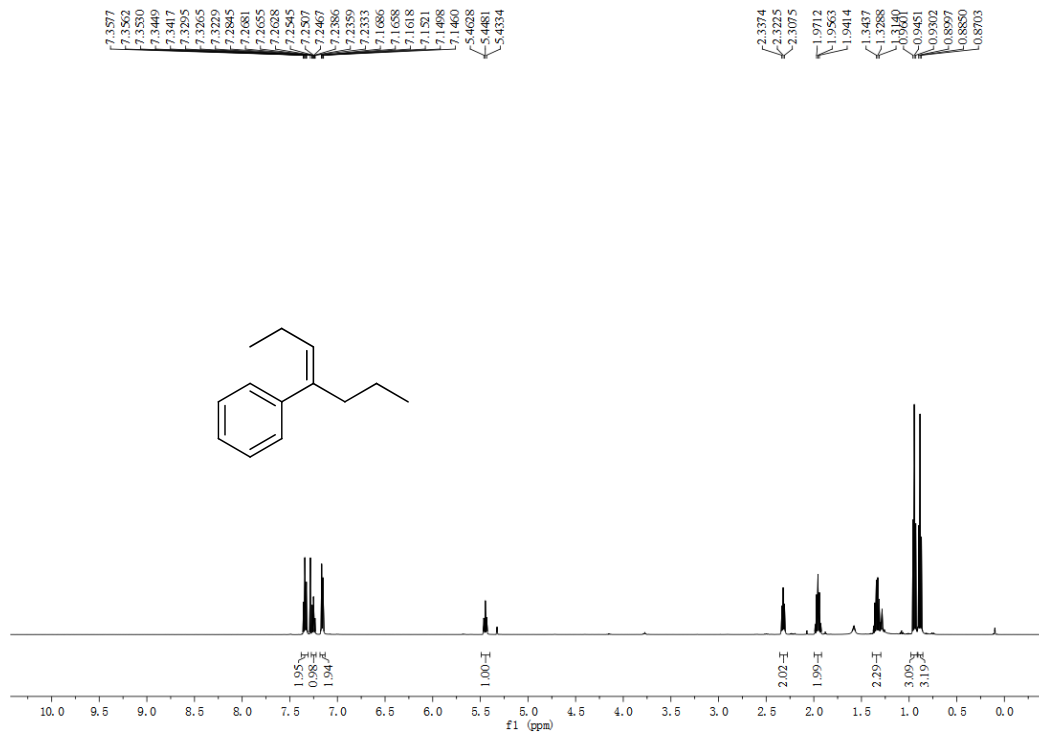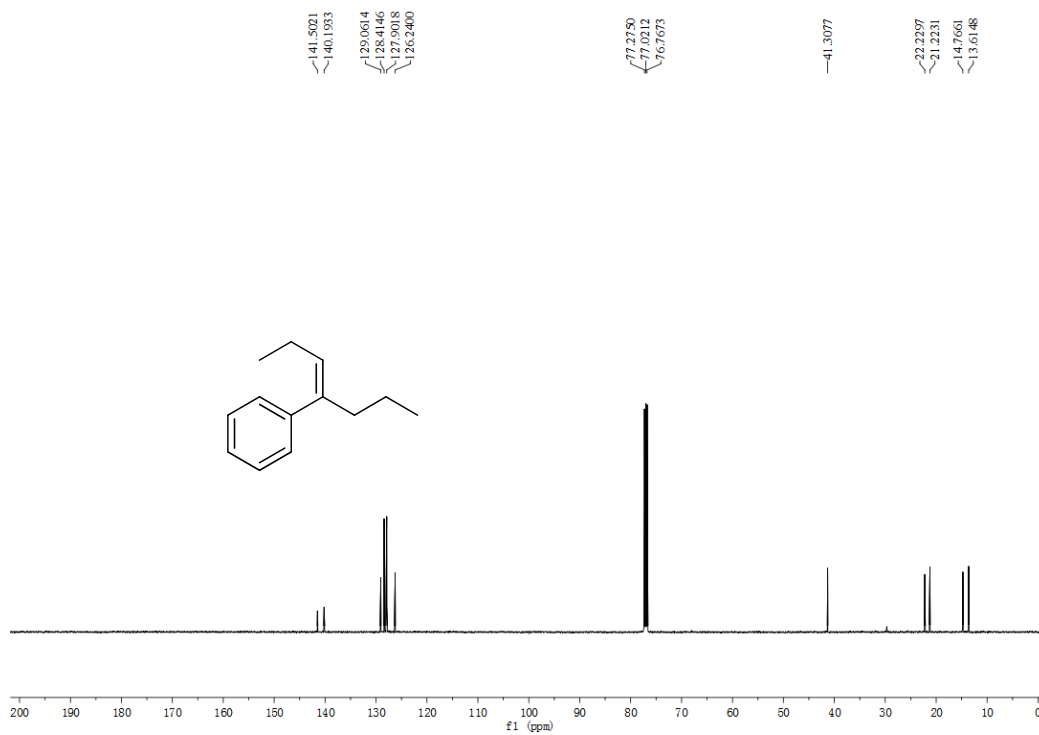

**31(E)**

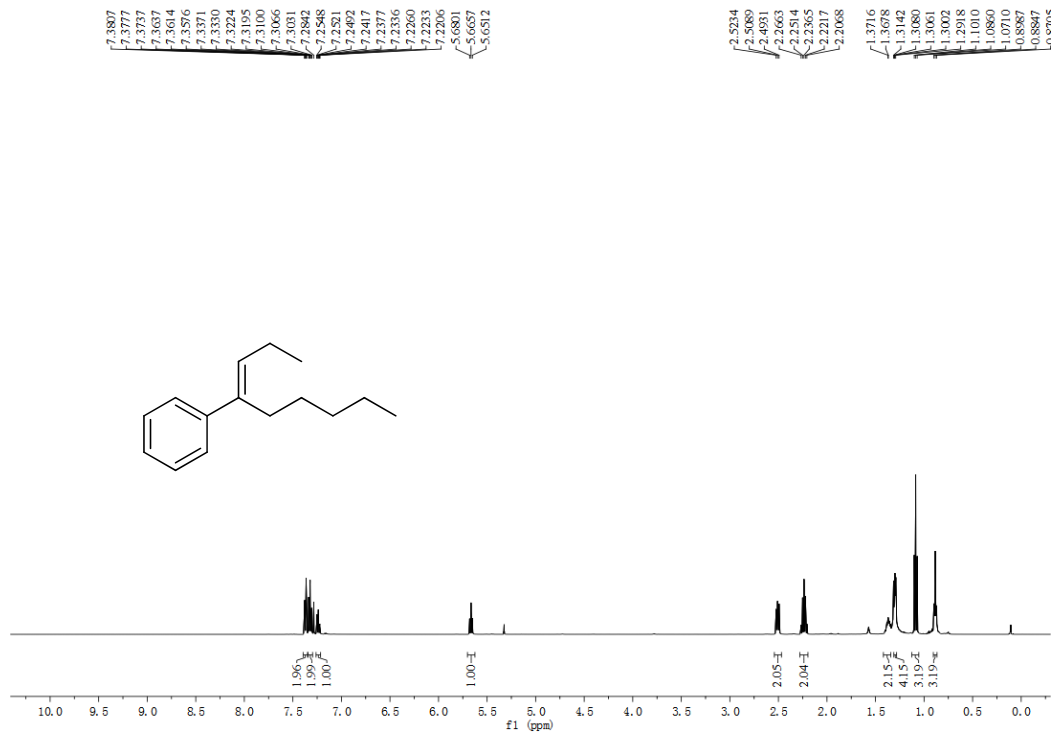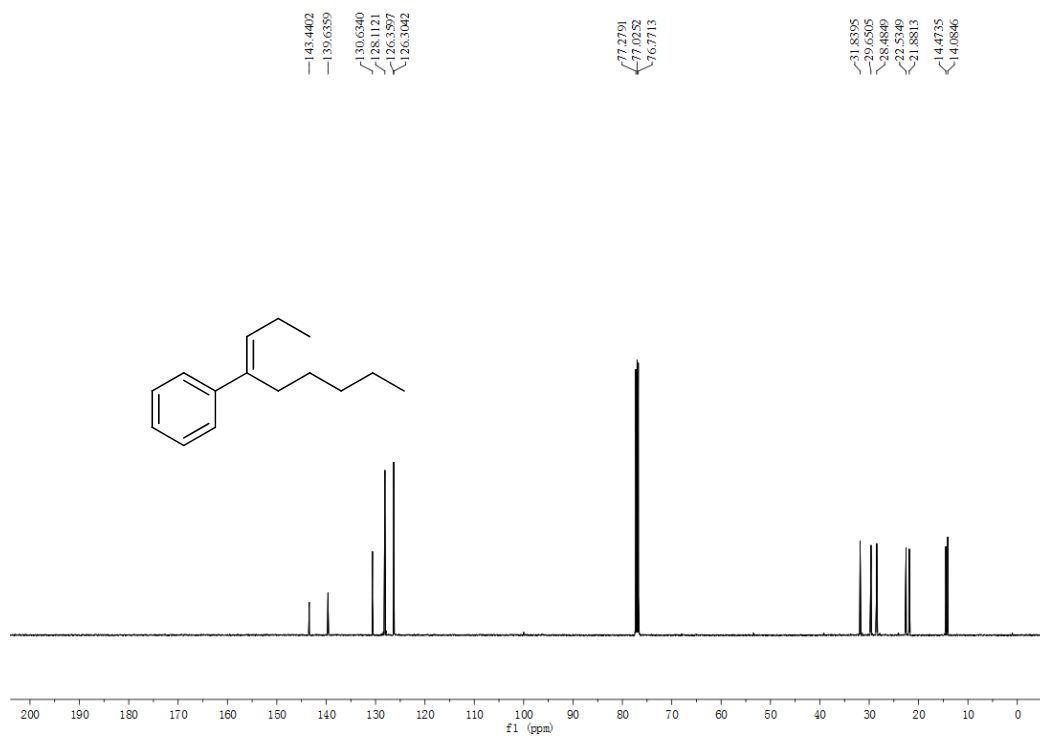

31(Z)

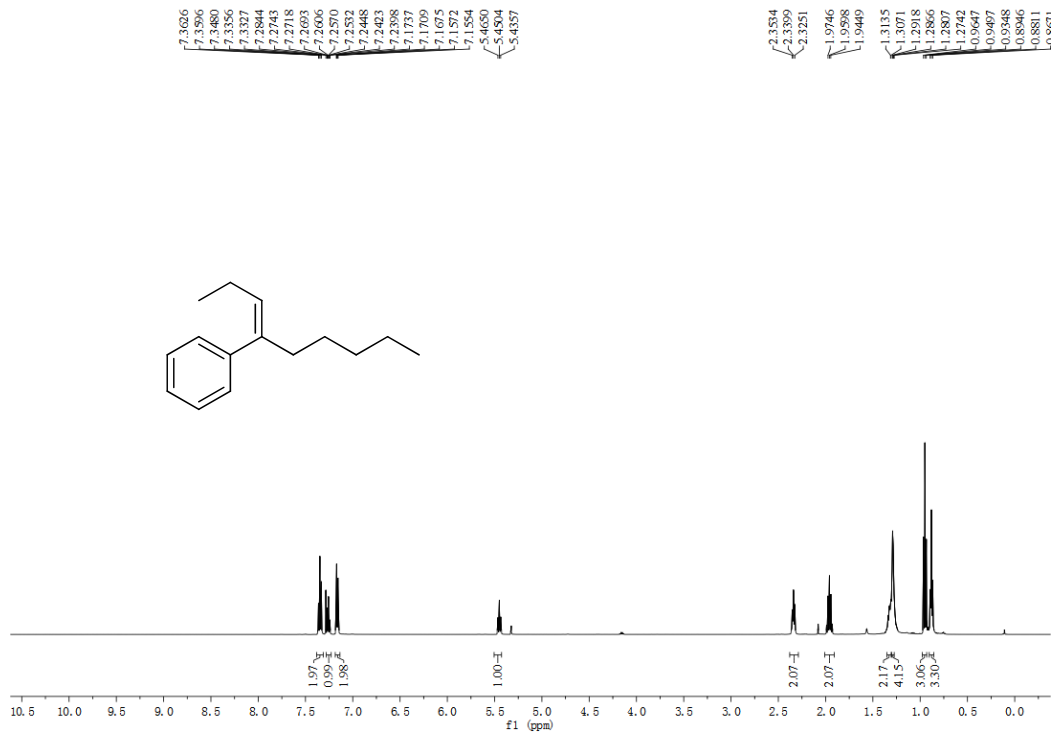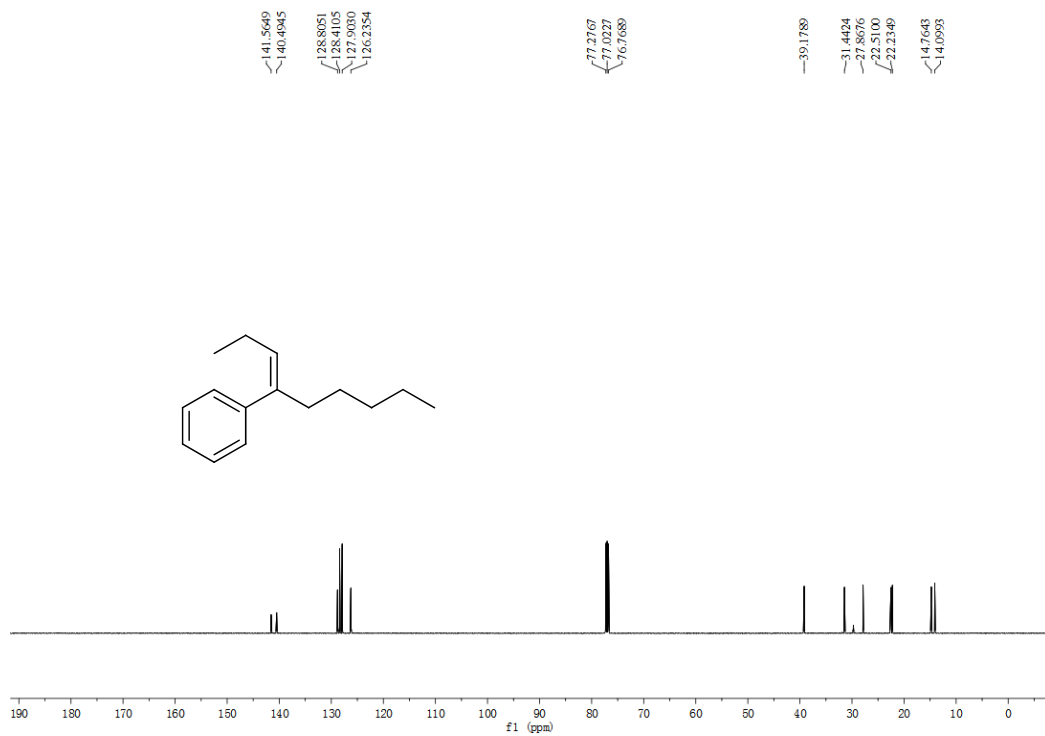

3m

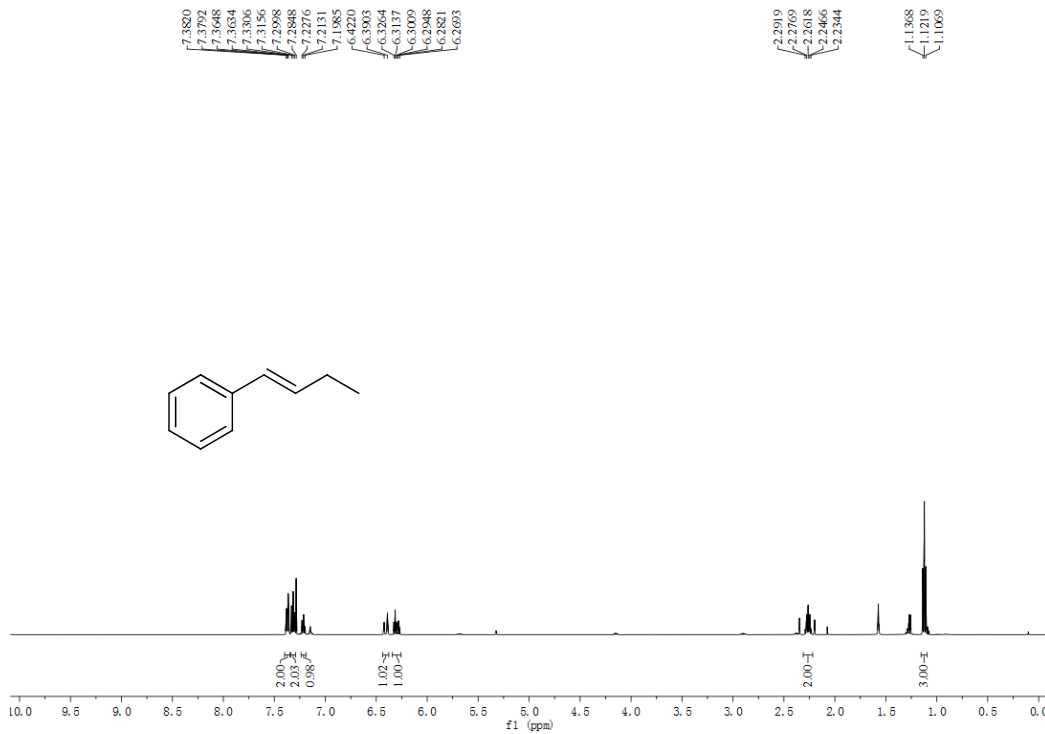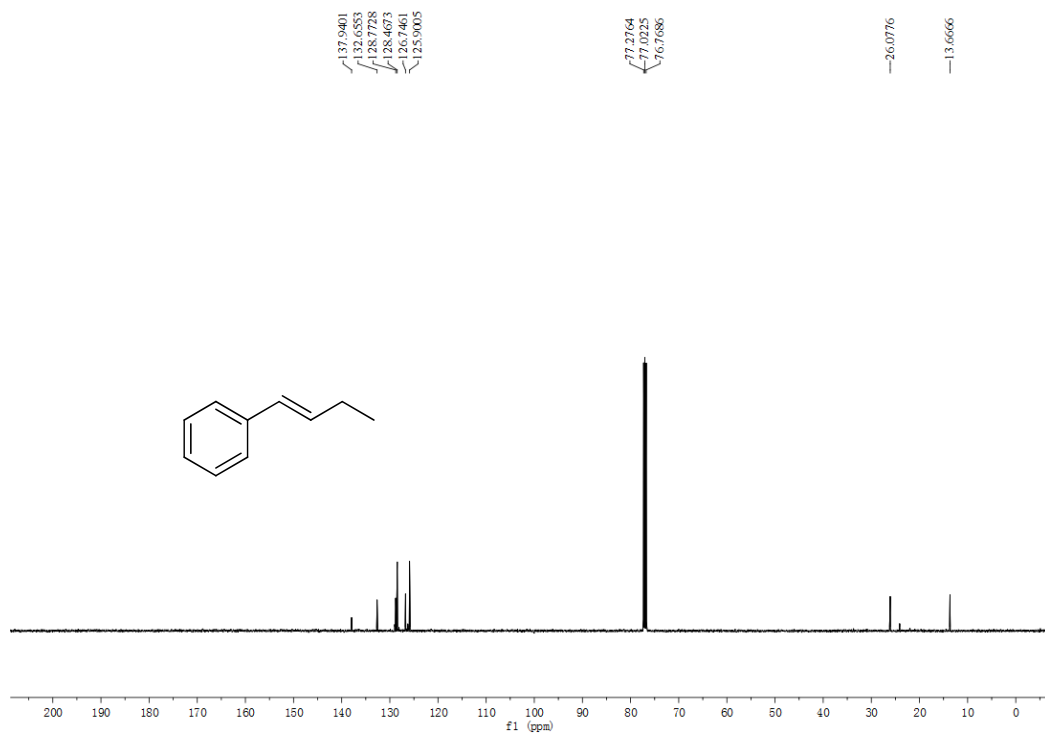

30

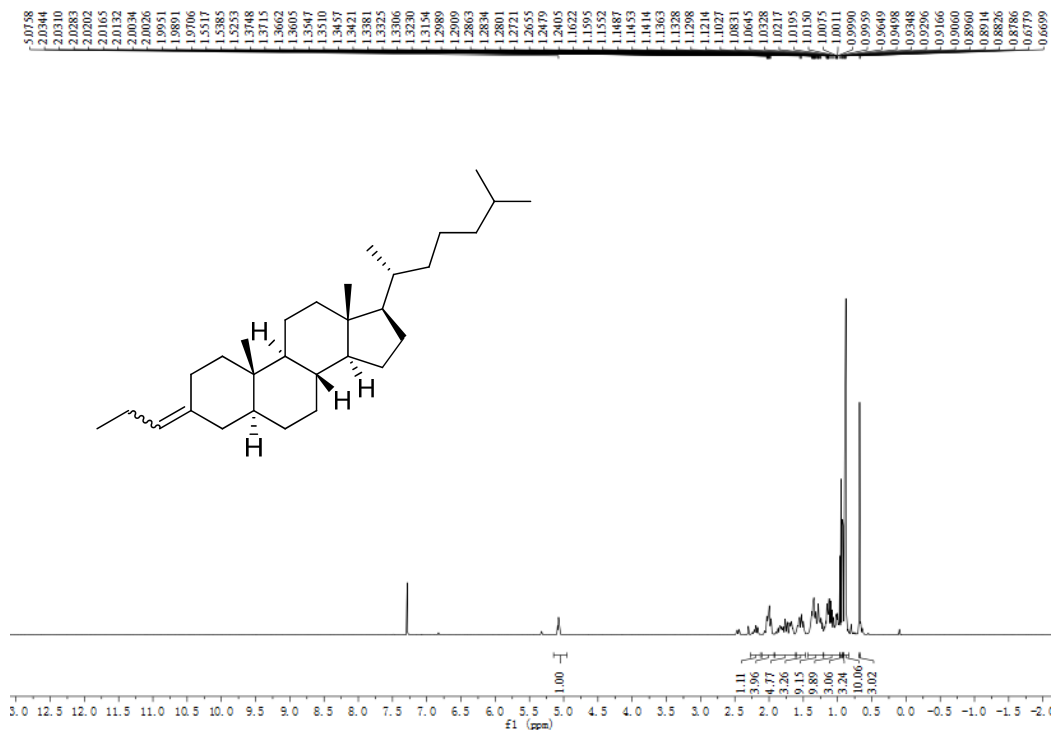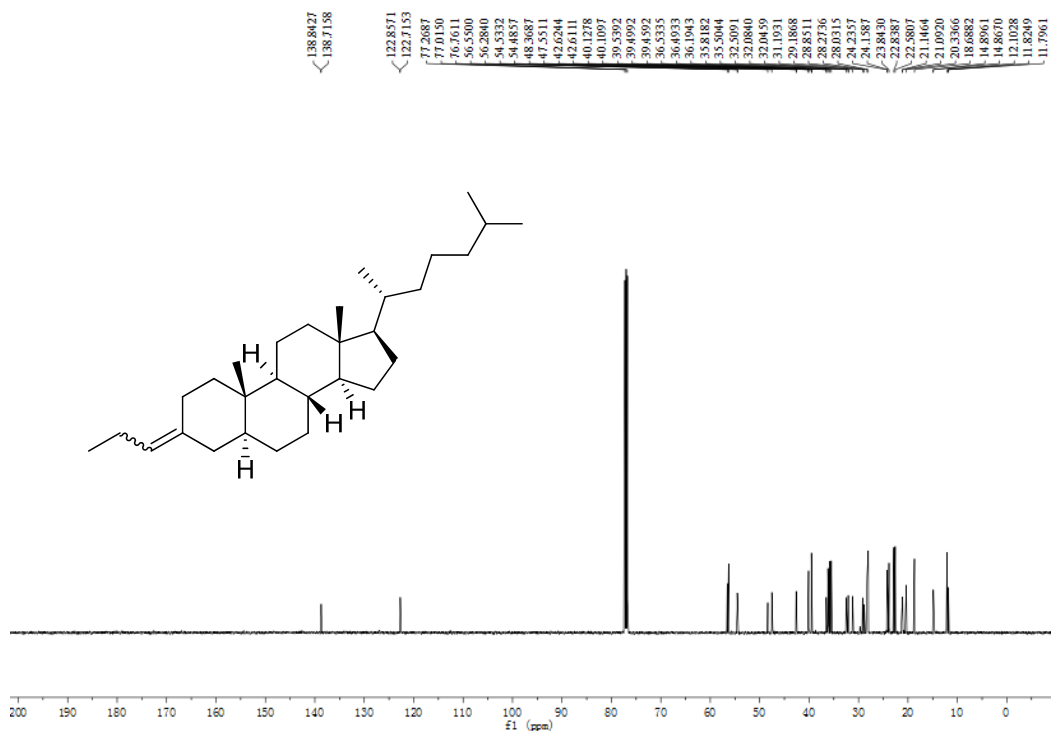

3p

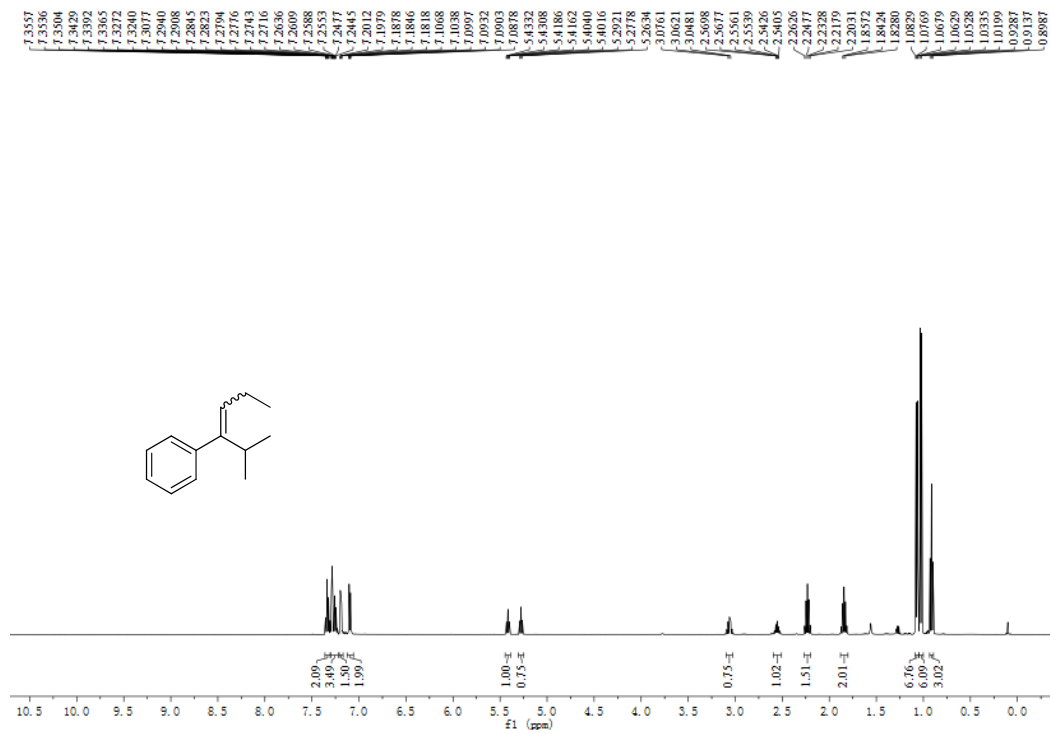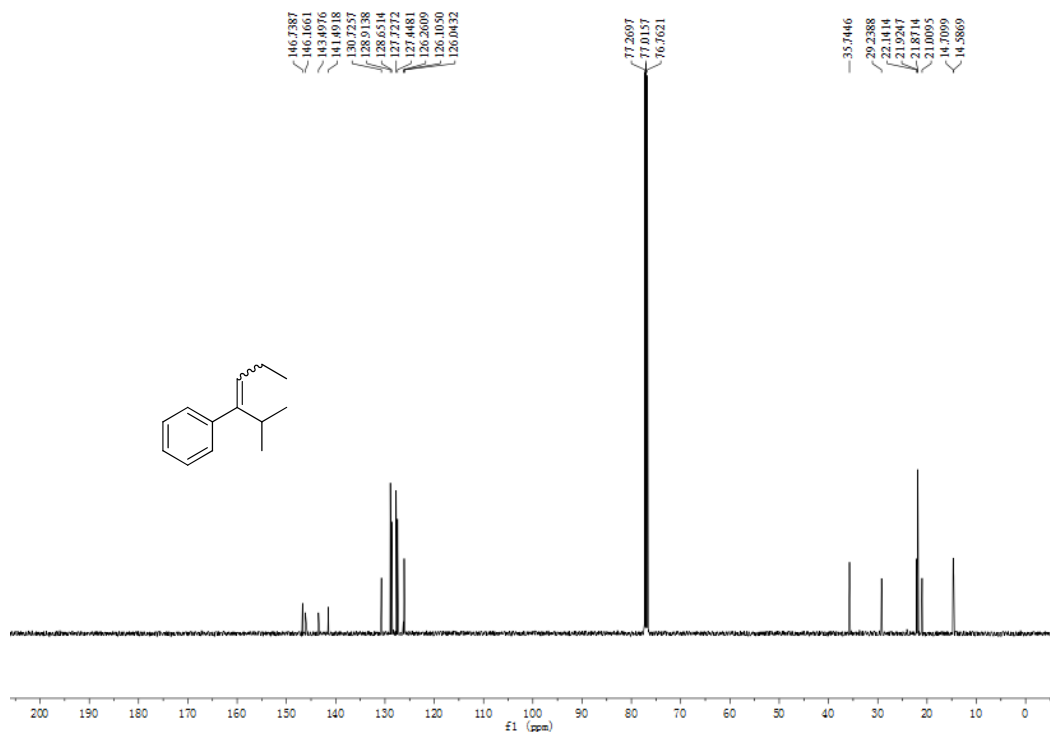

3q

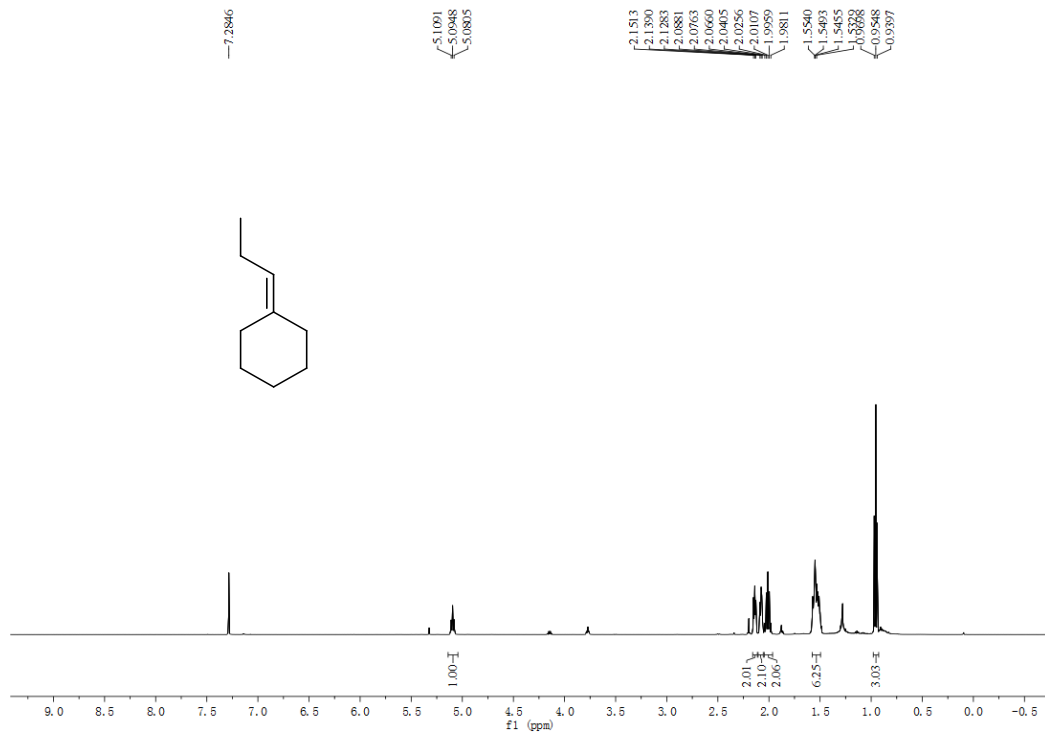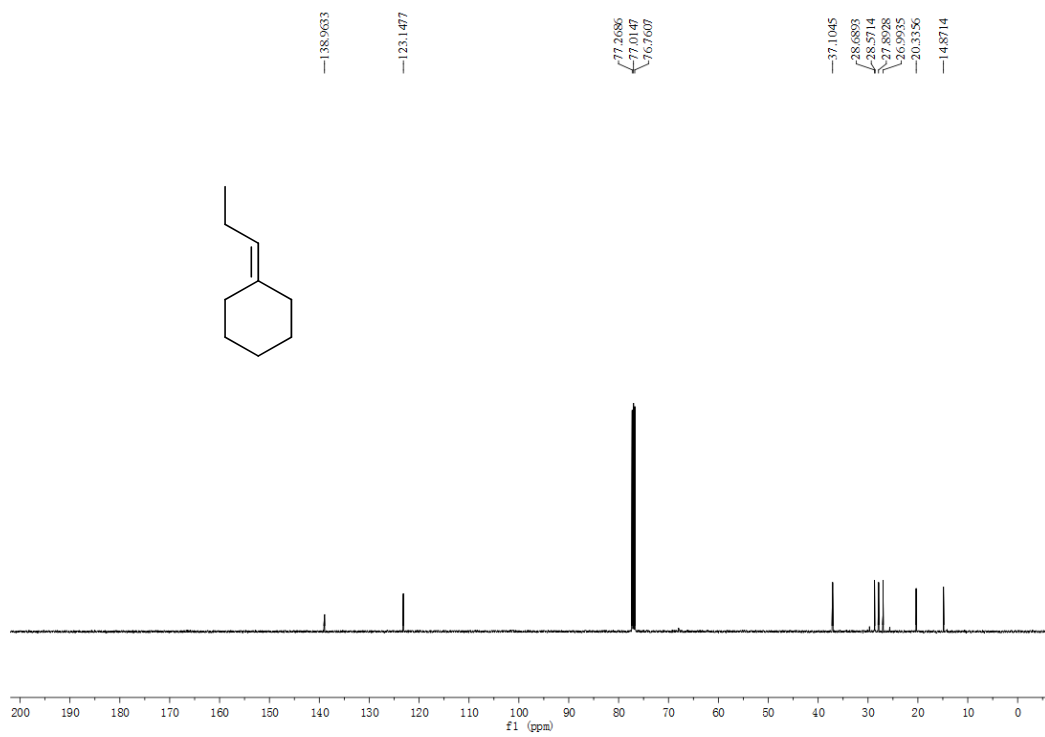

3r

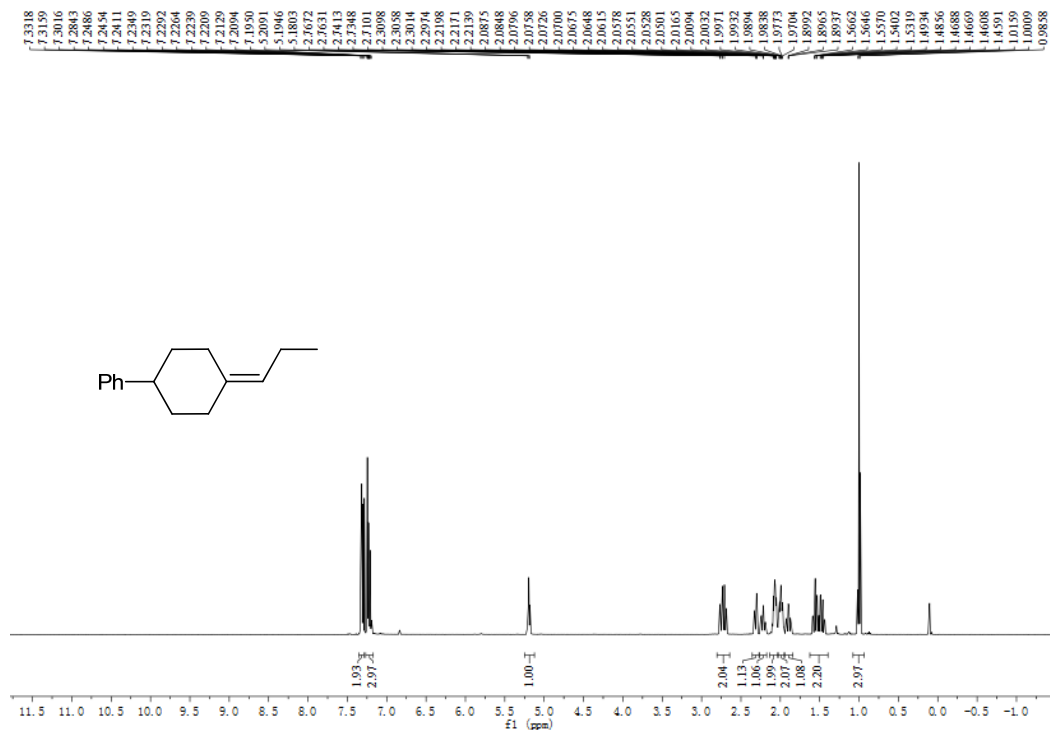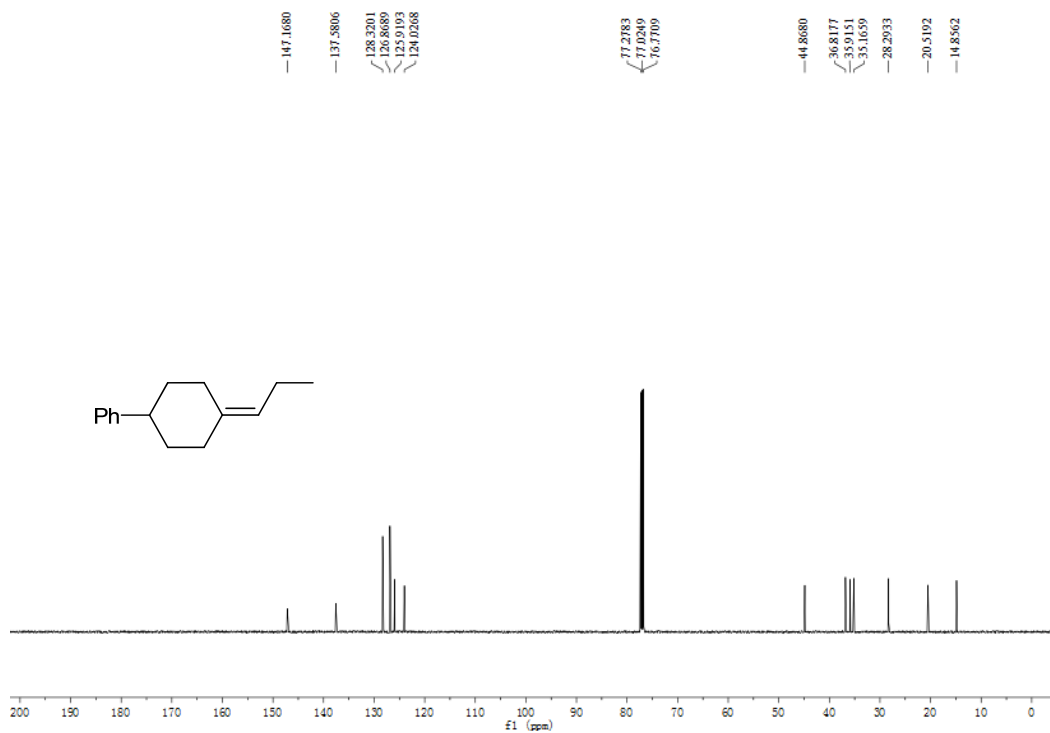



4a

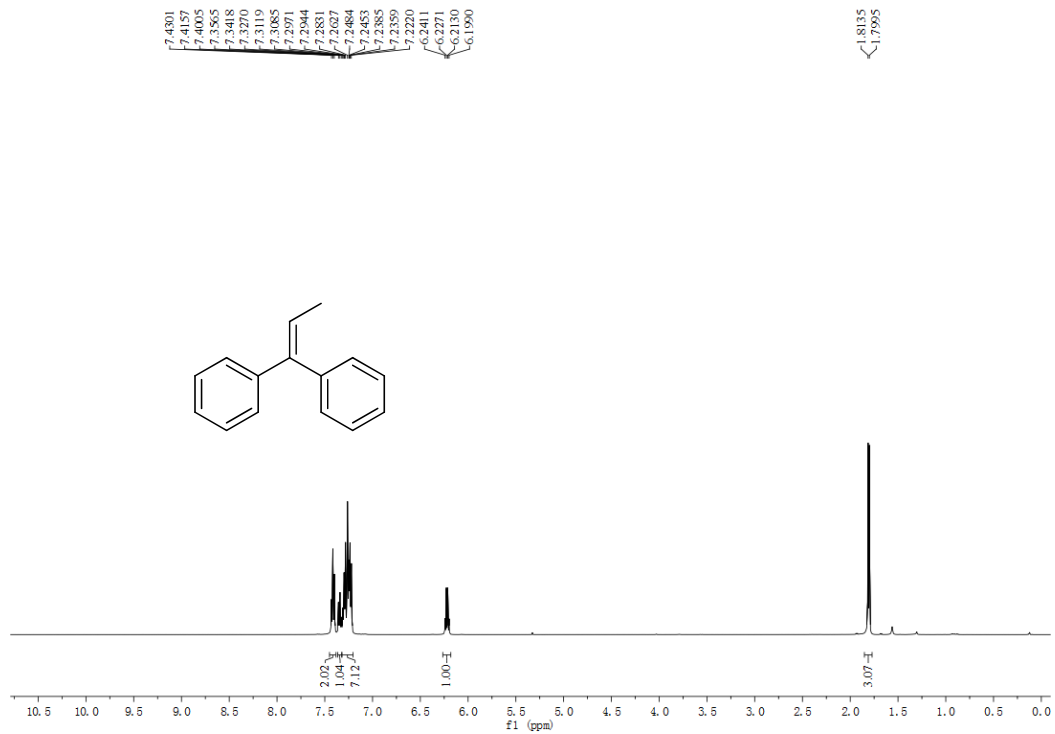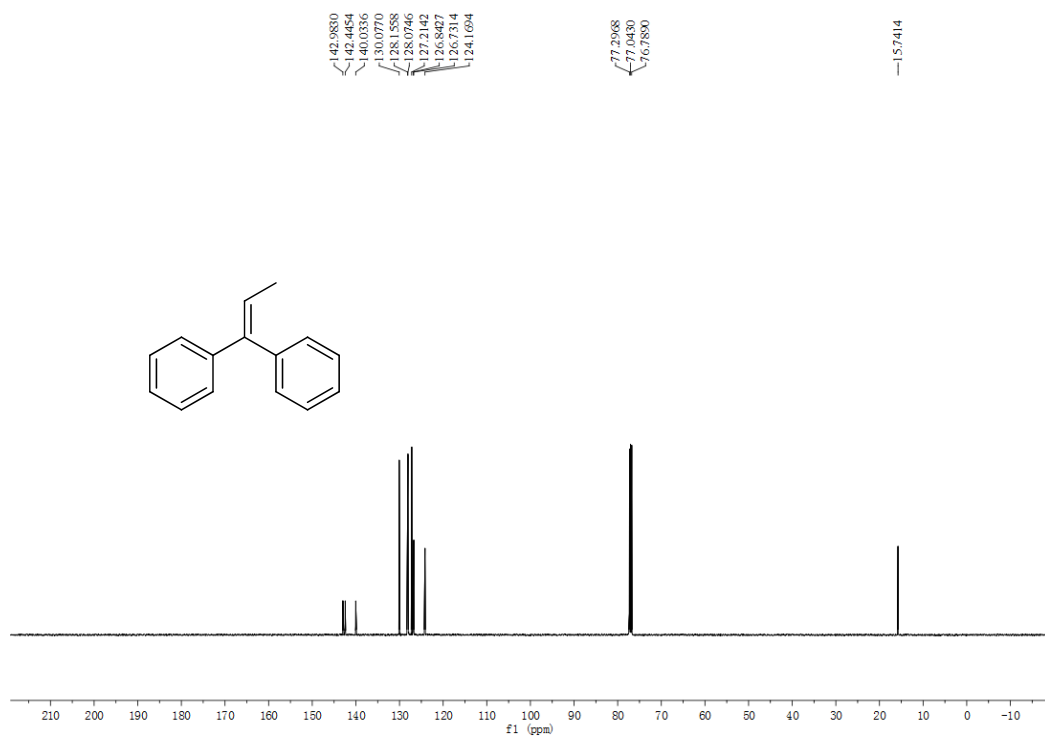

4b

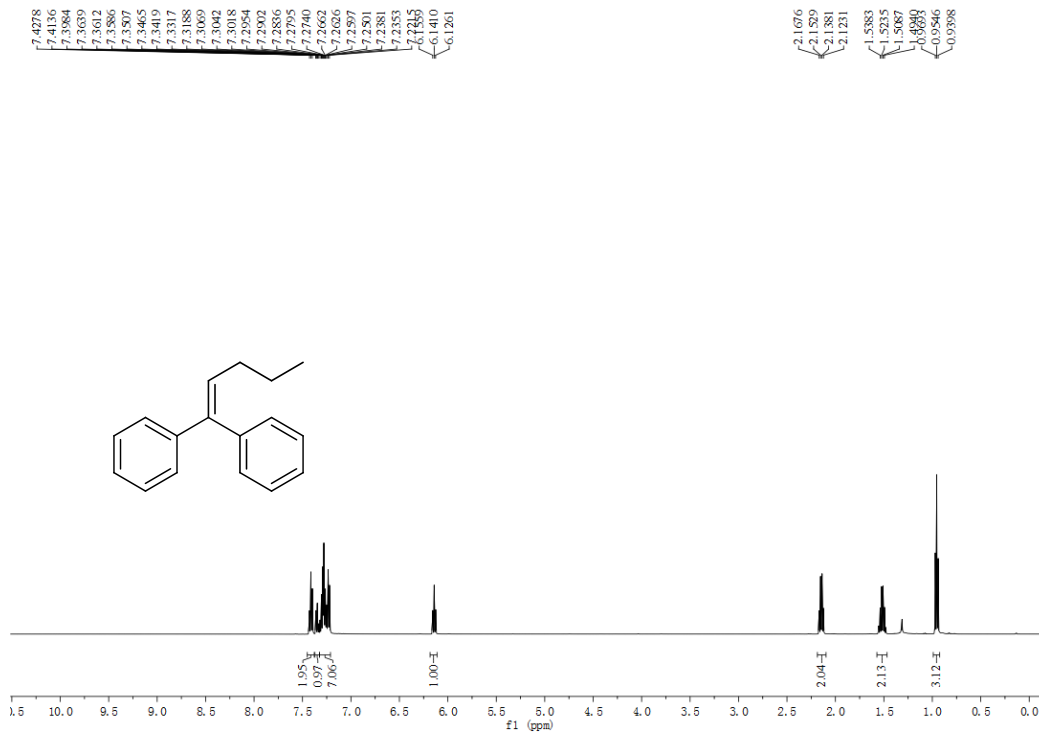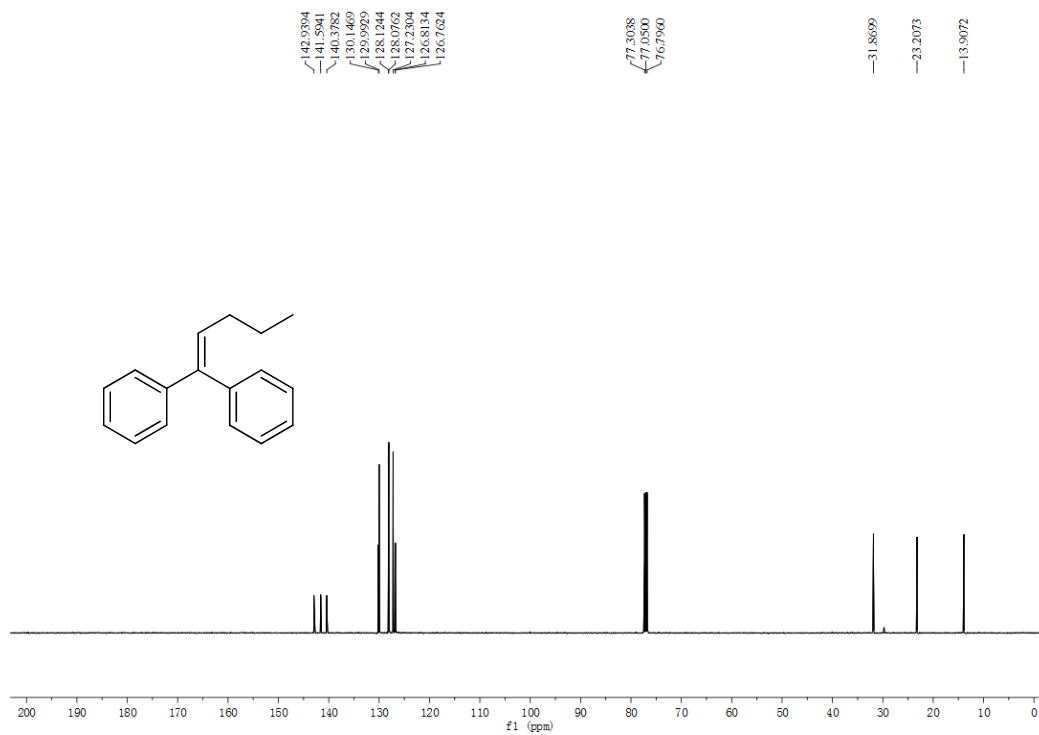

4c

7.4177  
7.4068  
7.4036  
7.4012  
7.3913  
7.3885  
7.3509  
7.3482  
7.3361  
7.3086  
7.2966  
7.2899  
7.2815  
7.2841  
7.2801  
7.2604  
7.2600  
7.2605  
7.2560  
7.2522  
7.2482  
7.2398  
7.2269  
7.2240  
7.2200  
7.2104  
6.7881  
6.1251  
6.1102

2.1782  
2.1635  
2.1487  
2.1337  
1.4645  
1.4498  
1.3628  
1.3543  
0.8996  
0.8881

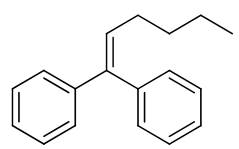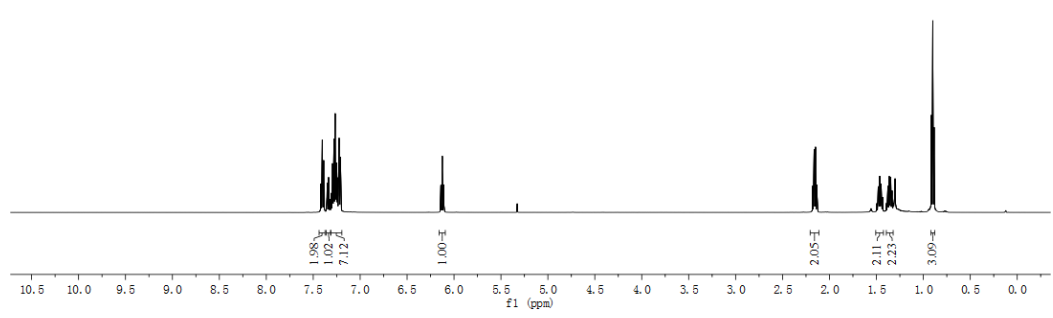

142.9372  
141.4050  
140.3331  
136.5271  
128.1074  
128.0619  
127.2121  
126.8006  
126.7323

77.2926  
77.0388  
76.7850

32.1981  
29.5176  
22.3902  
14.0085

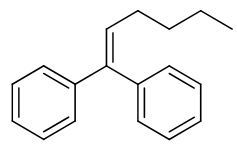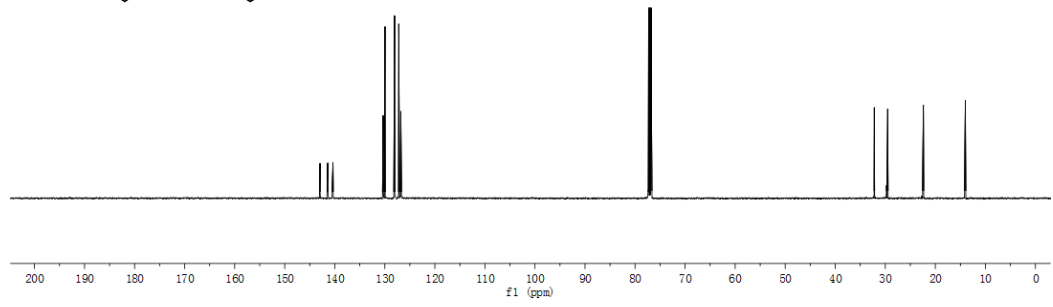

4d

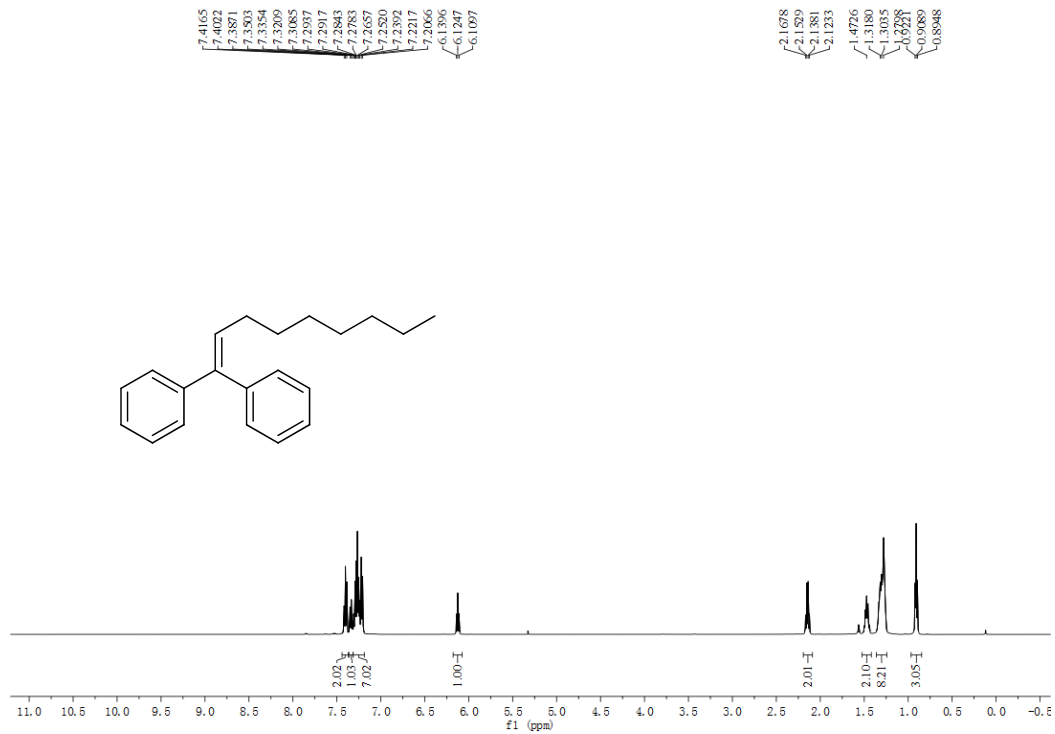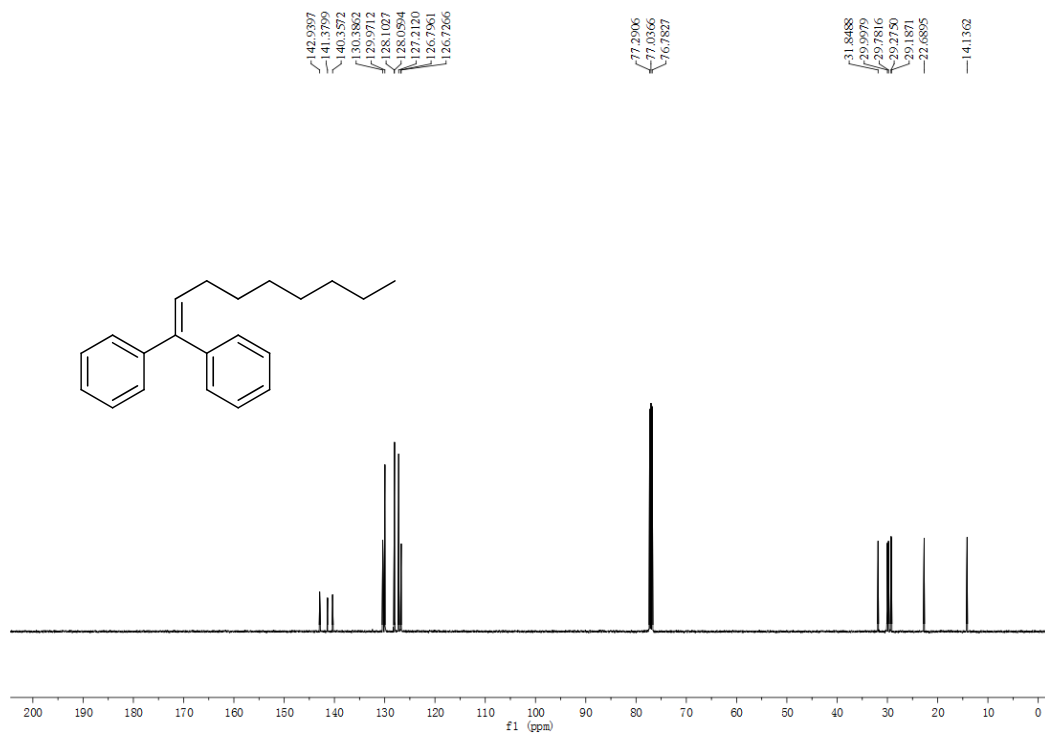

4e

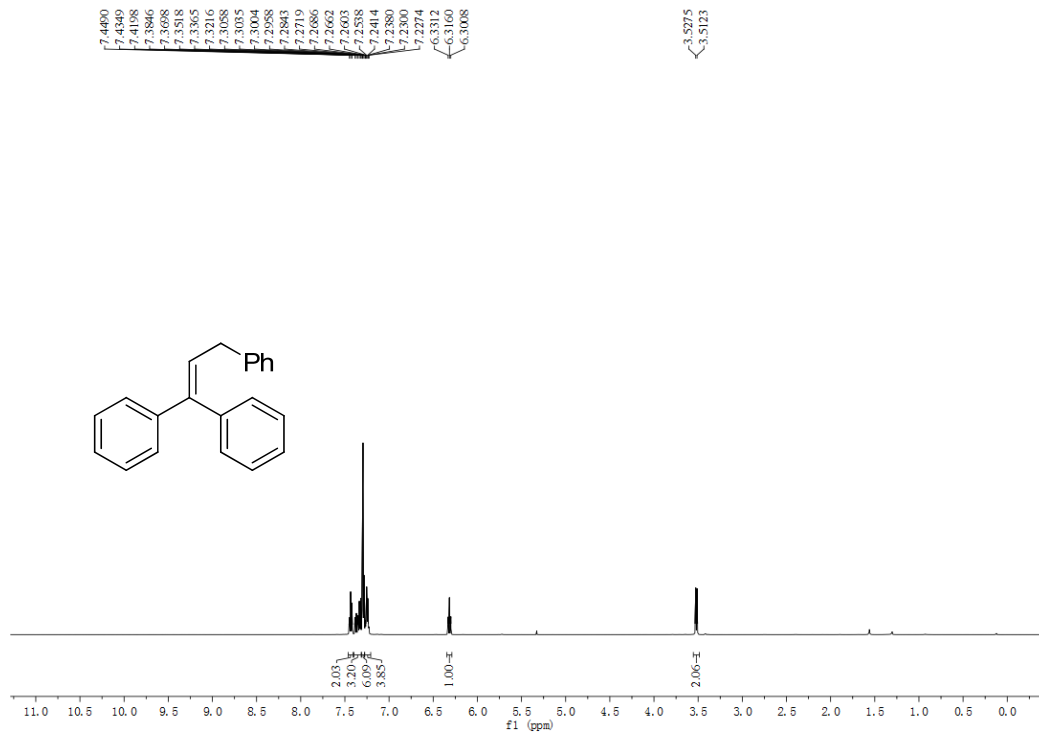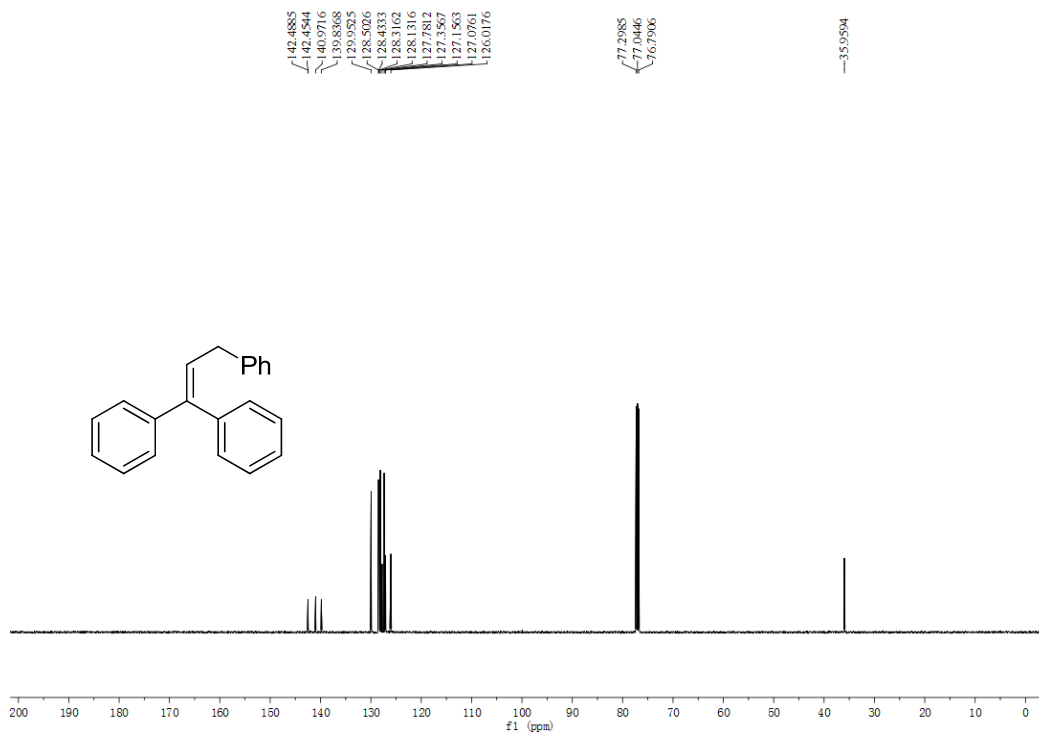

**4f(E)**

7.4613  
7.4586  
7.4548  
7.4443  
7.4426  
7.3607  
7.3569  
7.3331  
7.3460  
7.3426  
7.3303  
7.3266  
7.2983  
7.2782  
7.2756  
7.2676  
7.2639  
7.2597  
7.2570  
7.2491  
7.2463  
7.2425  
7.2377  
7.0535  
6.0310  
6.0283  
6.0257  
6.0188  
6.0162  
6.0135  
6.0110  
6.0040  
6.0015  
5.9988  
5.9964

3.6202  
3.6055

2.1881  
2.1863

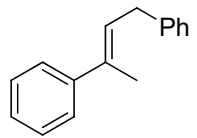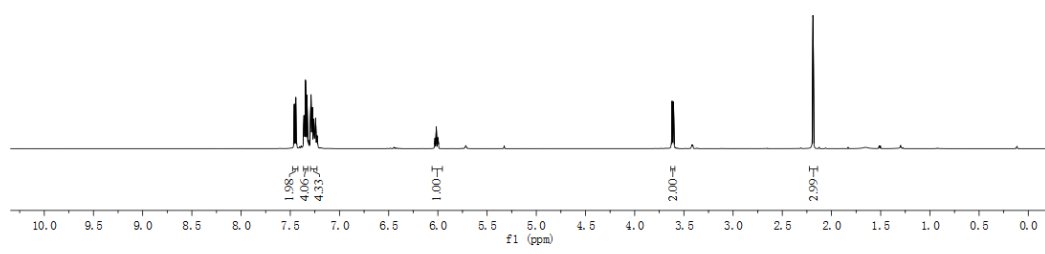

143.6468  
141.0350  
138.6070  
138.4070  
138.4472  
138.2006  
126.7527  
126.7423  
125.9659  
125.7462

77.2915  
77.0376  
76.7837

34.9936

16.0007

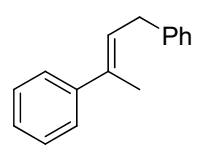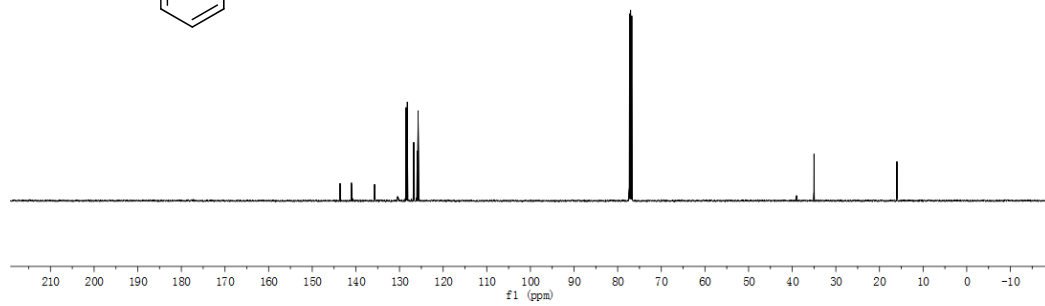

4f(Z)

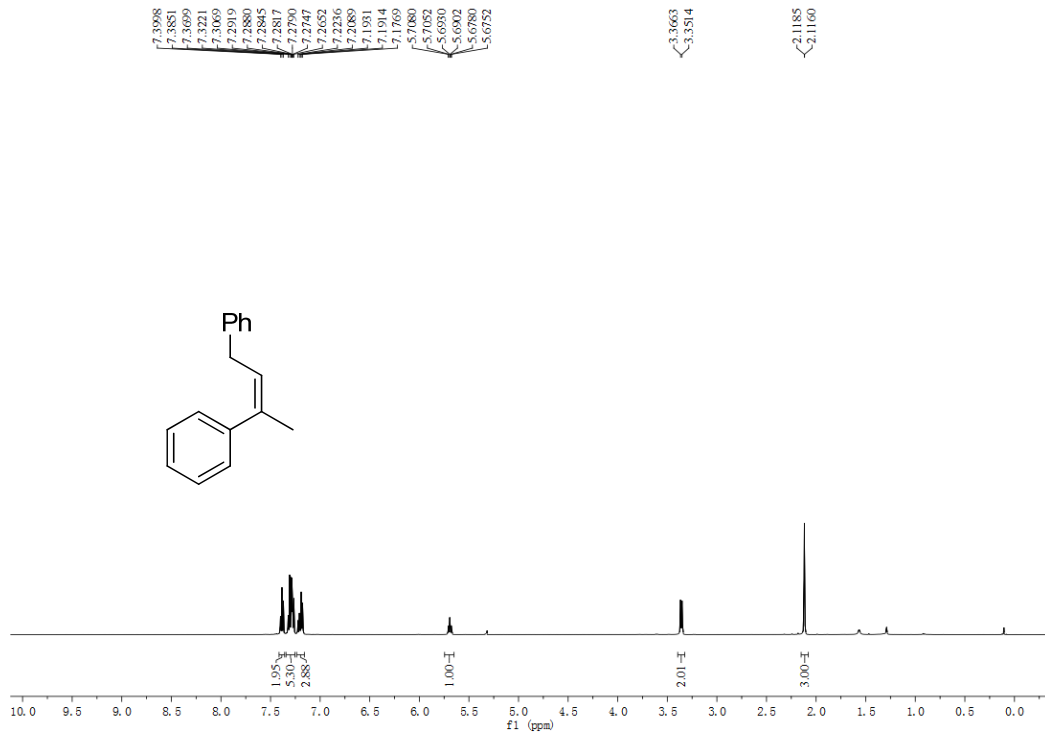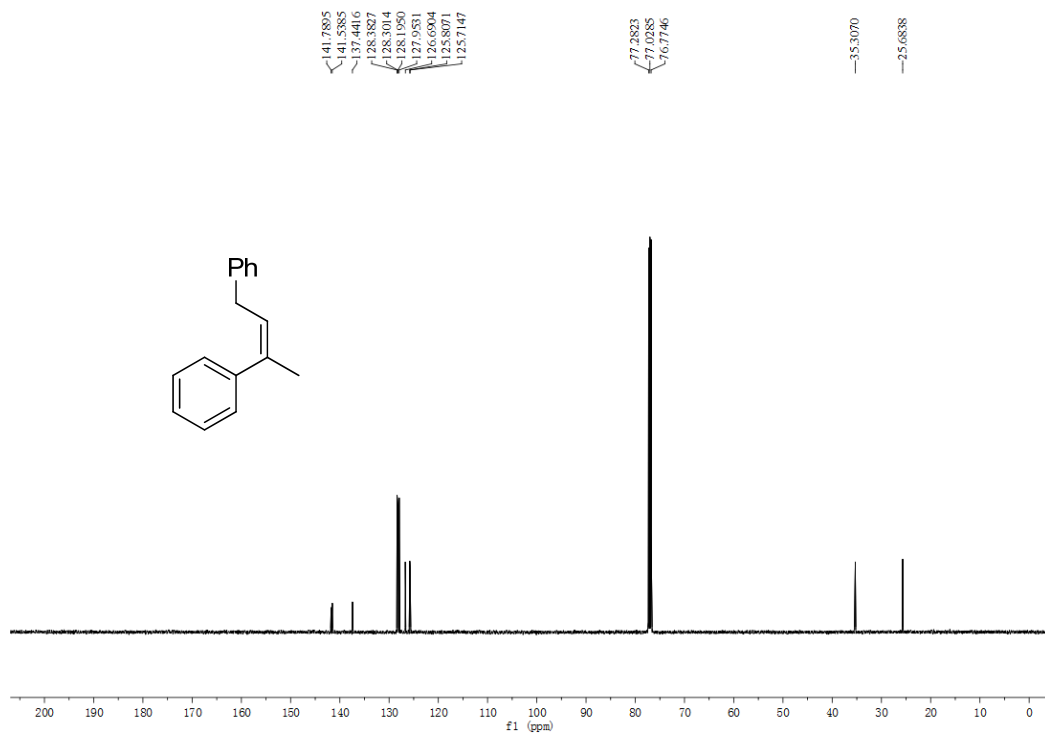

4g

7.3777  
7.3752  
7.3684  
7.3628  
7.3574  
7.3541  
7.3496  
7.3462  
7.3418  
7.3390  
7.3318  
7.3303  
7.3273  
7.3229  
7.3175  
7.3120  
7.3099  
7.3078  
7.2470  
7.2455  
7.2374  
7.2356  
7.1866  
7.1800  
7.1627  
7.1642  
7.1556  
7.1520  
7.1473  
7.1439  
7.1399  
7.1343  
7.0738  
7.0702  
7.0576  
7.0041

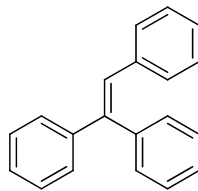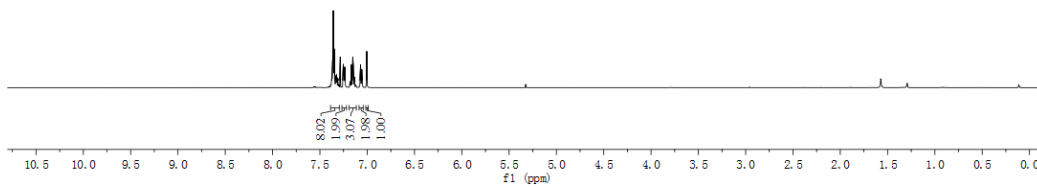

145.4895  
142.5953  
140.3669  
137.8669  
130.3869  
129.5555  
128.6378  
128.2120  
128.1723  
127.9701  
127.6167  
127.5144  
127.4161  
126.7521  
77.2887  
77.0348  
76.7810

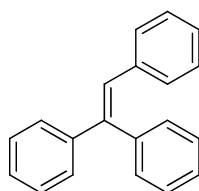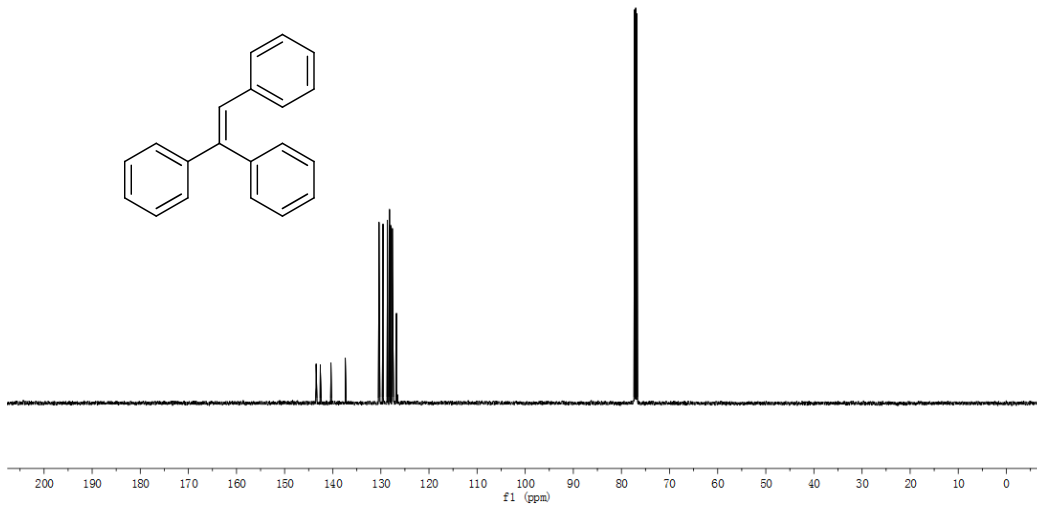



4h

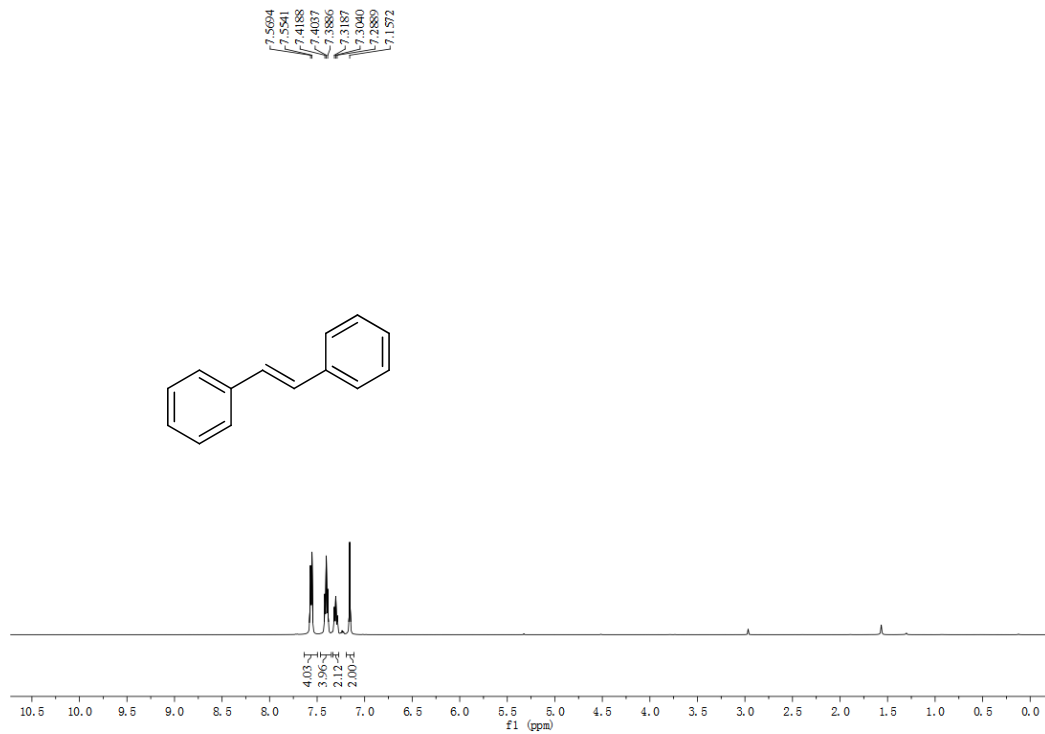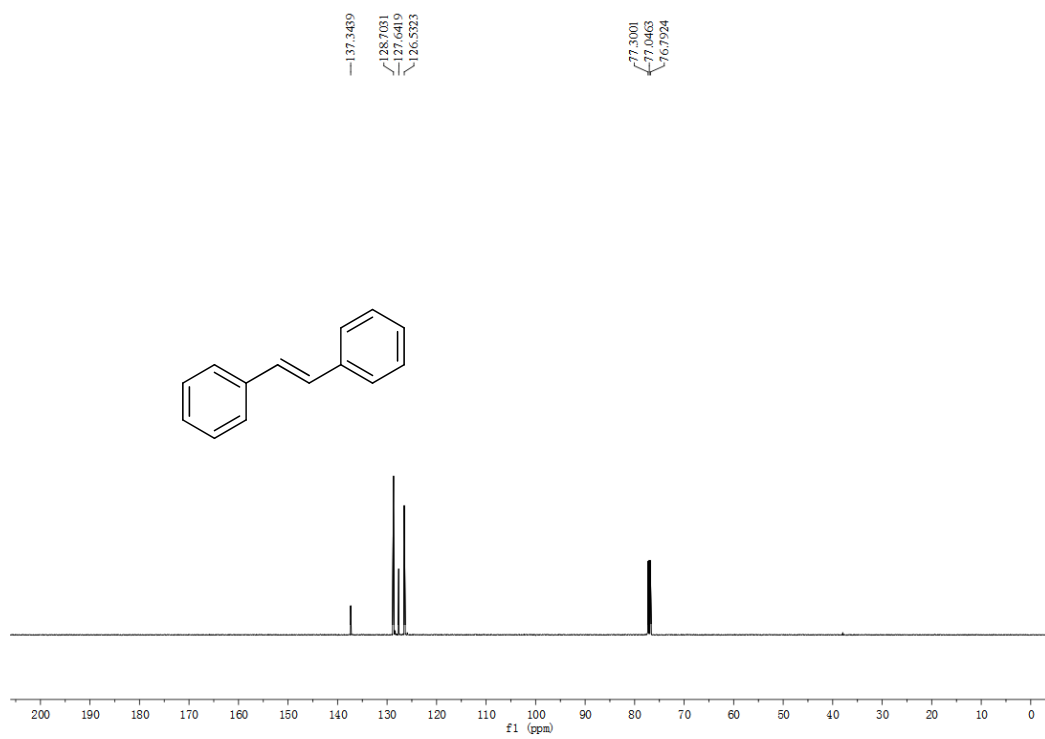

4i

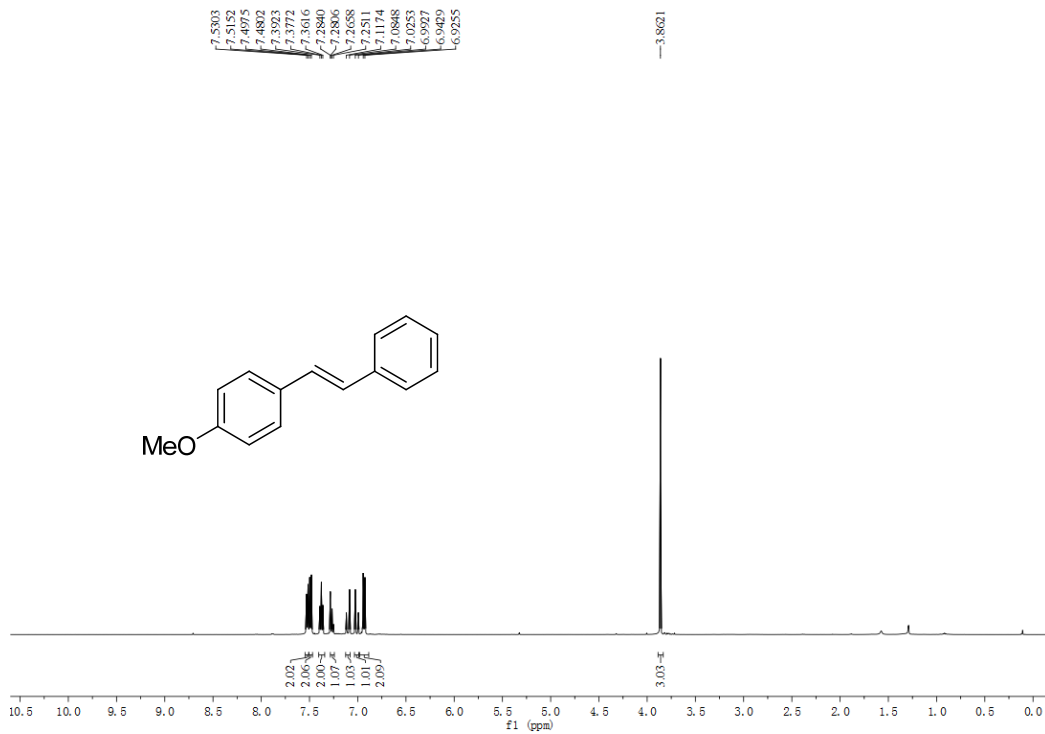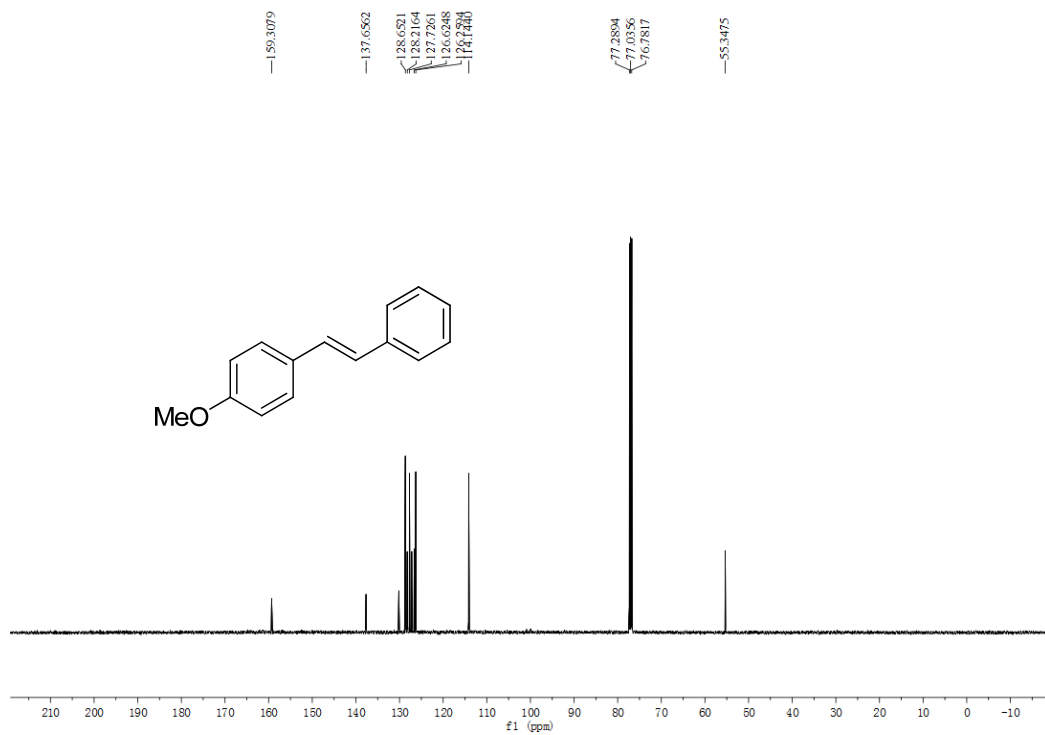

4j

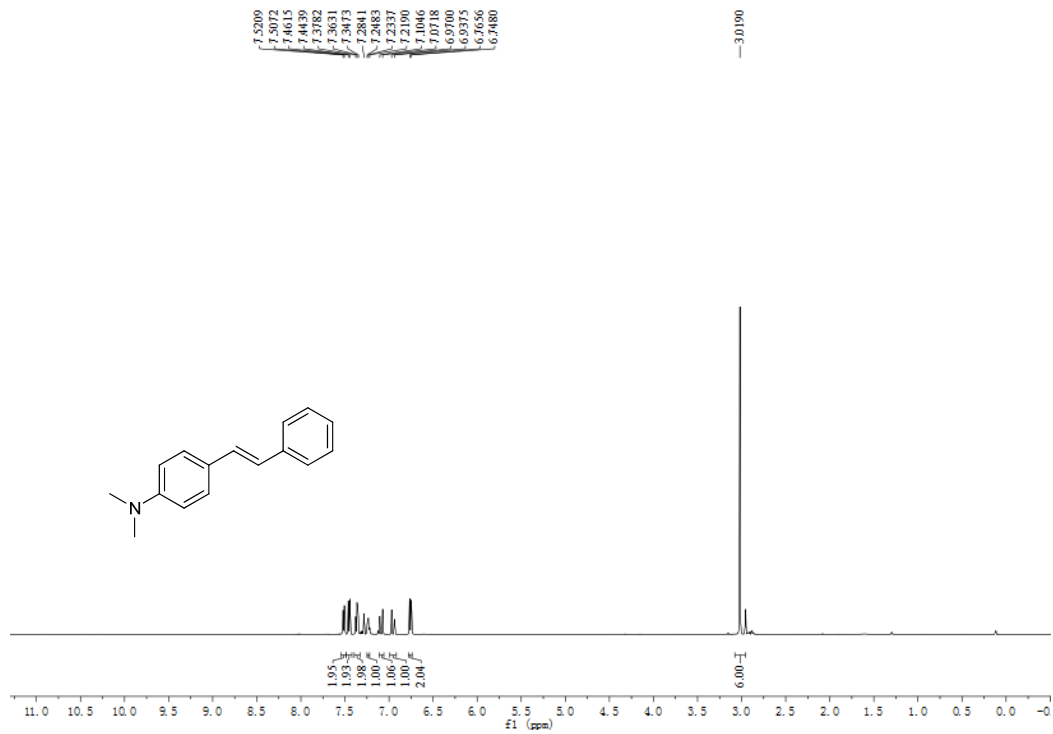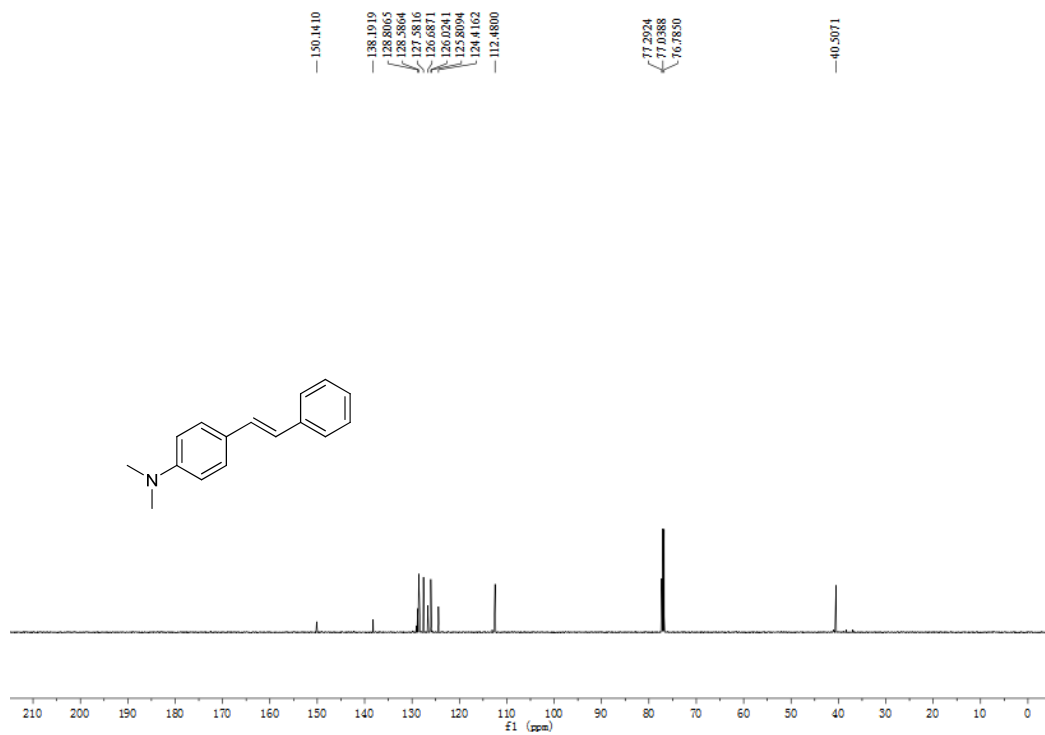

4k

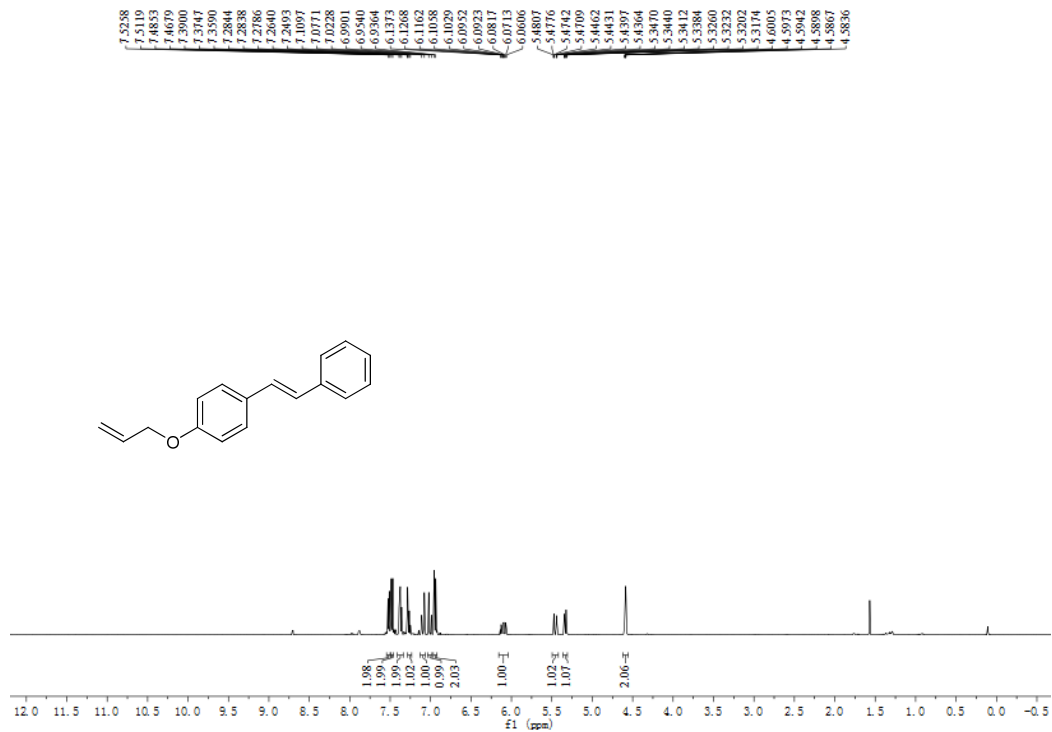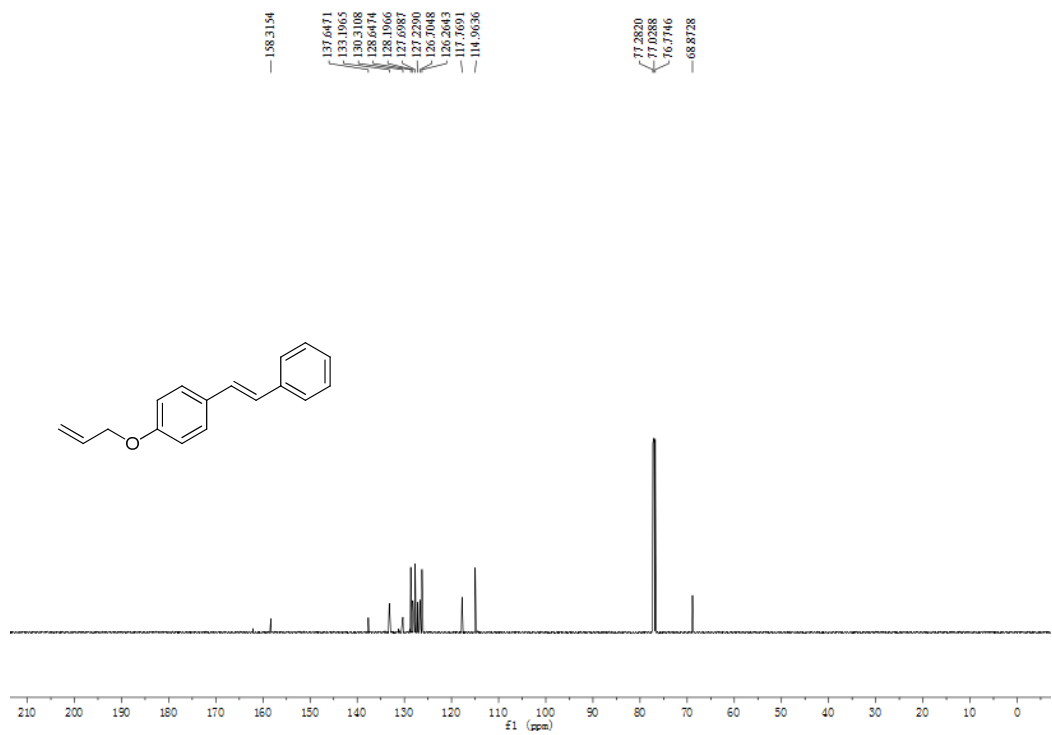

41

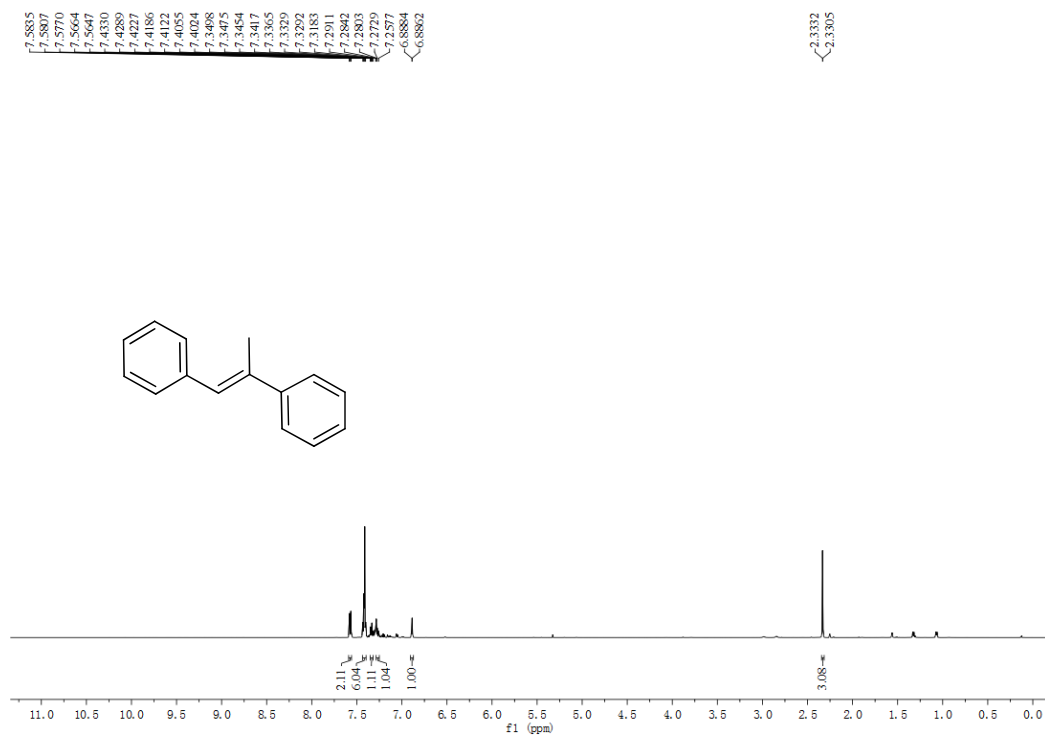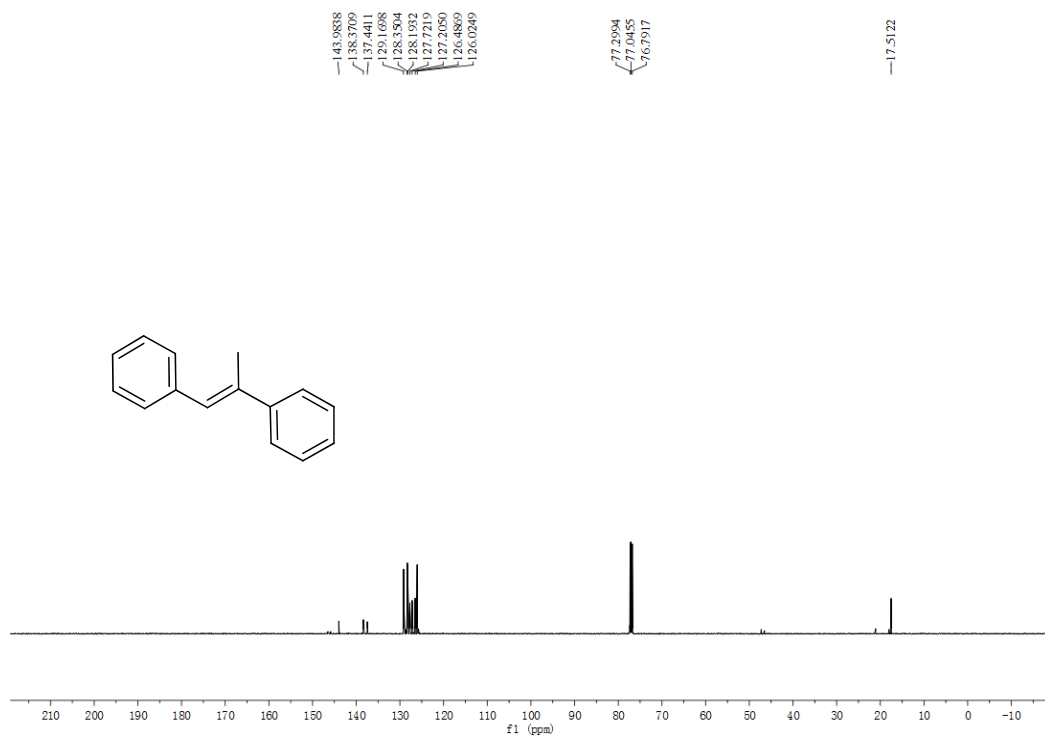

4m

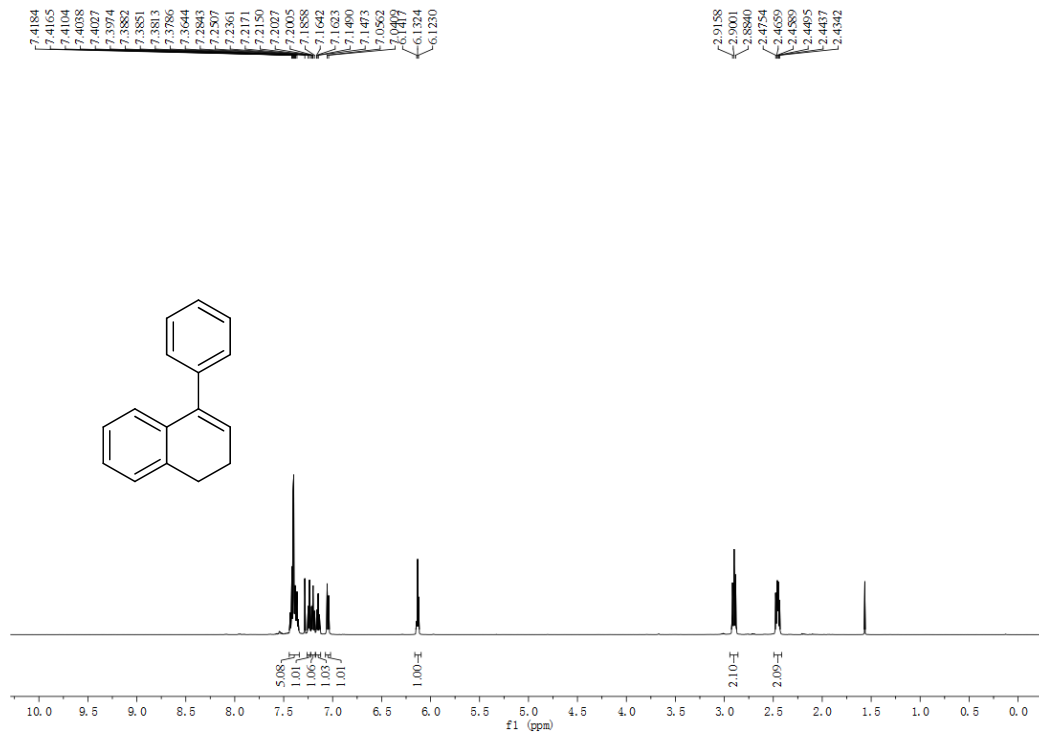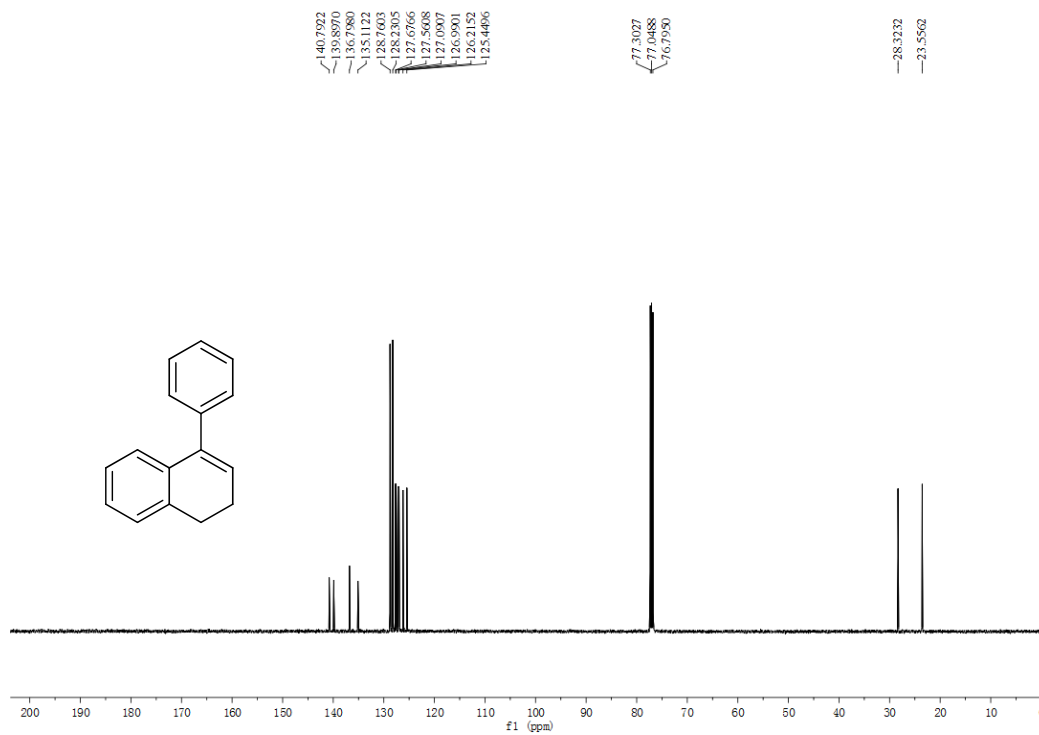

4n

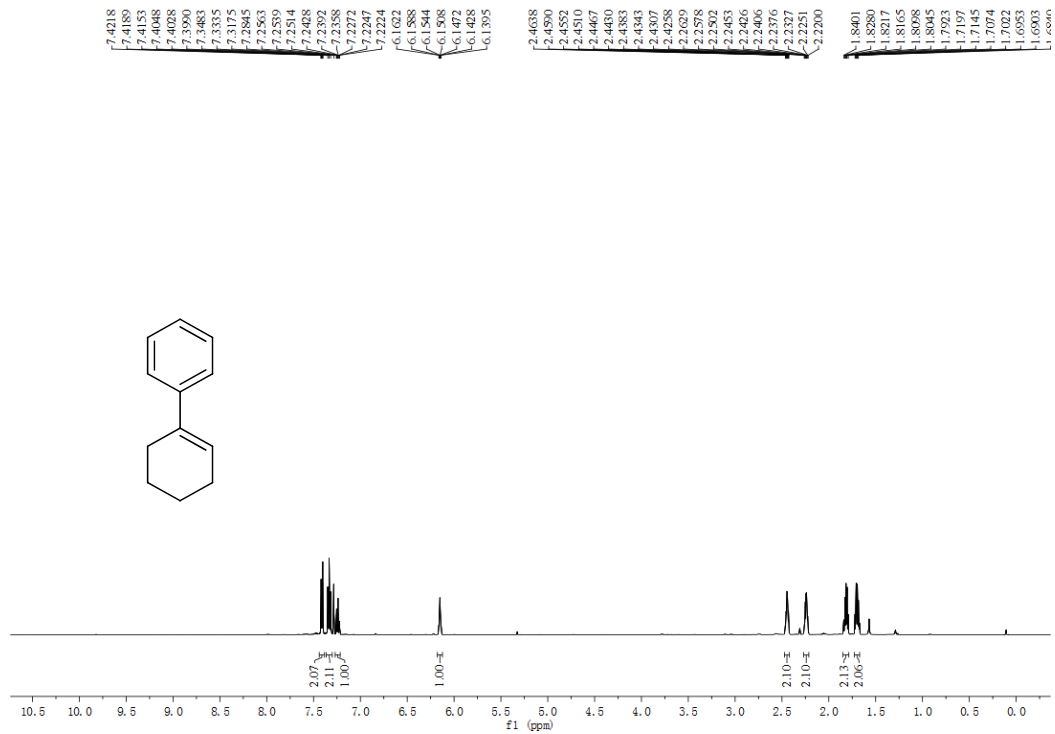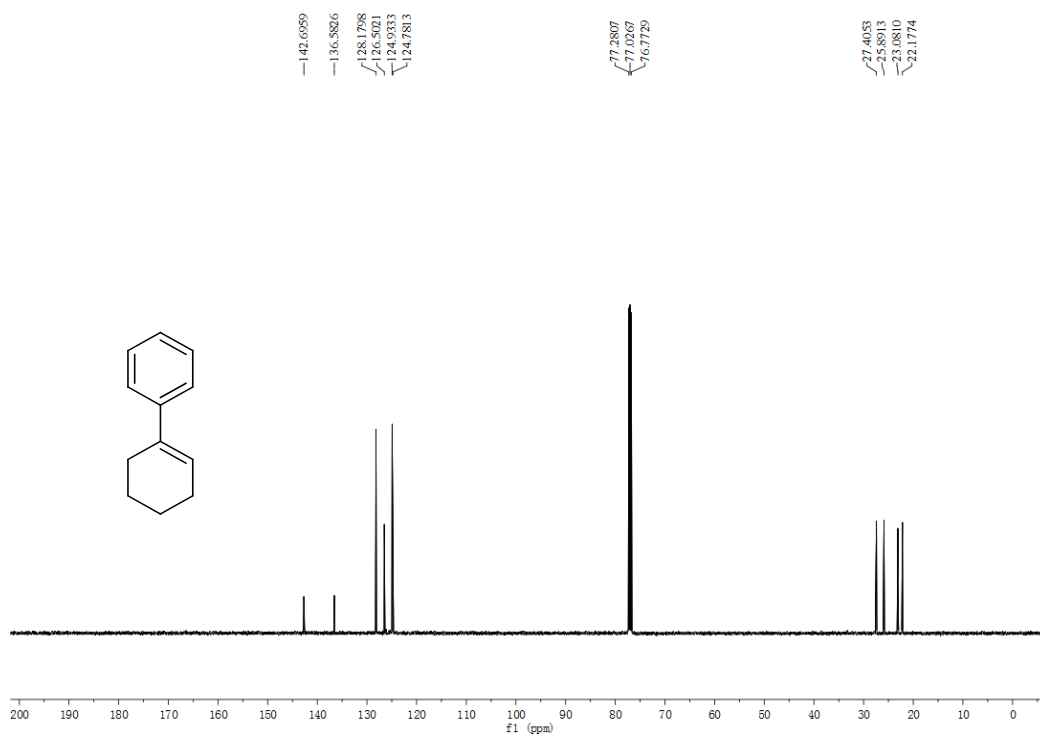

40

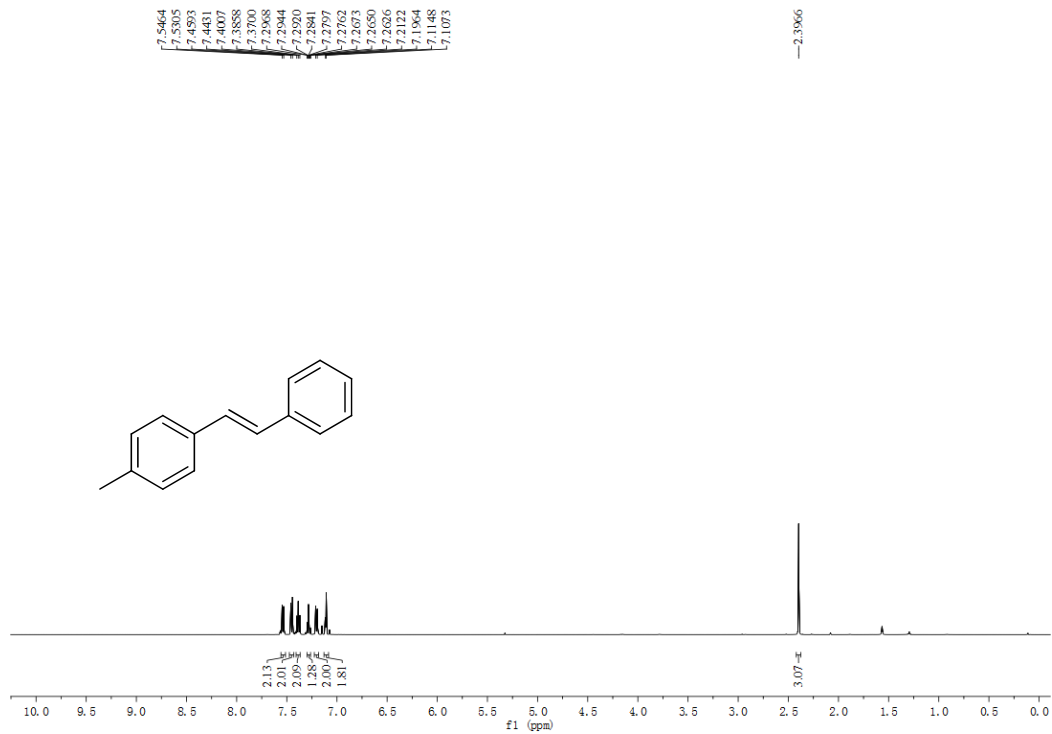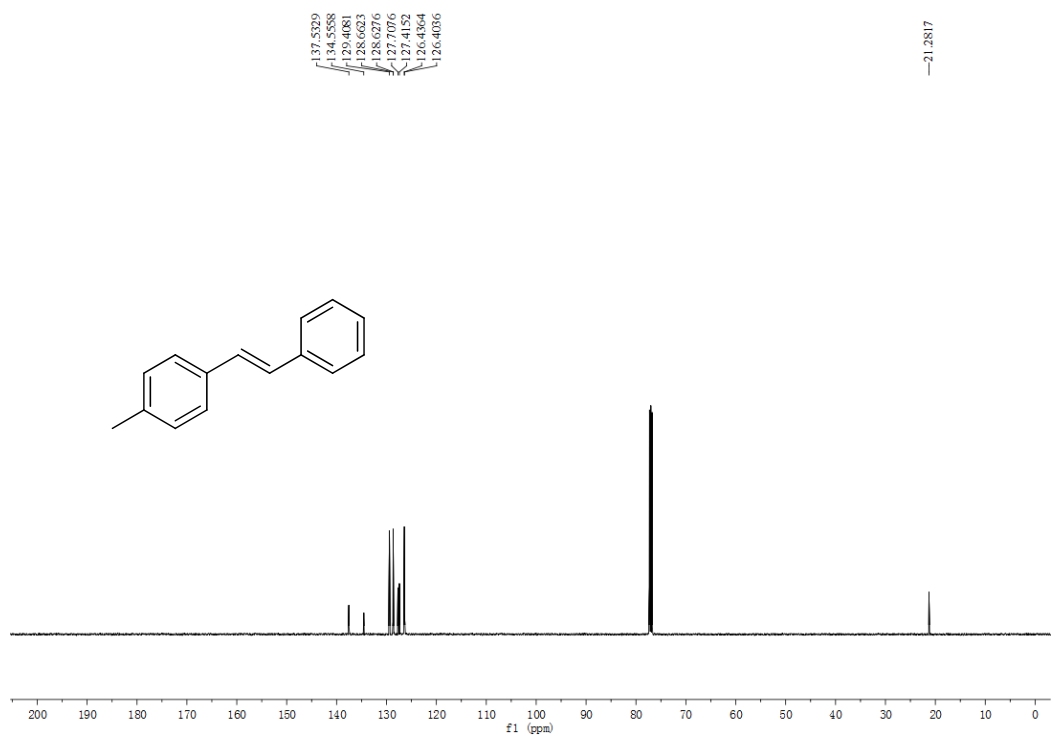



4p

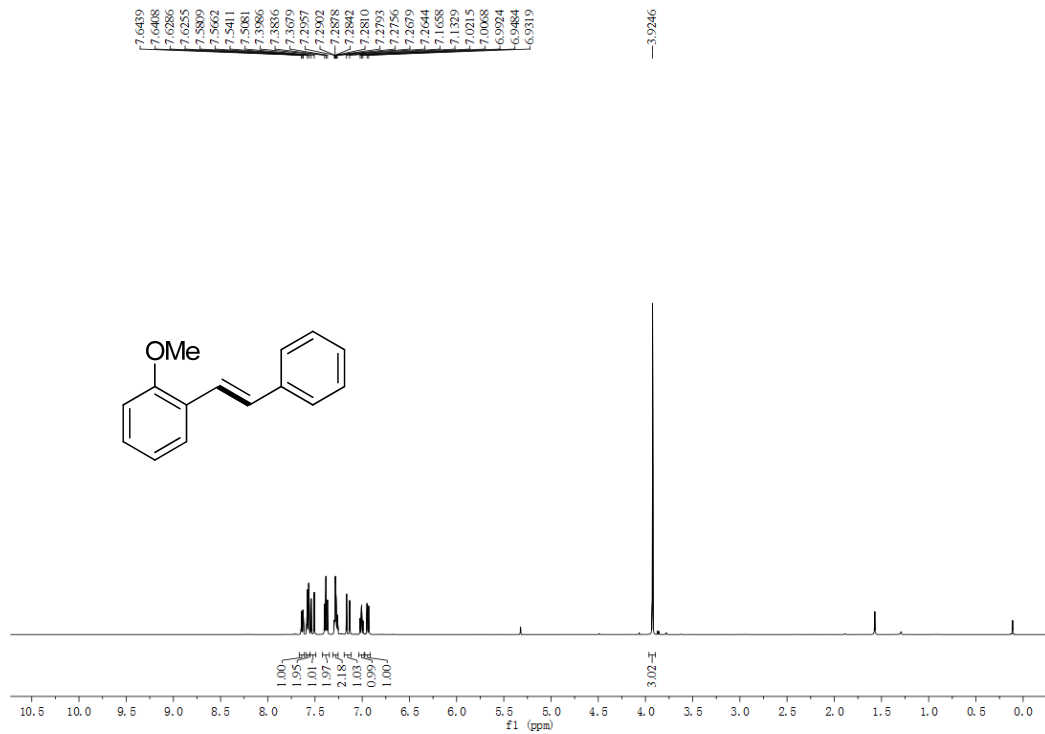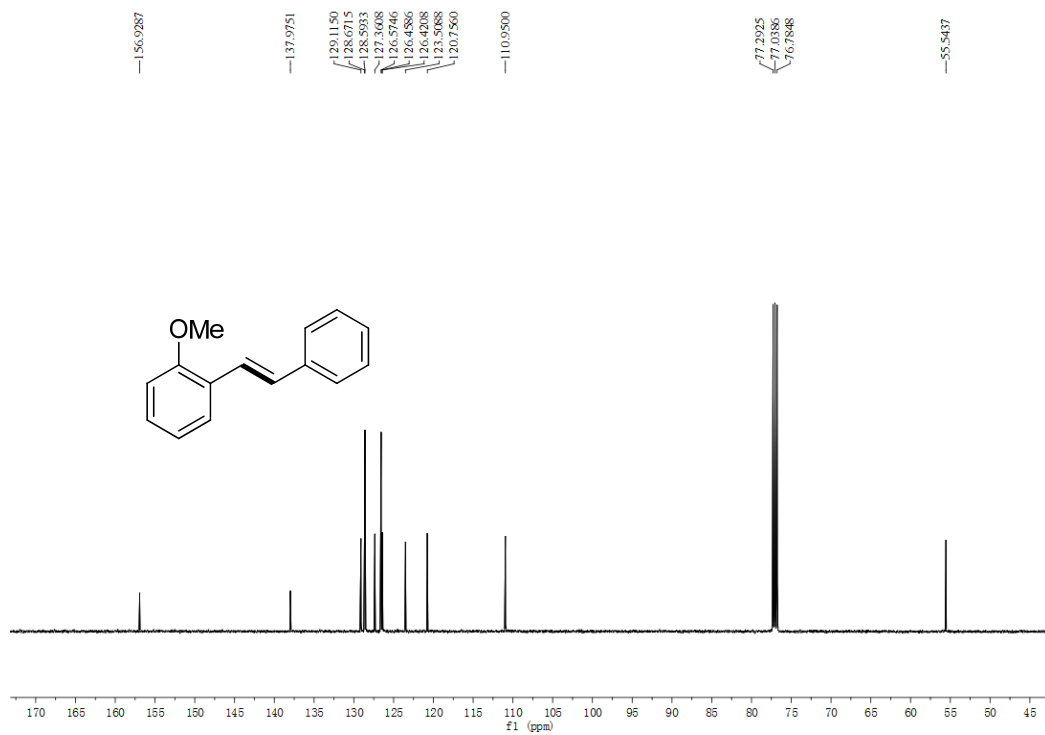

4q

7.5042  
7.4901  
7.4378  
7.4378  
7.3888  
7.3707  
7.3581  
7.2947  
7.2887  
7.2843  
7.2800  
7.2777  
7.2741  
7.2593  
7.2584  
7.0886  
6.9470  
6.9445  
6.6608  
6.6472  
6.6452  
6.6405  
6.3896  
6.3830

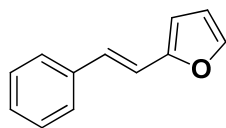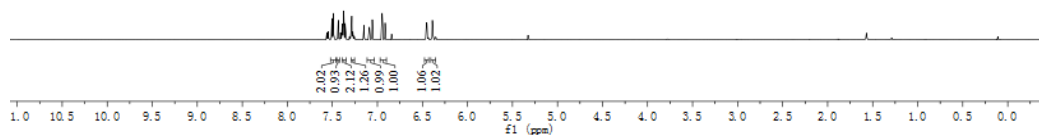

153.2724  
142.1391  
137.0204  
128.6914  
127.5776  
127.1410  
126.5269  
116.5404  
111.6451  
108.5449  
77.2859  
77.0328  
76.7786

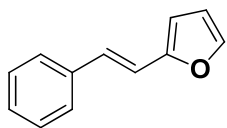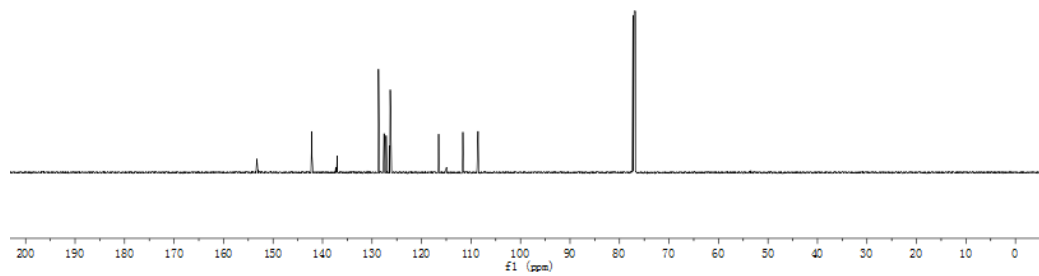

4r

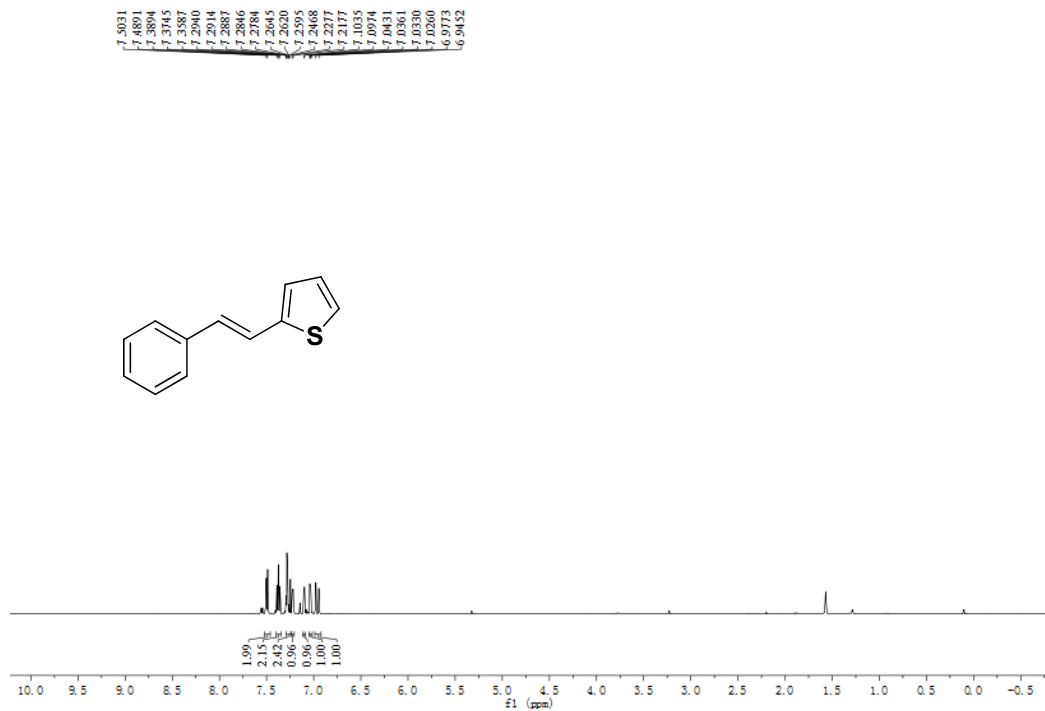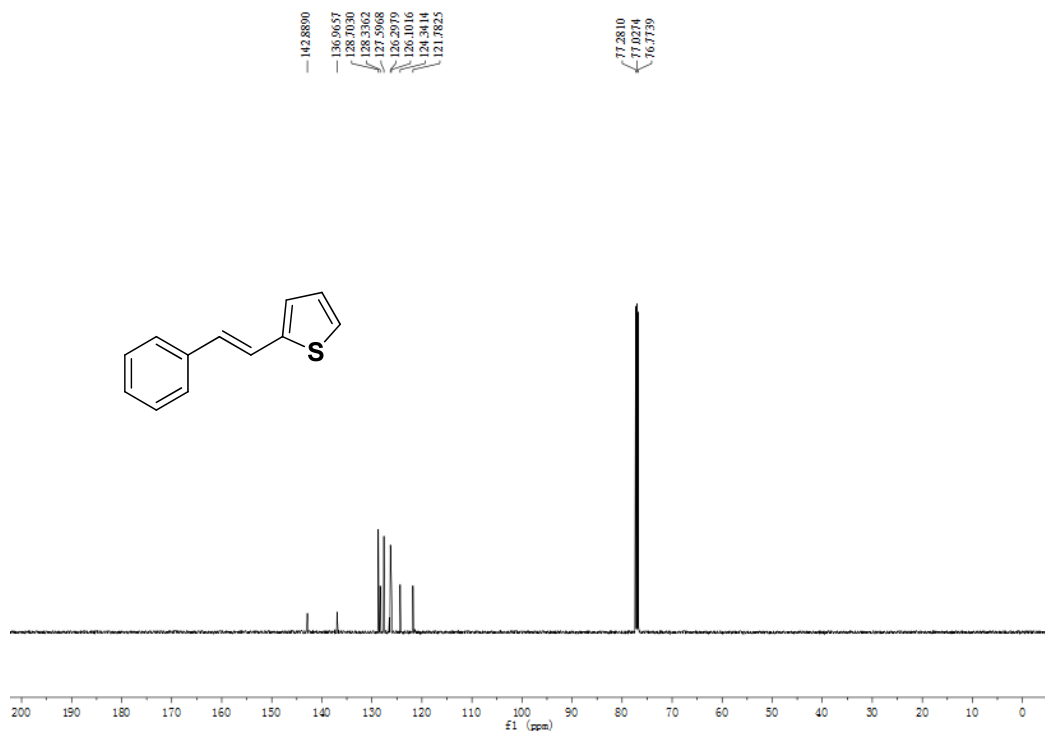

4s

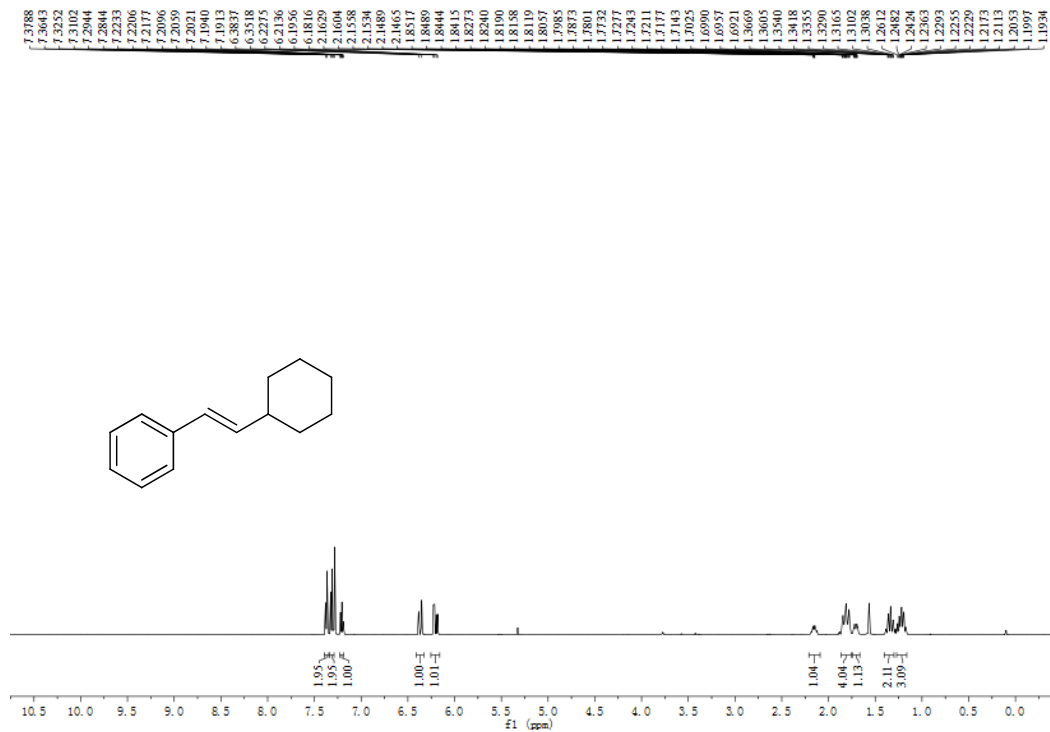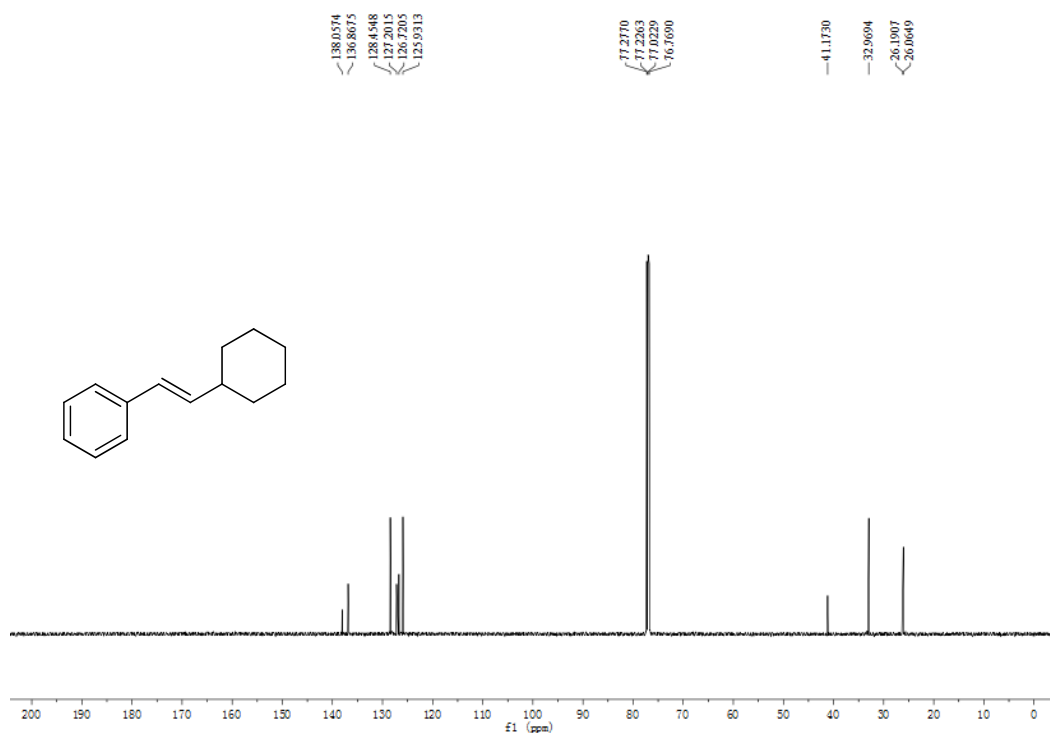

7. Crude <sup>1</sup>H NMR and HRMS copies of cross azines.

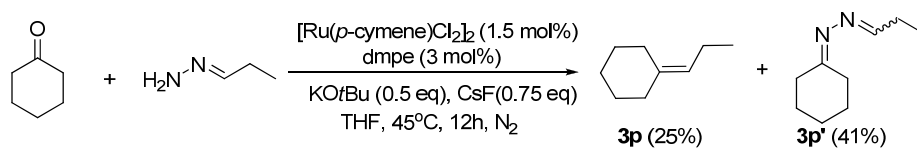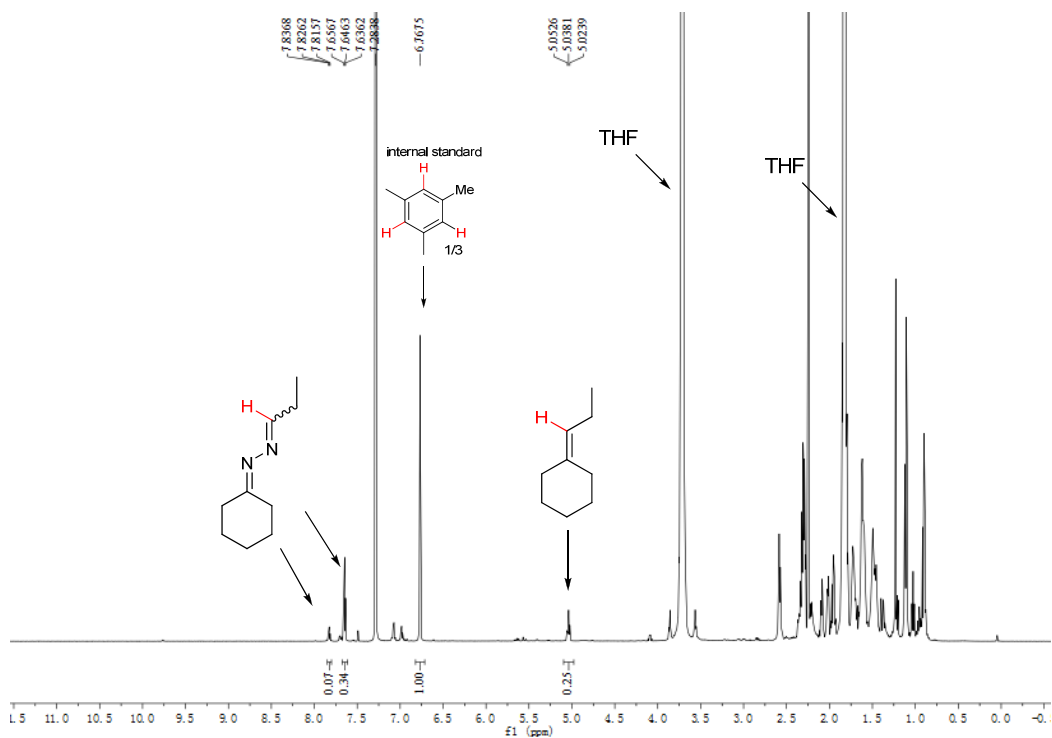

Crude NMR

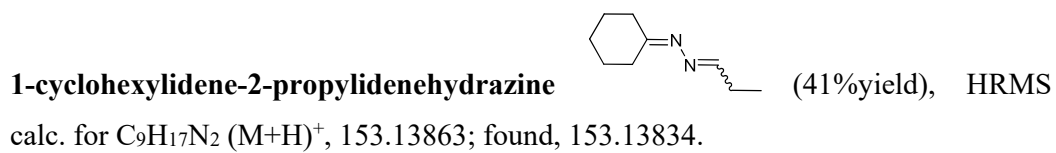

170213-02HRAPCI-Li-WeiWei-wx-687 #176-180 RT: 0.41-0.42 AV: 5 NL: 7.94E9  
T: FTMS + p APCI corona Full ms [80.00-300.00]

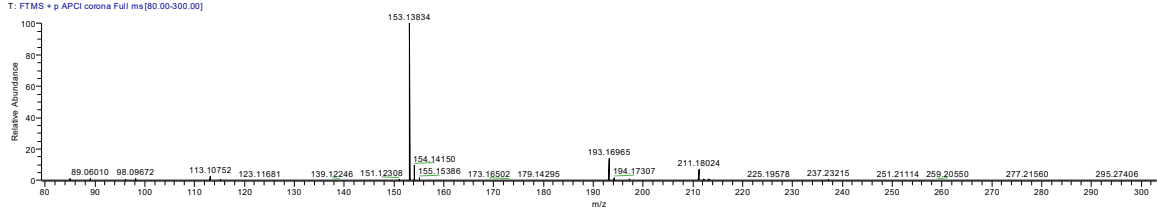

170213-02HRAPCI-Li-WeiWei-wx-687 #176-180 RT: 0.41-0.42 AV: 5 NL: 7.94E9  
T: FTMS + p APCI corona Full ms [80.00-300.00]

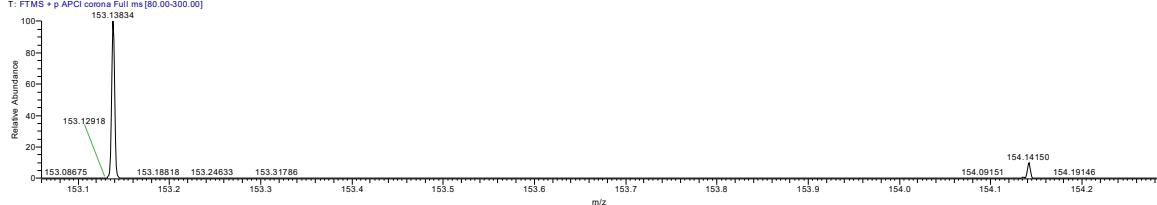

170213-02HRAPCI-Li-WeiWei-wx-687 #176-180 RT: 0.41-0.42 AV: 5

T: FTMS + p APCI corona Full ms [80.00-300.00]

m/z = 153.13489-153.14501

| m/z       | Intensity    | Relative Resolution | Charge   | Theo. Mass | Delta (ppm) | RDB equiv. | Composition                                       |
|-----------|--------------|---------------------|----------|------------|-------------|------------|---------------------------------------------------|
| 153.13834 | 7991873024.0 | 100.00              | 43108.14 | 1.00       | 153.13863   | -1.85      | 2.5 C <sub>9</sub> H <sub>17</sub> N <sub>2</sub> |

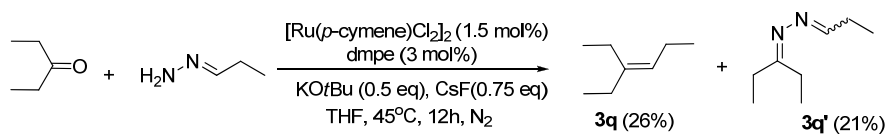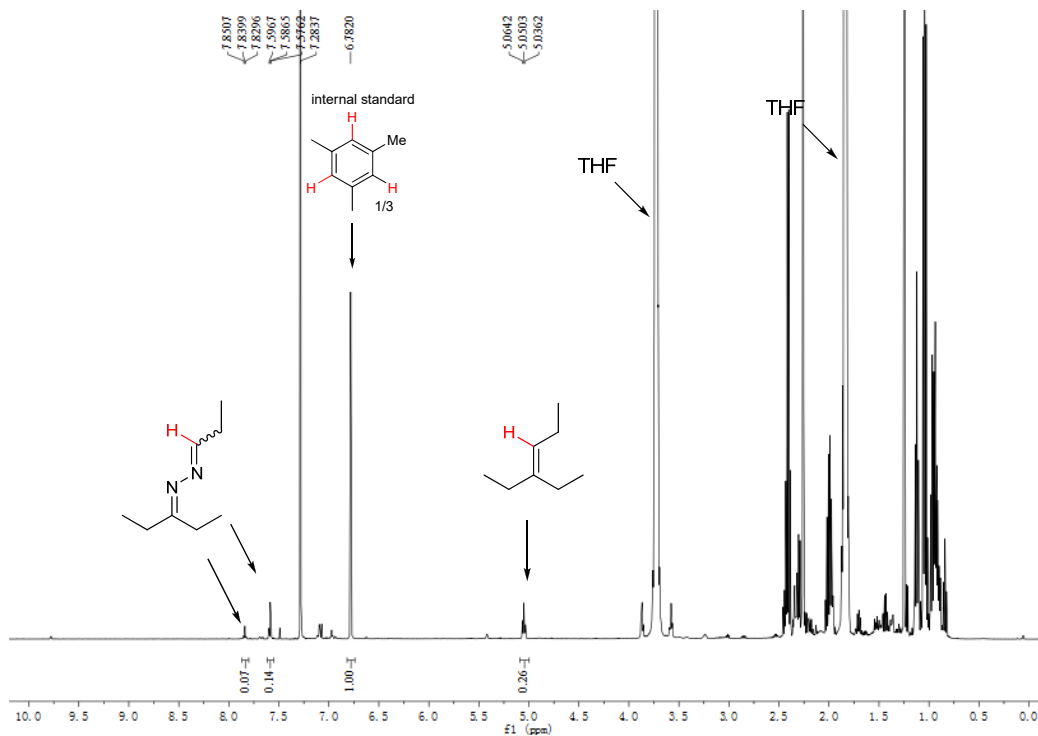

# 1-(pentan-3-ylidene)-2-propylidenehydrazine

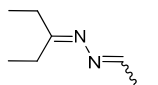

(21% yield), HRMS

calc. for  $C_8H_{17}N_2$  ( $M+H$ )<sup>+</sup>, 141.13863; found, 141.13869.

170214-01HRAPCI-Li-Wei Wei-wx700

2/14/2017 10:22:57 AM

170214-01HRAPCI-Li-Wei Wei-wx700 #195-198 RT: 0.45-0.46 AV: 4 NL: 5.83E9  
T: FTMS + p APCI corona Full ms [75.00-300.00]

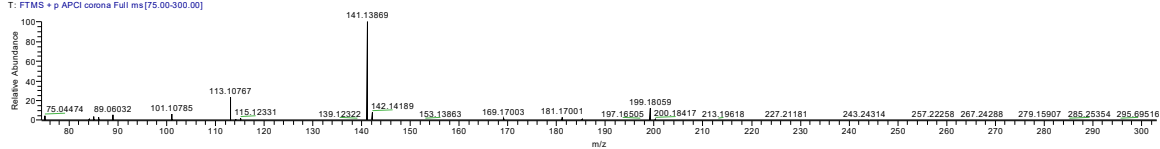

170214-01HRAPCI-Li-Wei Wei-wx700 #195-198 RT: 0.45-0.46 AV: 4 NL: 5.83E9  
T: FTMS + p APCI corona Full ms [75.00-300.00]

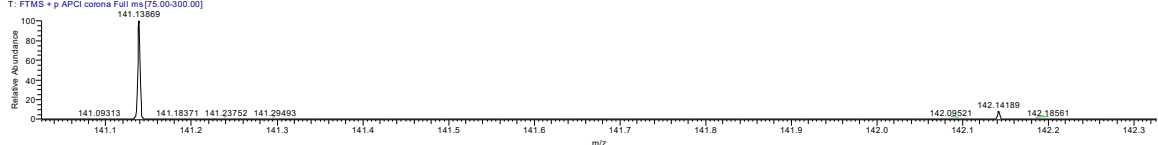

| m/z       | Intensity    | Relative Resolution | Charge   | Theo. Mass | Delta (ppm) | RDB equiv. | Composition                                       |
|-----------|--------------|---------------------|----------|------------|-------------|------------|---------------------------------------------------|
| 141.13869 | 5951567360.0 | 100.00              | 46054.66 | 1.00       | 141.13863   | 0.45       | 1.5 C <sub>8</sub> H <sub>17</sub> N <sub>2</sub> |

| m/z       | Intensity    | Relative Resolution | Charge   | Theo. Mass | Delta (ppm) | RDB equiv. | Composition                                       |
|-----------|--------------|---------------------|----------|------------|-------------|------------|---------------------------------------------------|
| 113.10767 | 1356701824.0 | 100.00              | 50451.31 | 1.00       | 113.10732   | 3.09       | 1.5 C <sub>6</sub> H <sub>13</sub> N <sub>2</sub> |

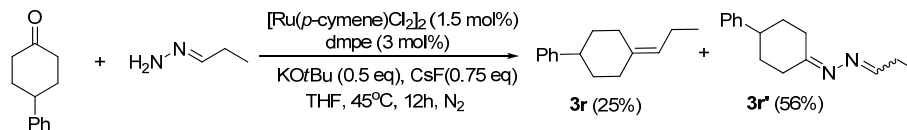

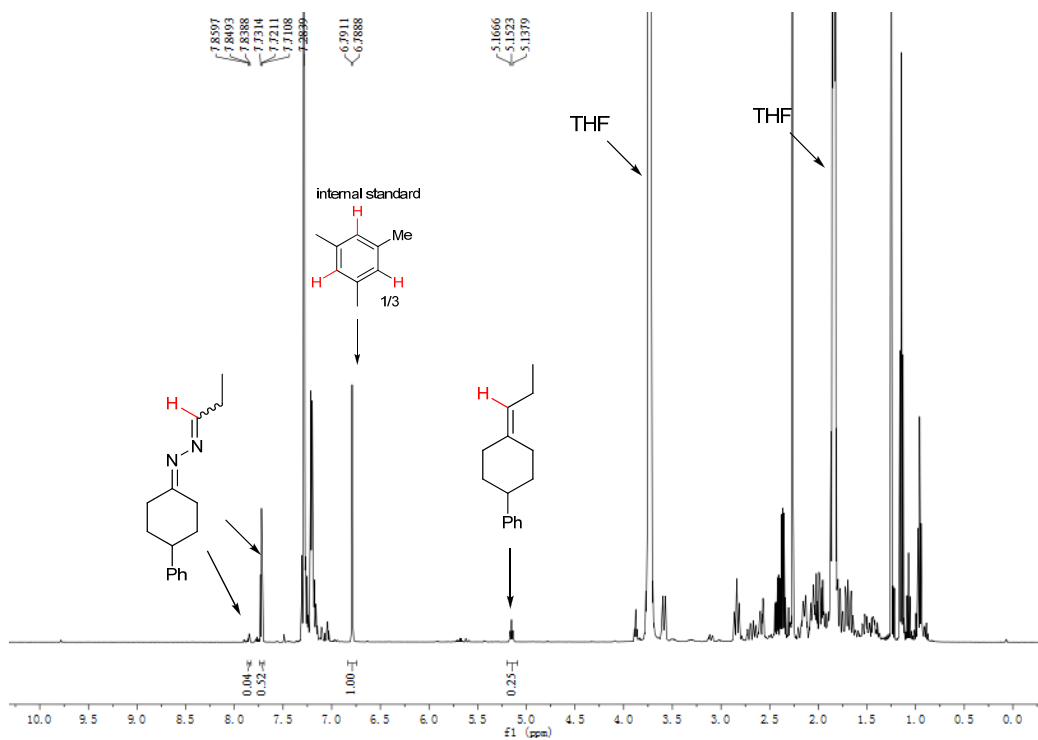

**1-(4-phenylcyclohexylidene)-2-propylidenehydrazin** (56% yield),  
 HRMS calc. for C<sub>15</sub>H<sub>21</sub>N<sub>2</sub> (M+H)<sup>+</sup>, 229.16993; found, 229.16964.

170213-03HRAPCI-Li-WeiWei-wx-683

2/13/2017 11:22:35 AM

170213-03HRAPCI-Li-WeiWei-wx-683 #205-211 RT: 0.48-0.49 AV: 7 NL: 8.91E9  
 T: FTMS + p APCI corona Full ms [100.00-300.00]

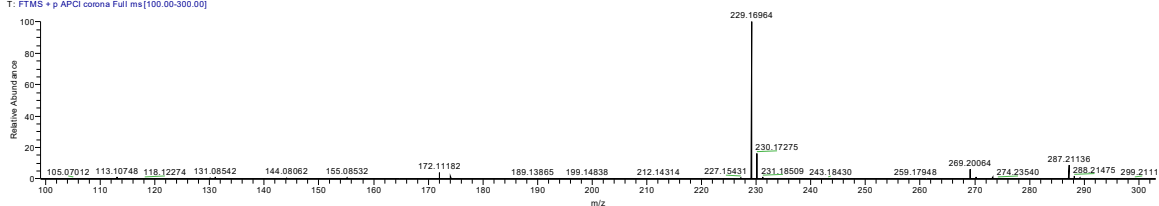

170213-03HRAPCI-Li-WeiWei-wx-683 #205-211 RT: 0.48-0.49 AV: 7 NL: 8.91E9  
 T: FTMS + p APCI corona Full ms [100.00-300.00]

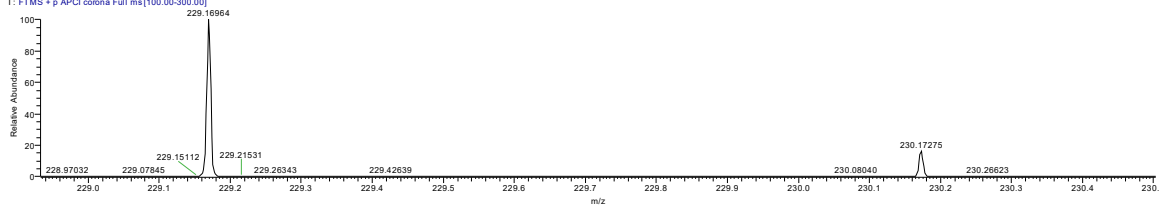

170213-03HRAPCI-Li-WeiWei-wx-683#205-211 RT: 0.48-0.49 AV: 7

T: FTMS + p APCI corona Full ms [100.00-300.00]

m/z = 229.15931-229.18177

| m/z       | Intensity    | Relative | Resolution | Charge | Theo. Mass | Delta (ppm) | RDB equiv. | Composition                                    |
|-----------|--------------|----------|------------|--------|------------|-------------|------------|------------------------------------------------|
| 229.16964 | 8991578112.0 | 100.00   | 35657.69   | 1.00   | 229.16993  | -1.23       | 6.5        | C <sub>15</sub> H <sub>21</sub> N <sub>2</sub> |



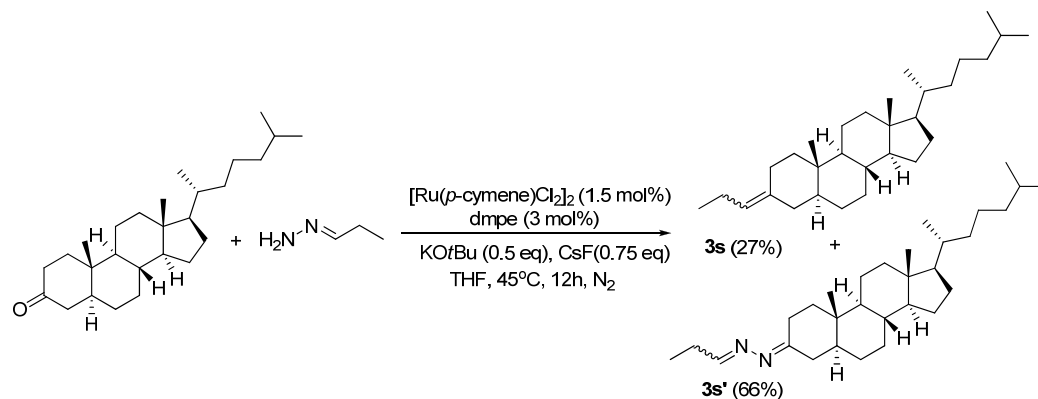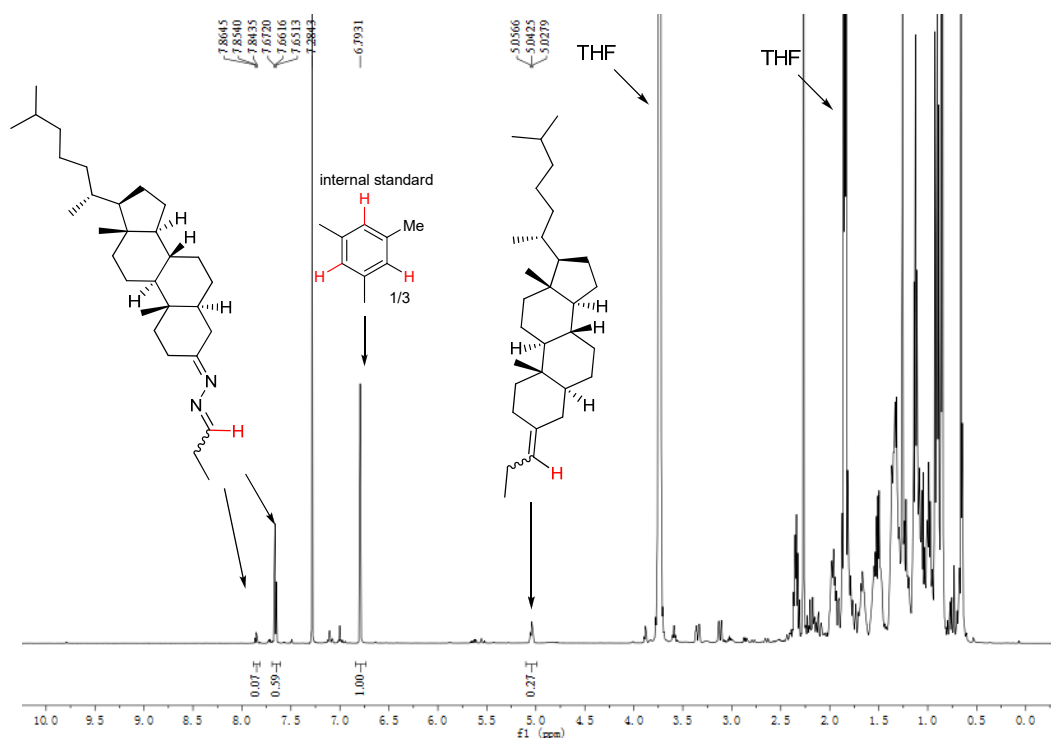

**1-((5S,8R,9S,10S,13R,14S,17R)-10,13-dimethyl-17-((R)-6-methylheptan-2-yl)hexahydro-1H-cyclopenta[a]phenanthren-3(2H,4H,10H,12H,13H,14H,15H,16H,17H)-ylidene)-2-propylidenehydrazine**

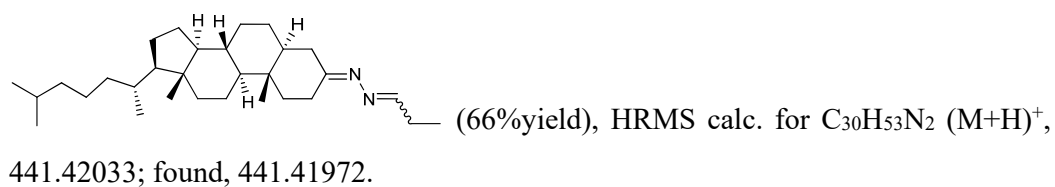

170213-07HRAPCI-Li-WeiWei-wx-688 #209-218 RT: 0.49-0.51 AV: 10 NL: 6.25E9  
 T: FTMS + p APCI corona Full ms [150.00-500.00]

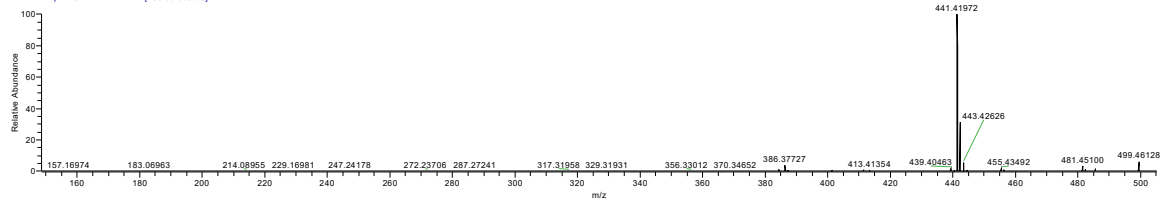

170213-07HRAPCI-Li-WeiWei-wx-688 #209-218 RT: 0.49-0.51 AV: 10 NL: 6.25E9  
 T: FTMS + p APCI corona Full ms [150.00-500.00]

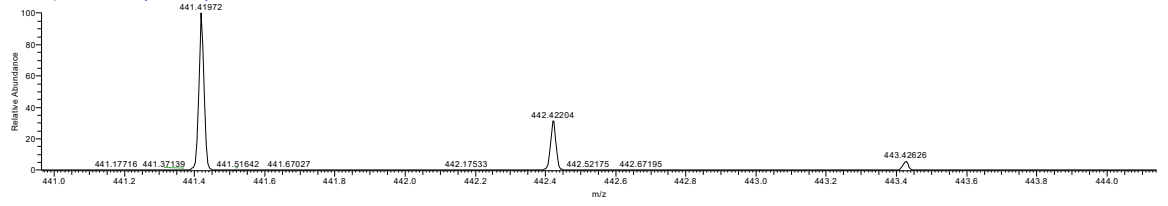

170213-07HRAPCI-Li-WeiWei-wx-688#209-218 RT: 0.49-0.51 AV: 10  
 T: FTMS + p APCI corona Full ms [150.00-500.00]

m/z = 441.39345-441.45088

| m/z       | Intensity    | Relative | Resolution | Charge | Theo. Mass | Delta (ppm) | RDB equiv. | Composition                                      |
|-----------|--------------|----------|------------|--------|------------|-------------|------------|--------------------------------------------------|
| 441.41972 | 6253150720.0 | 100.00   | 26389.25   | 1.00   | 441.42033  | -1.36       | 5.5        | C <sub>30</sub> H <sub>53</sub> N <sub>2</sub>   |
|           |              |          |            |        | 441.41765  | 4.71        | 1.0        | C <sub>27</sub> H <sub>55</sub> O <sub>3</sub> N |
